# Supplementary material for: Views on Using Social Robots in Professional Caregiving: Content Analysis of a Scenario Method Workshop
Source: PubMed Central journal article supplement (PMC8663608; doi:10.2196/20046), 2021-11-10

## Appendix 2

| Speaker           | Employer/Title                                                                                                                        | Translated Title (Original title)                                                                                                                              |
|-------------------|---------------------------------------------------------------------------------------------------------------------------------------|----------------------------------------------------------------------------------------------------------------------------------------------------------------|
| Janowksi, Kathrin | University Augsburg<br>Faculty of Applied Computer Science<br>Chair for Multimodal Human-Technology Interaction                       | What are social machines already doing today?<br>(Was machen soziale Maschinen heute schon?)                                                                   |
| Günther, Detlef   | ETH Zürich<br>Vice President for Research and Industrial Relations                                                                    | Are machines social?<br>(Sind soziale Maschinen sozial?)                                                                                                       |
| Vayena, Effy      | ETH Zürich<br>Health Ethics and Policy Lab<br>Bioethicist                                                                             | (Social Robots in Health Care – ethical challenges)                                                                                                            |
| Ehlers, Jan       | University Witten/Herdecke<br>Faculty of Health<br>Department of Medicine<br>Chair for Didactics & Educational Research in Healthcare | Care scenarios in a digital world. On the way to a utopia or dystopia?<br>(Pflugeszenarien in einer digitalen Welt. Auf dem Weg in eine Utopie oder Dystopie?) |
| Korn, Marc Oliver | University Offenburg<br>Affective Cognitive Institute<br>Chair for Human Computer Interaction                                         | Emotions and AI – how machines learn to interpret human emotions.<br>(Emotionen und AI – wie Maschinen lernen, menschliche Emotionen zu deuten)                |
| Bendel, Oliver    | University Nordwestschweiz<br>University for Business Informatics                                                                     | What makes robots social?<br>(Was macht Roboter sozial?)                                                                                                       |
| De Witte, Bart    | Founder of the HIPPO AI Foundation & Digital Health Academy in Berlin                                                                 | Synthetic empathy: The robot's new clothes<br>(Synthetische Empathie: Des Robots neue Kleider)                                                                 |

The order of the table is based on the order of the presentations at the workshop. The slides of the talks (except the slides of Bart de Witte) can be seen below. Bart de Wittes talk is available as a webtalk: [https://www.youtube.com/watch?v=jYpfUjMUD\\_Y](https://www.youtube.com/watch?v=jYpfUjMUD_Y)

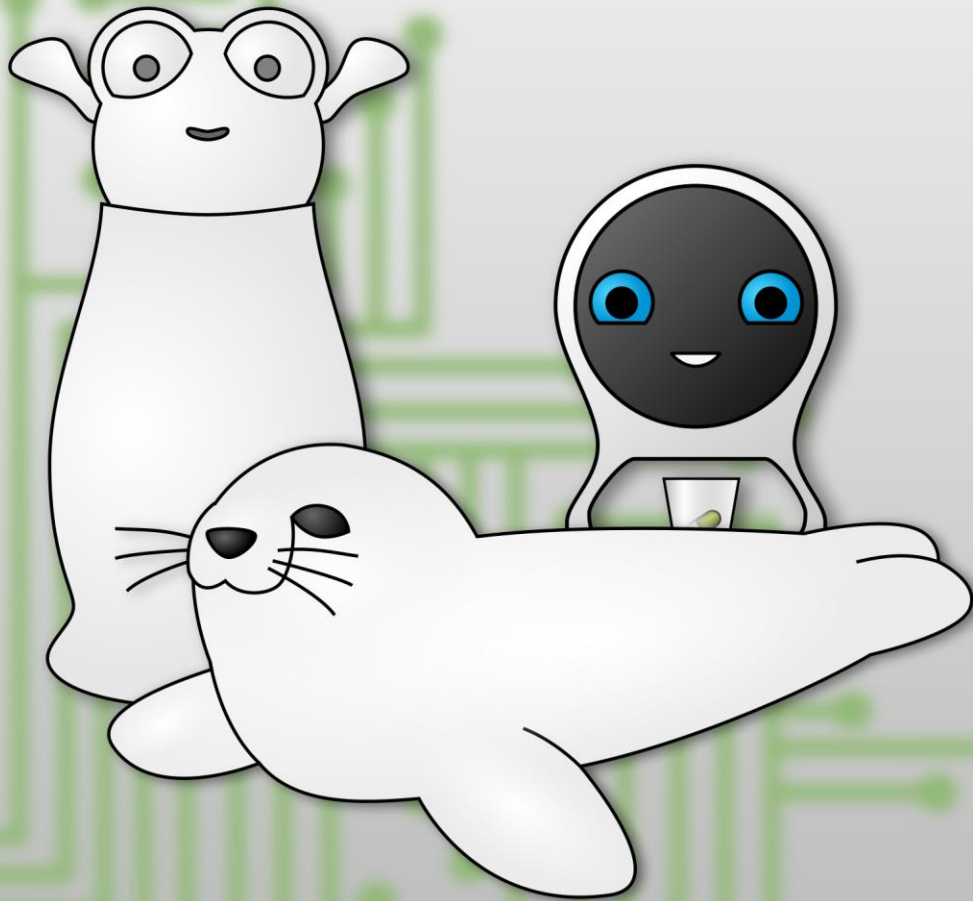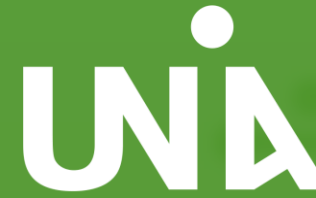

Universität Augsburg  
Fakultät für Angewandte  
Informatik

## Was machen soziale Maschinen heute schon?

Kathrin Janowski, M.Sc.

Lehrstuhl für Multimodale Mensch-Technik Interaktion

13. Februar, Careum Dialog 2020, Zürich

viva

 ForGenderCare  
ANWANDTUNGSGEBIETE FÜR GENDERRECHTE

  
Emma  
emotional mobile assistant

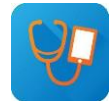

# Überblick

---

**1** Die Maschine als **Verwalter**

**2** Die Maschine als **Vermittler**

**3** Die Maschine als **Vertrauter**

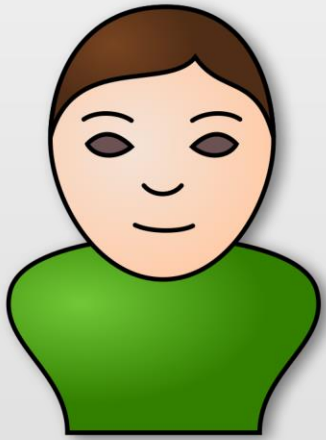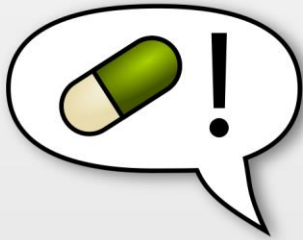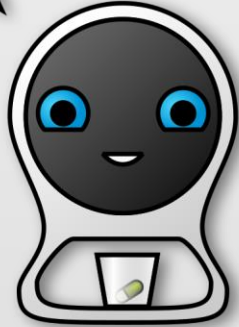

01

DIE MASCHINE  
ALS  
VERWALTER

# Verwalter

- Erinnerung
- Empfehlung
- Erklärung

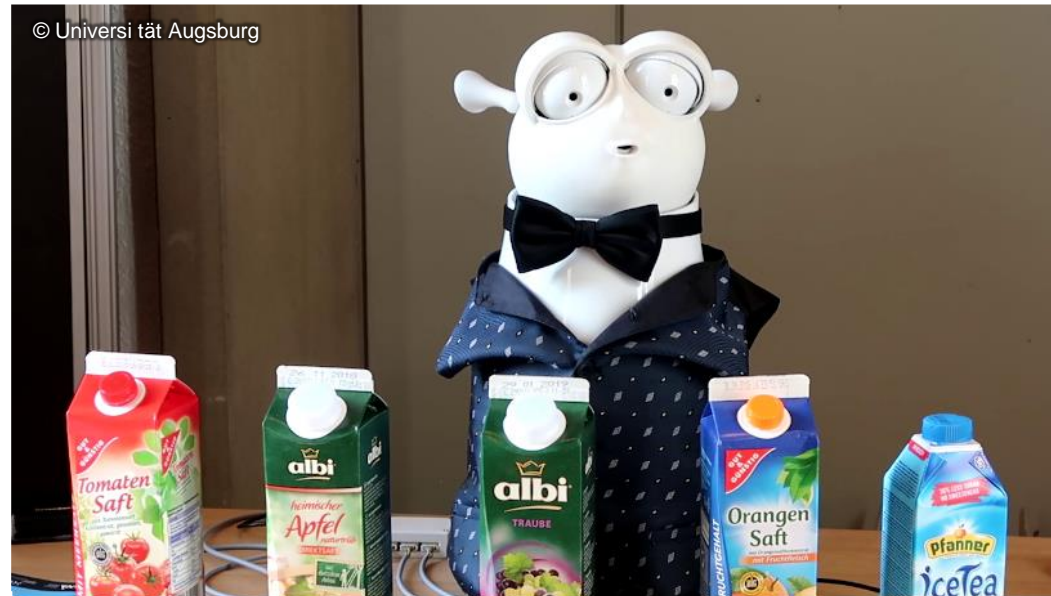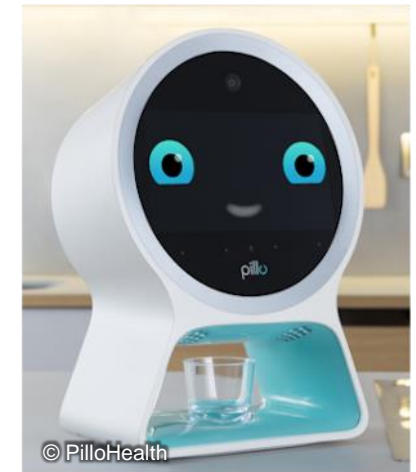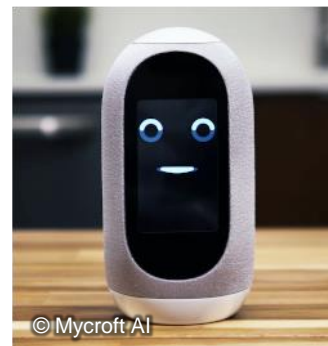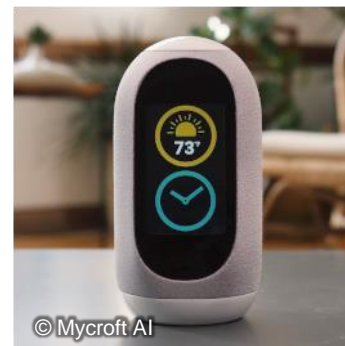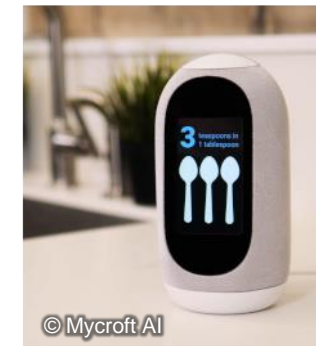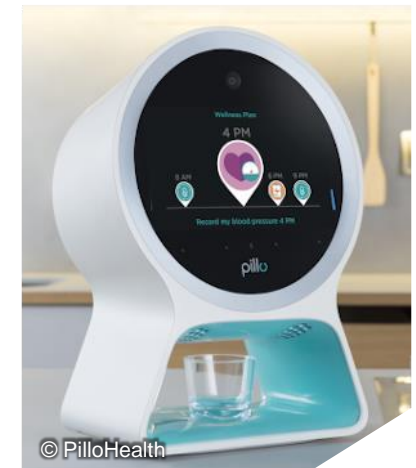

# Kernkompetenz: Anpassung

- Argumentation

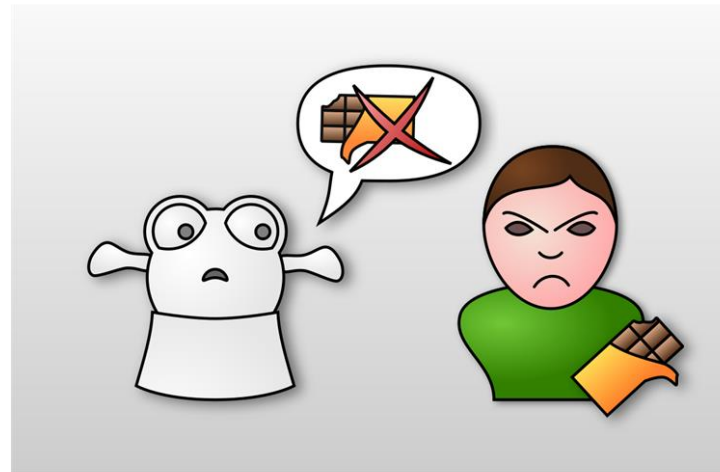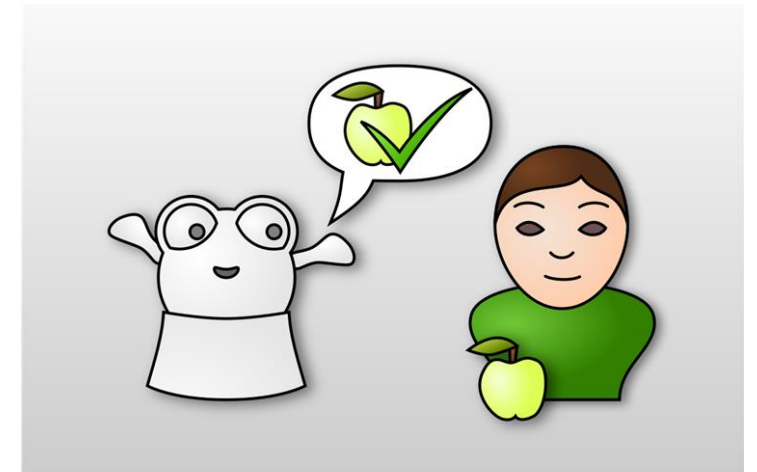

- Auftreten

- Angewohnheiten

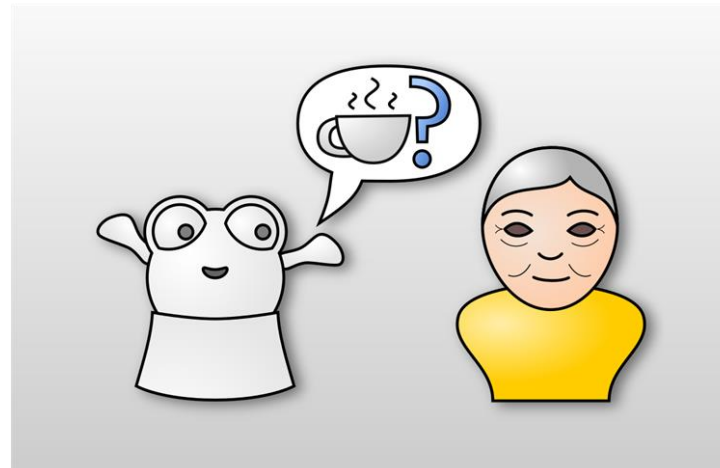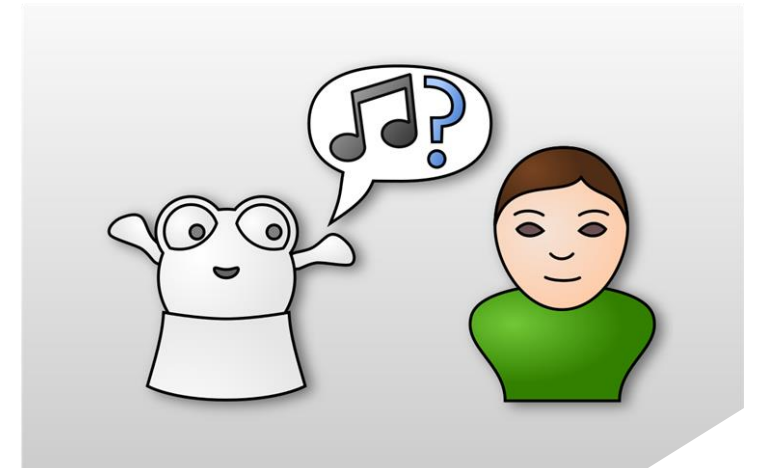

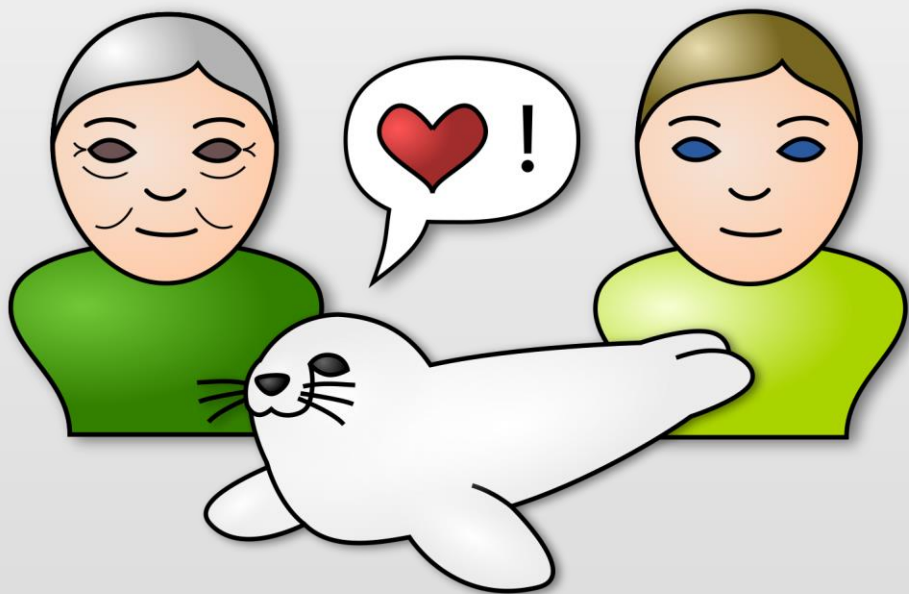

02

DIE MASCHINE  
ALS  
VERMITTLER

# Vermittler

- Stimulation

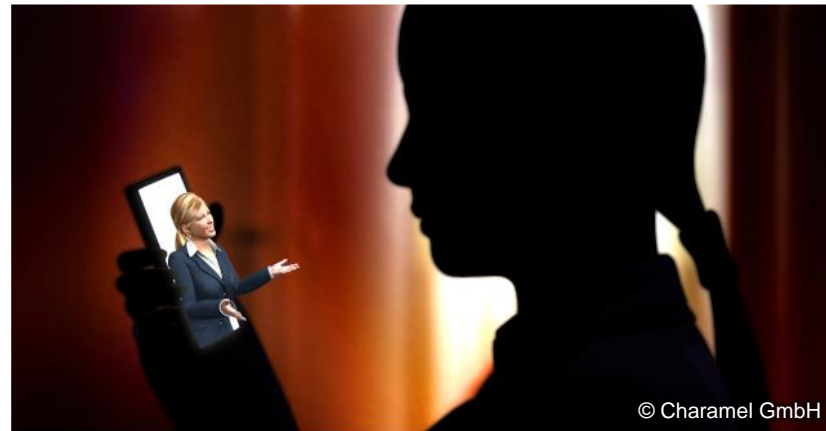

- Schulung

```
Welcome to
EEEEEE LL      IIII ZZZZZZ  AAAA
EE      LL      II       ZZ  AA  AA
EEEEEE LL      II       ZZZ  AAAAAA
EE      LL      II       ZZ  AA  AA
EEEEEE LLLLLL  IIII  ZZZZZZ  AA  AA

Eliza is a mock Rogerian psychotherapist.
The original program was described by Joseph Weizenbaum in 1966.
This implementation by Norbert Landsteiner 2005.

ELIZA: Is something troubling you ?
YOU:  Men are all alike.
ELIZA: What is the connection, do you suppose ?
YOU:  They're always bugging us about something or other.
ELIZA: Can you think of a specific example ?
YOU:  Well, my boyfriend made me come here.
ELIZA: Is it important to you that your boyfriend made you come here ?
YOU:  He says I'm depressed much of the time.
ELIZA: I am sorry to hear that you are depressed.
YOU:  It's true. I am unhappy.
ELIZA: Can you explain what made you unhappy ?
YOU:  █
```

- Stellvertreter

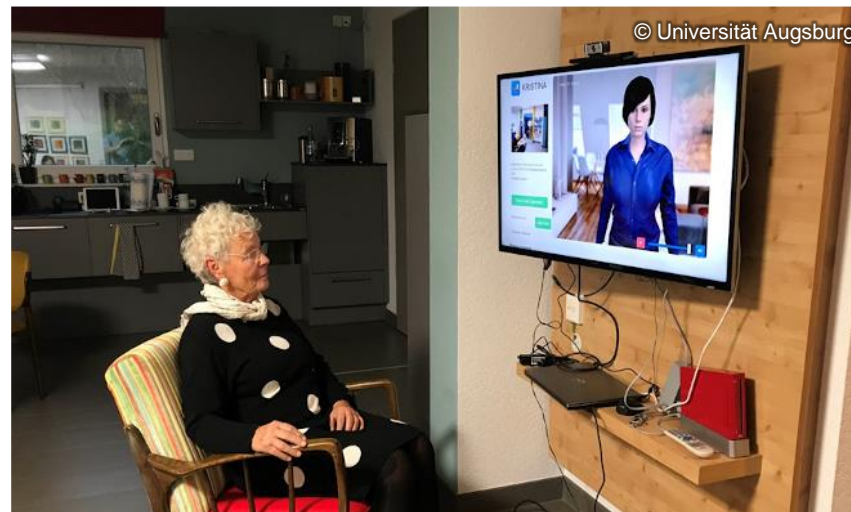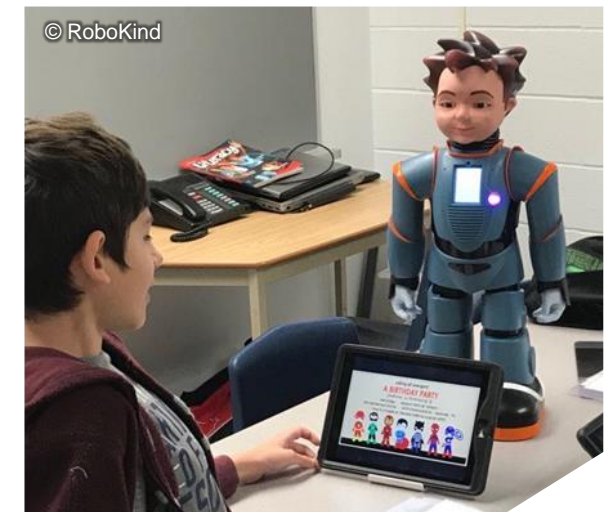



# Kernkompetenz: Emotionen

- Expressivität

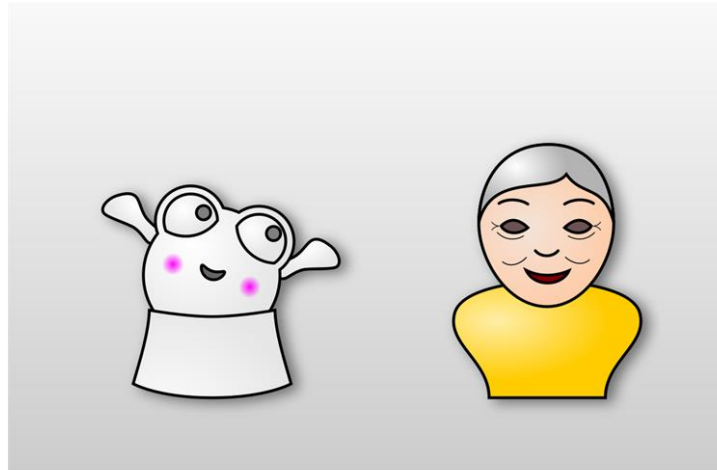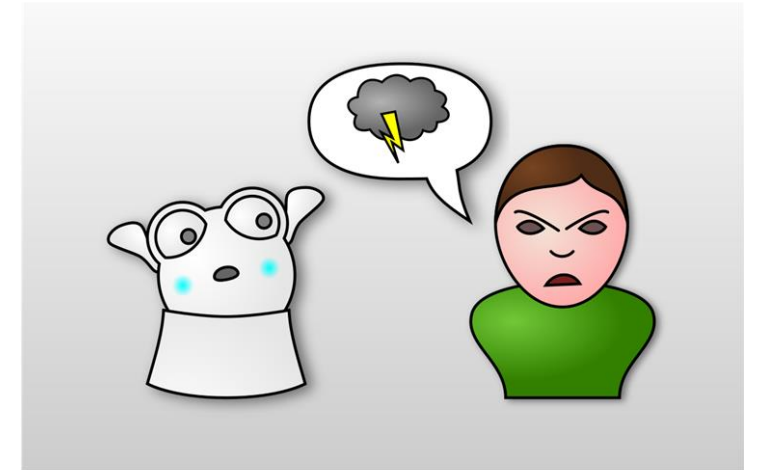

- Erkennung

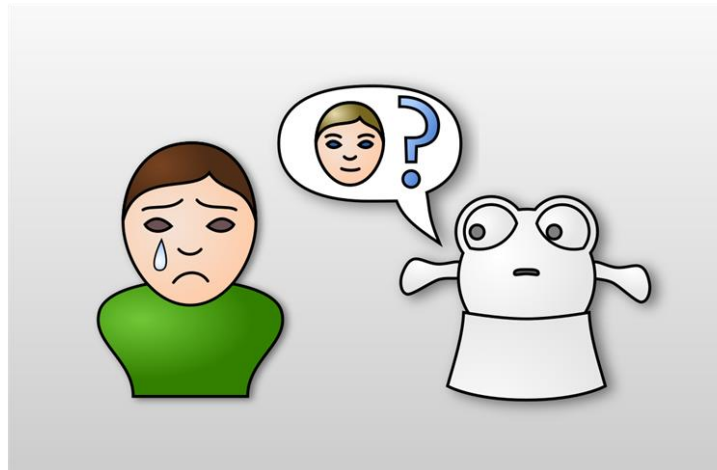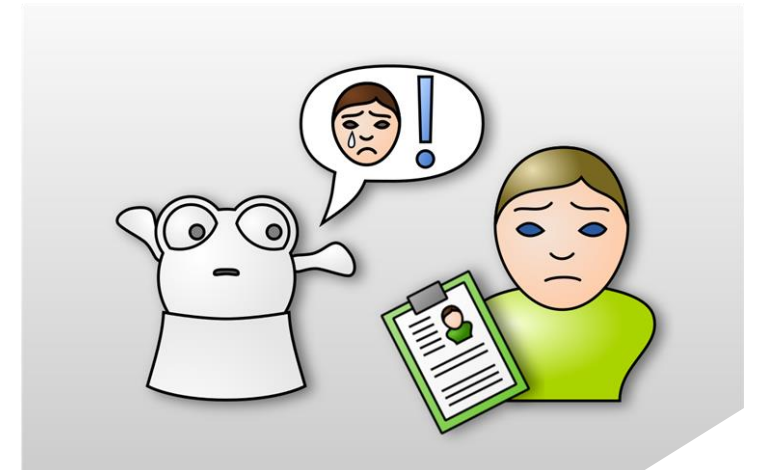

- Empathie

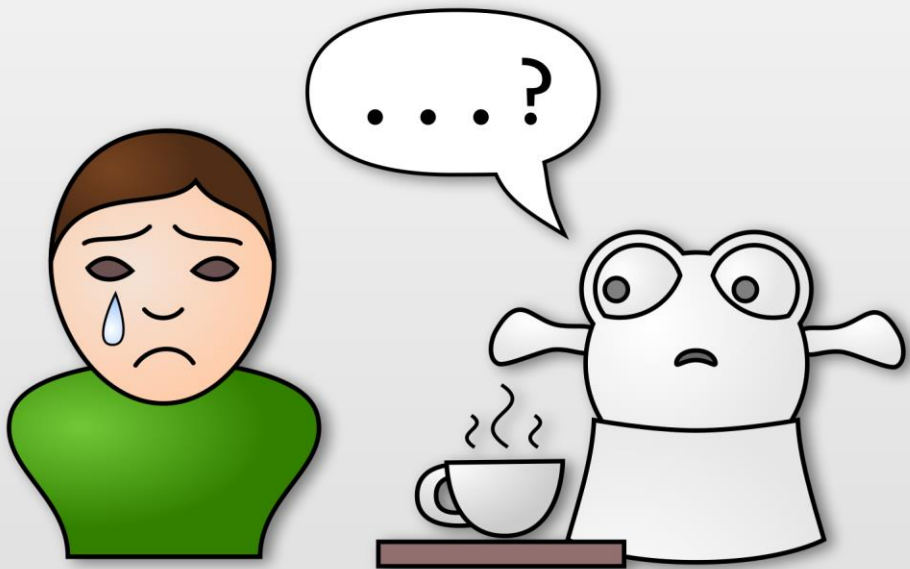

# 03

DIE MASCHINE  
ALS  
VERTRAUTER

# Vertrauter

- Beschäftigung
- Begleitung
- Bindung

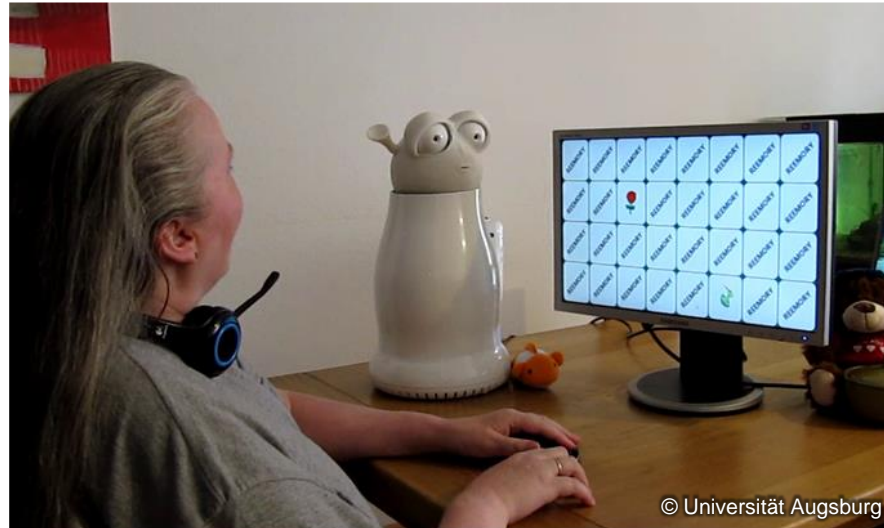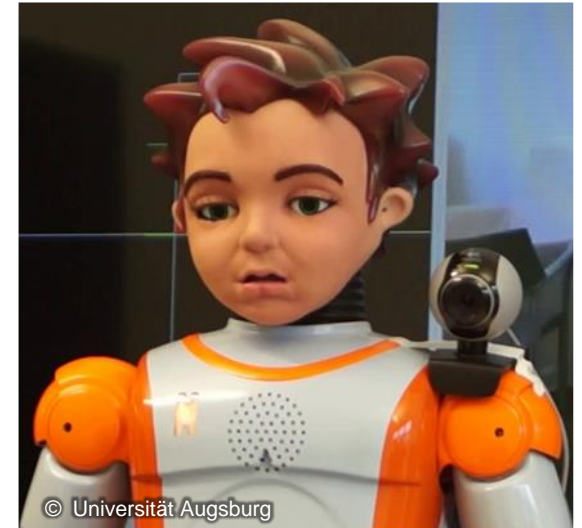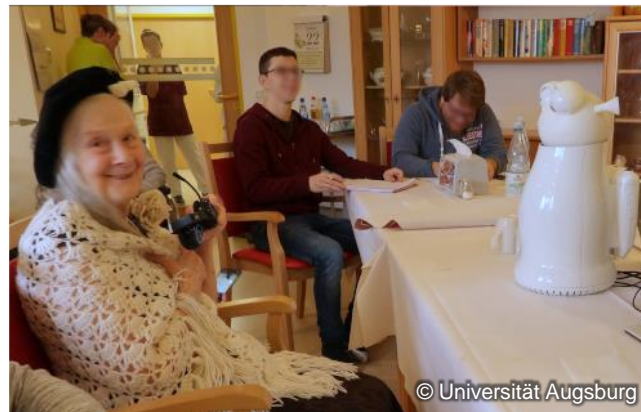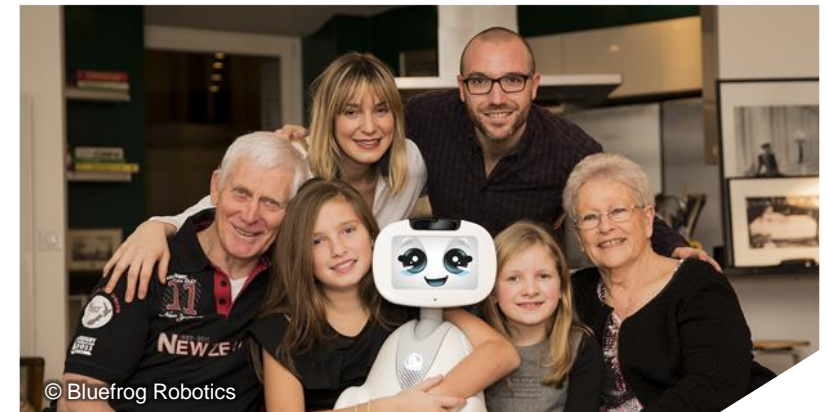

# Kernkompetenz: Gemeinsamkeiten

- Geschichte

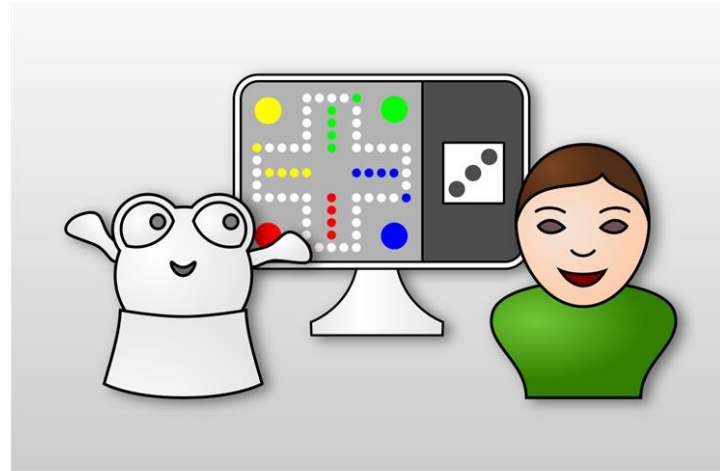

- Gespräche

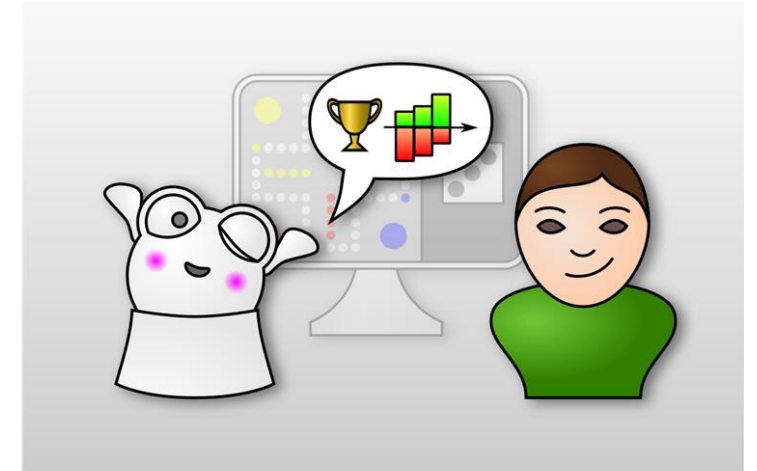

- Gefühle

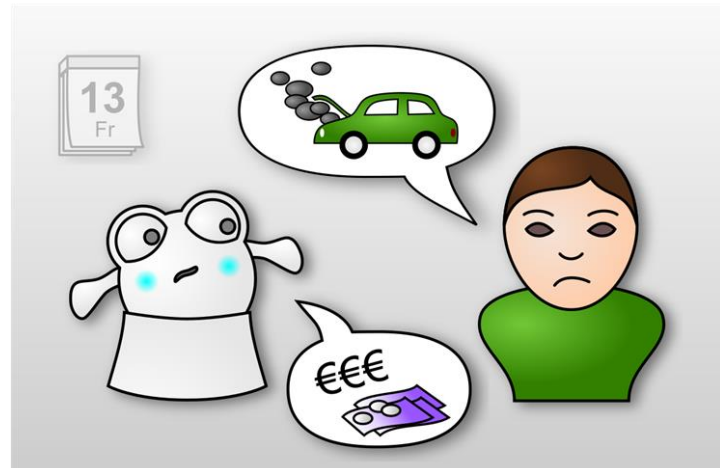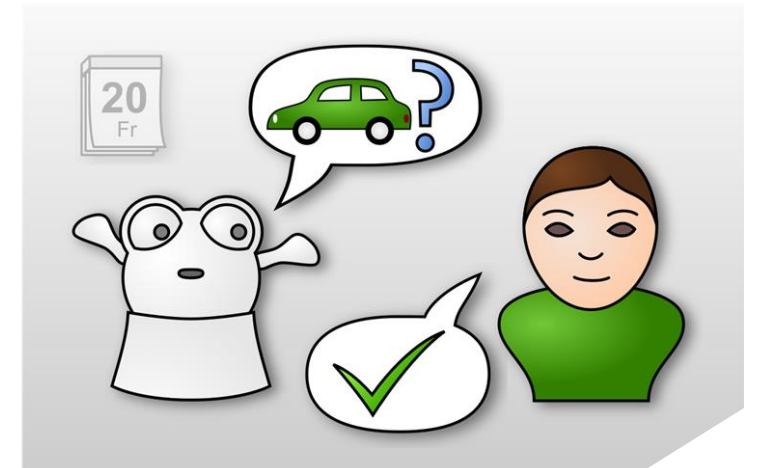

# Fazit

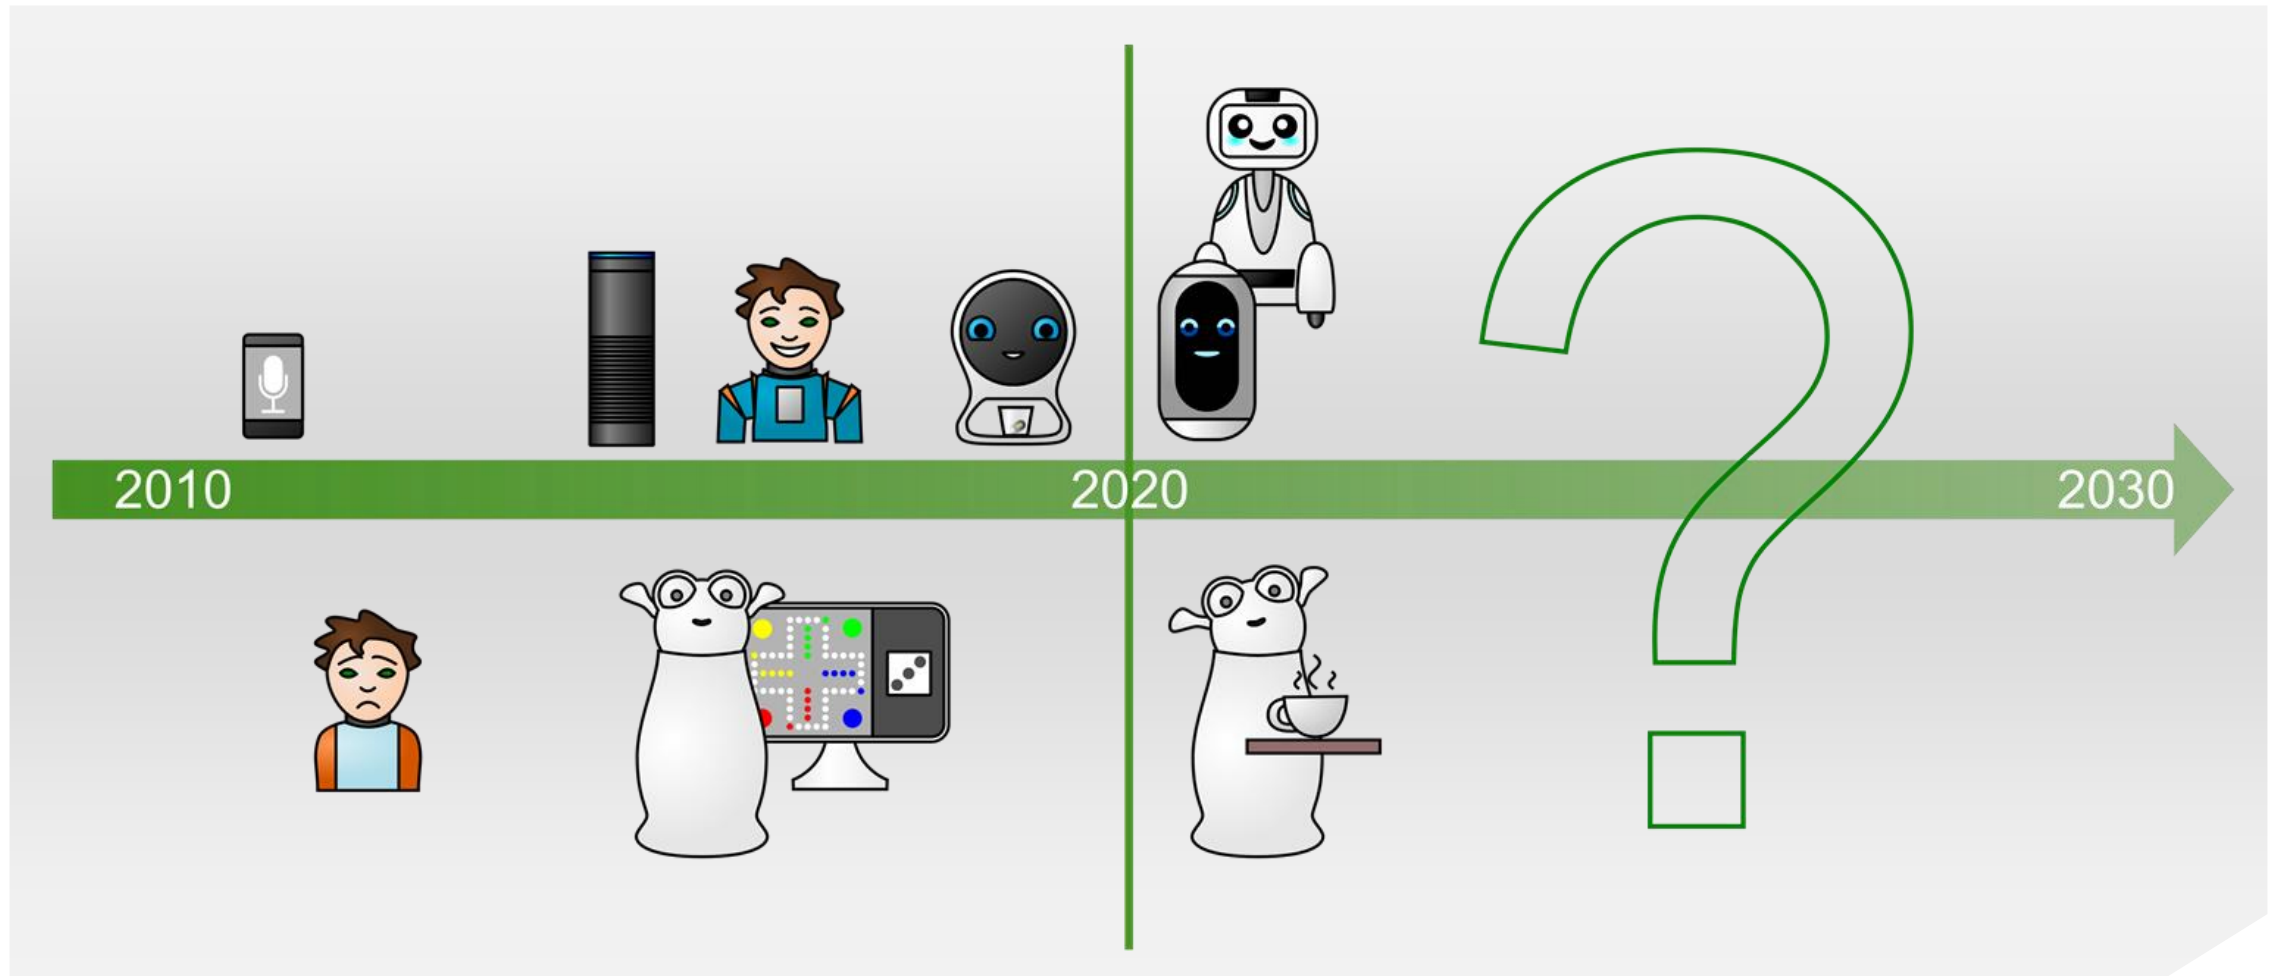

Bayerisches Staatsministerium für  
Bildung und Kultus, Wissenschaft und Kunst

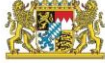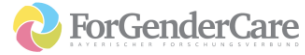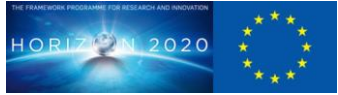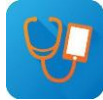

GEFÖRDERT VOM

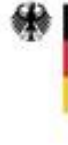

Bundesministerium  
für Bildung  
und Forschung

viva

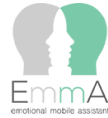

Vielen Dank für Ihre Aufmerksamkeit!

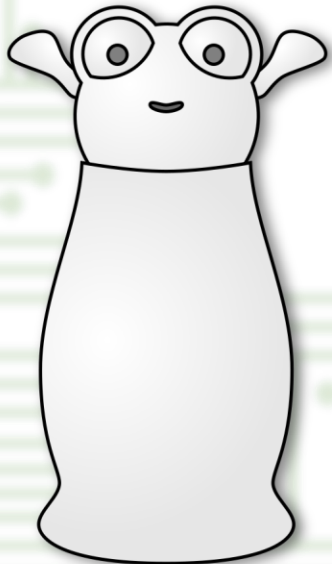

**UNI** Universität Augsburg  
Fakultät für Angewandte  
Informatik

Kathrin Janowski, M.Sc.

Multimodale Mensch-Technik-Interaktion

Universität Augsburg

[kathrin.janowski@informatik.uni-augsburg.de](mailto:kathrin.janowski@informatik.uni-augsburg.de)

[www.uni-augsburg.de](http://www.uni-augsburg.de)

Detlef Günther, Careum Dialog 2020

# Sind soziale Maschinen sozial?

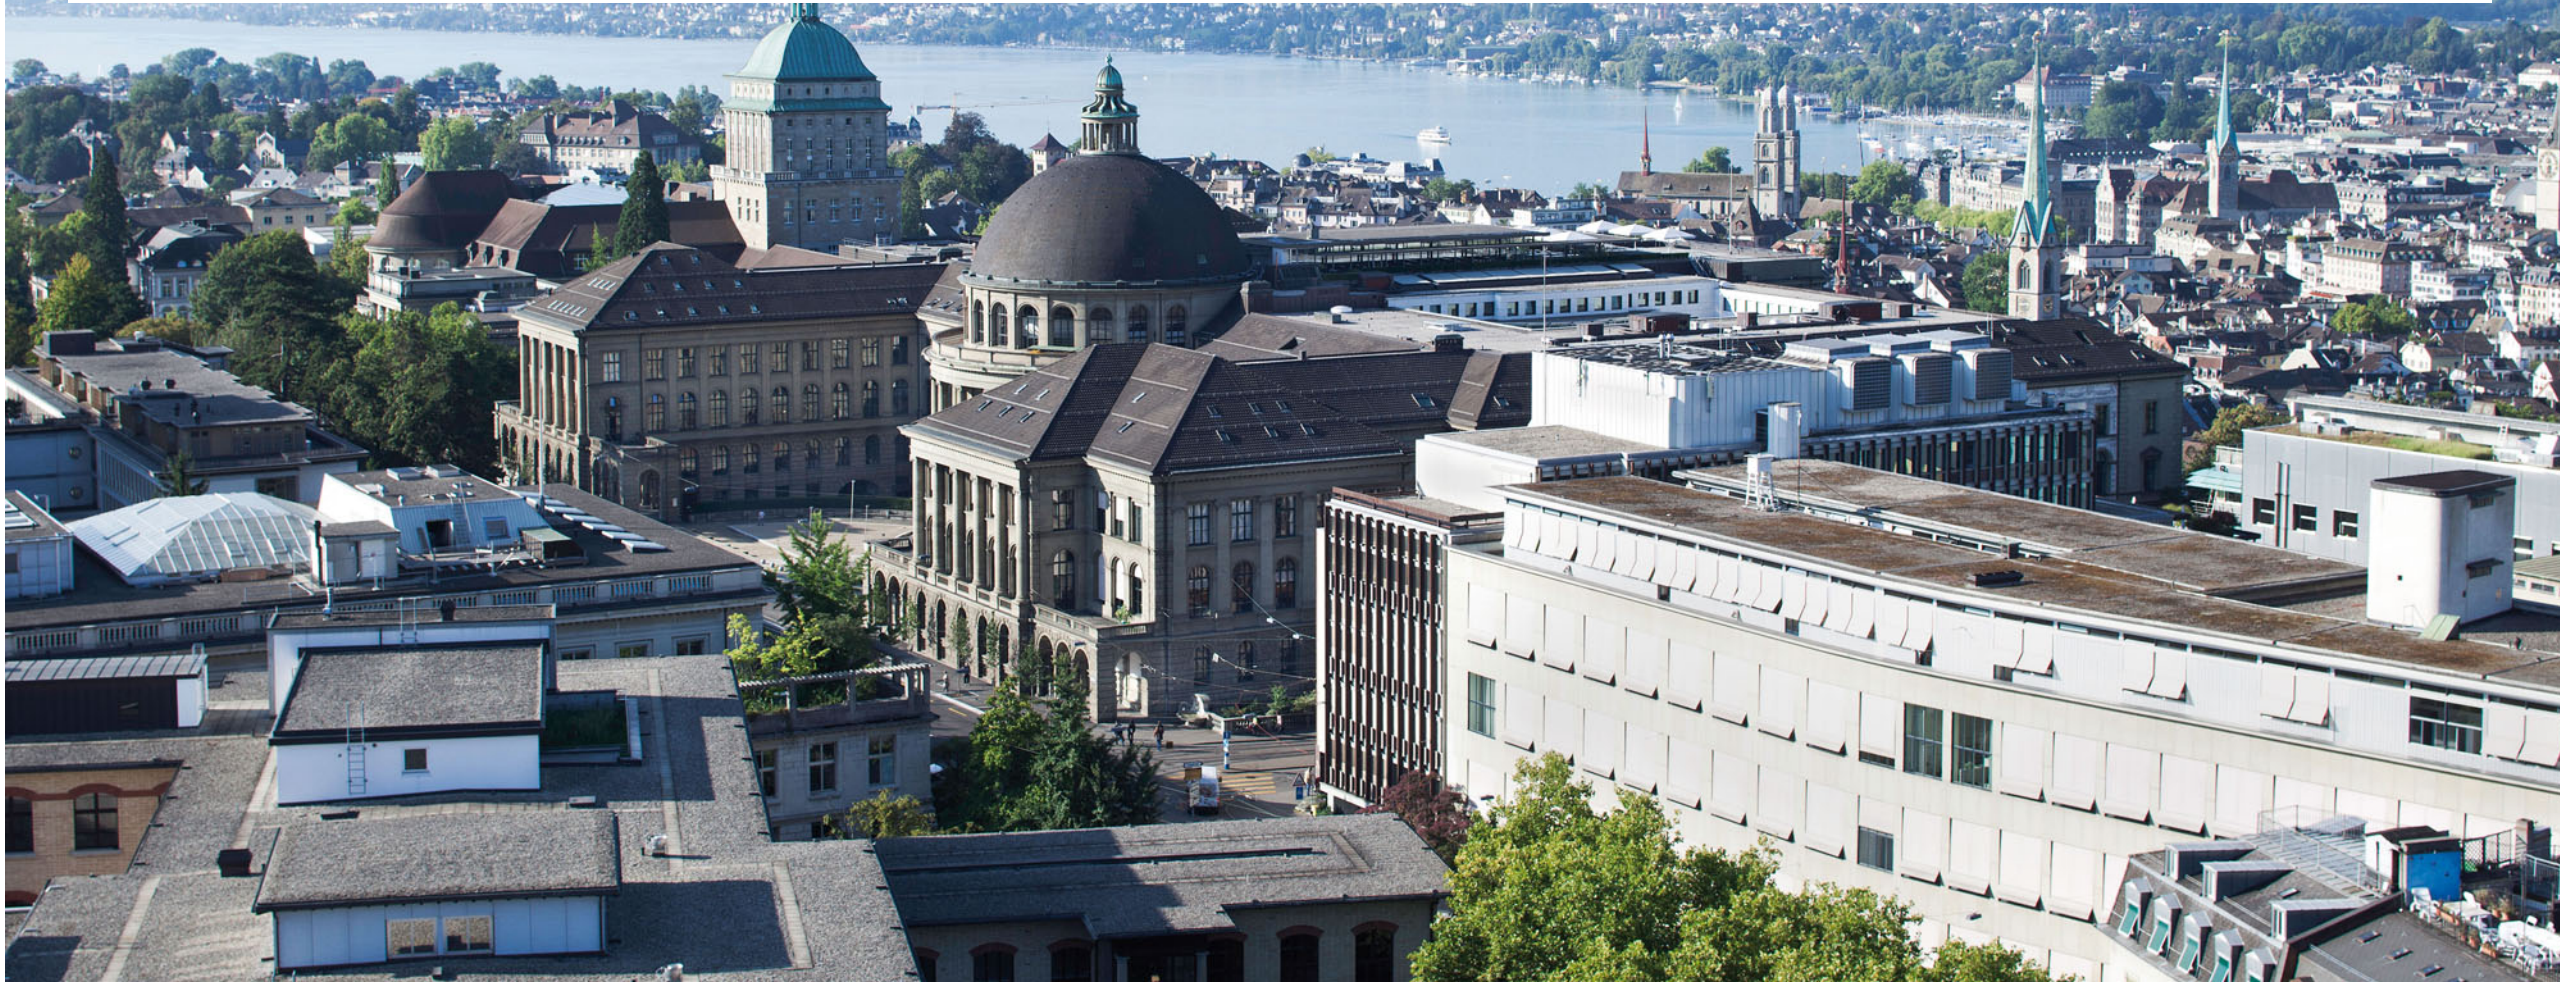

# Sind soziale Maschinen sozial?

- Schwindet die Differenz Mensch-Maschine?
- Können Maschinen Partner werden?
- Gefühle erlernen?
- Eine Persönlichkeit entwickeln?
- Kann man ihnen vertrauen?

**Was sind soziale Maschinen?**



# Was sind soziale Maschinen?

**Soziale Roboter!**

**Pflege- oder  
Service-Roboter!**

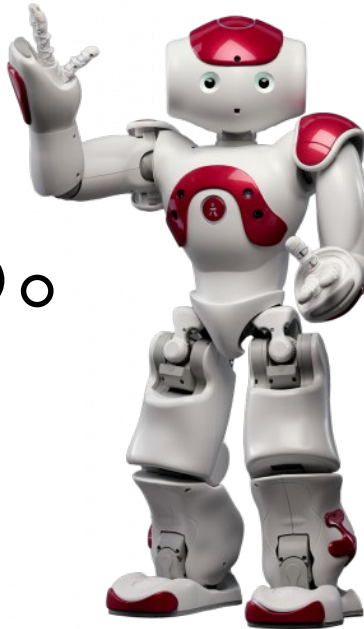

Co-creation!  
Gemeinsam sind  
wir klüger

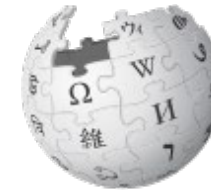

Citizen Science!

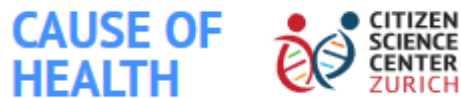

Social Networking!

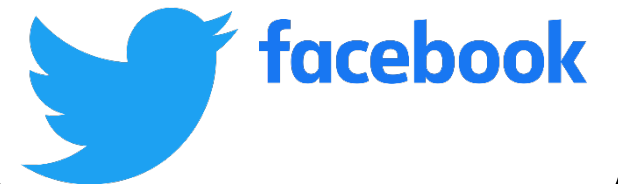

# Die Herausforderungen

Unsere “reale” Welt ist **variantenreich** und sehr **komplex**

- Roboter müssen mit **unsicherer** und nur **teilweise verfügbarer Information** umgehen können.
- Roboter müssen **sehen, spüren** und **verstehen** können.
- Roboter müssen **taktil** mit der Umgebung interagieren können → («soft robots» mit Kraftreglung)
- Roboter müssen **intuitiv programmierbar** sein
- Roboter müssen **lern-** und **anpassungsfähig** sein

→ **Künstliche Intelligenz, Sensoren, Aktoren und Roboterkonzepte**

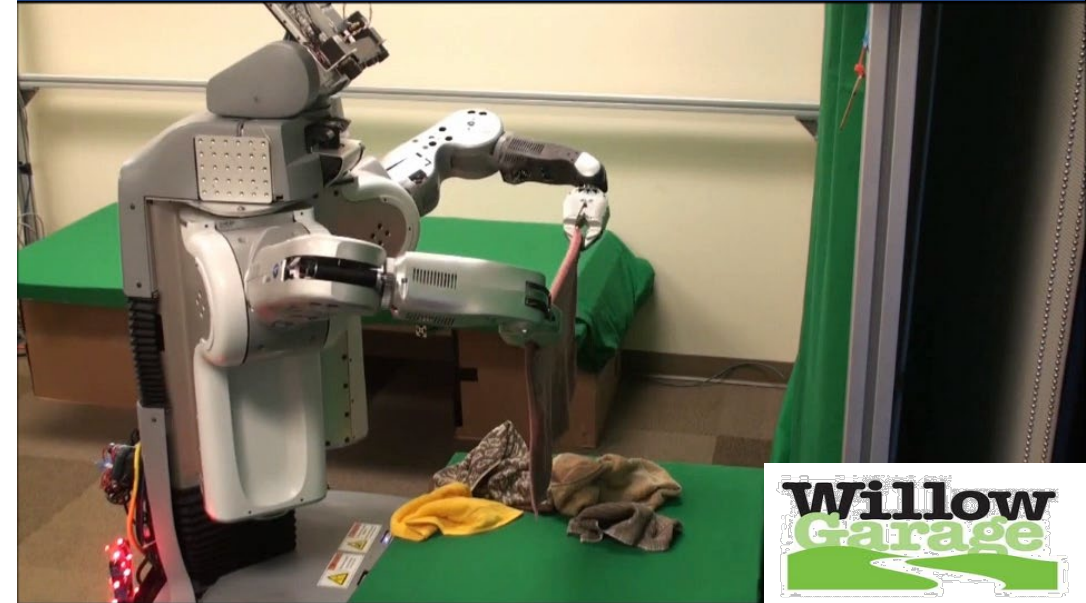

50x speed

<https://www.youtube.com/watch?v=gy5g33S0Gzo>

# Schwindet die Differenz Mensch-Maschine?

- **Vorstellungsvermögen heute**
  - Anders als in 2 Jahren!
- **scewo** – developed by students
- The stair-climbing wheelchair

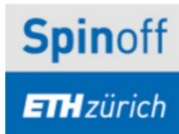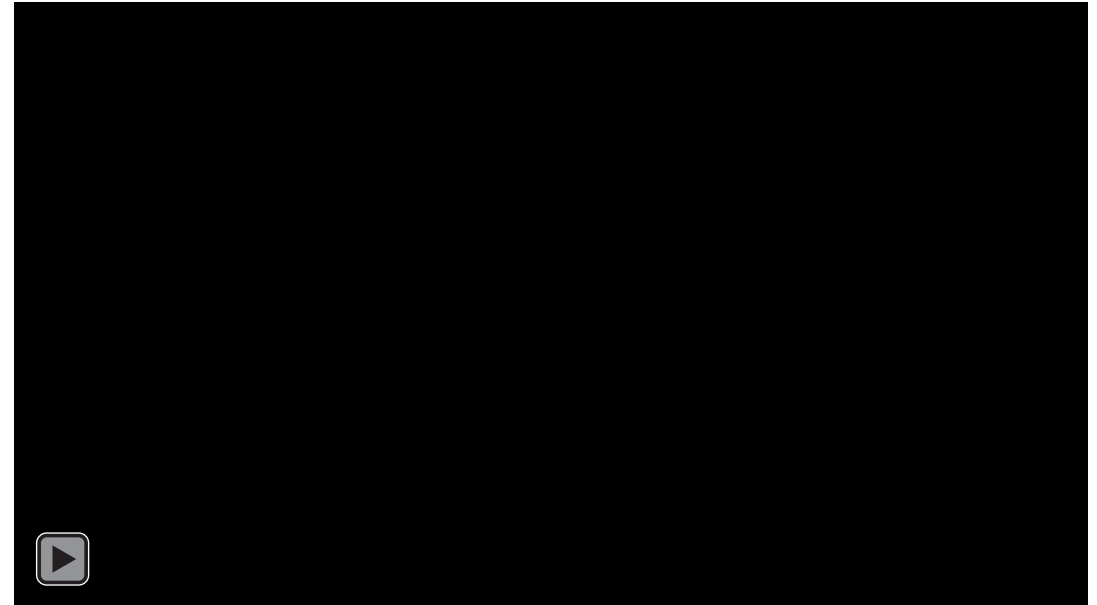

# Schwindet die Differenz Mensch-Maschine?

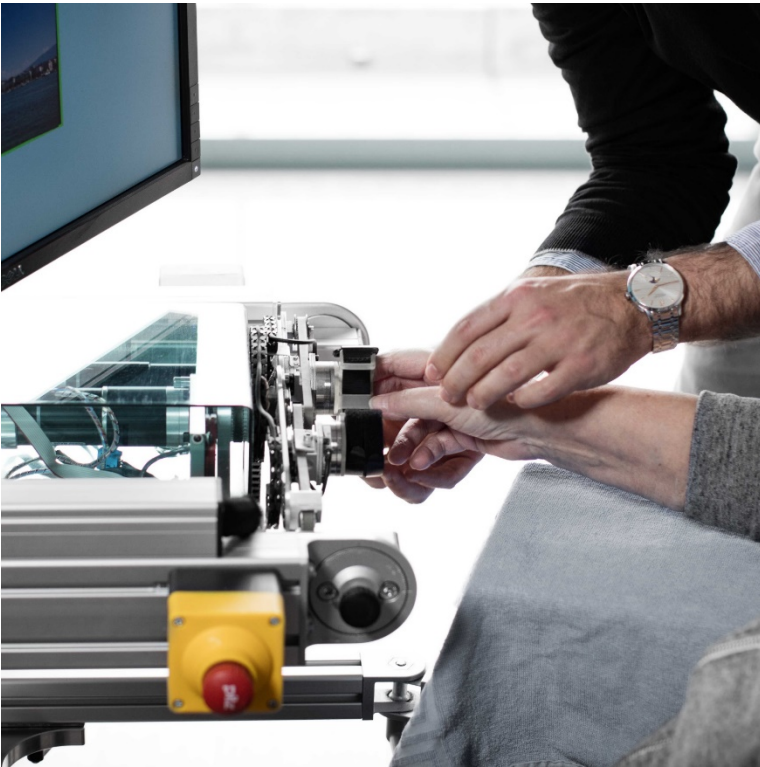

Roboter-unterstützte Rehabilitation der Handfunktion

Projekte Prof. Robert Gassert, ETH Zürich

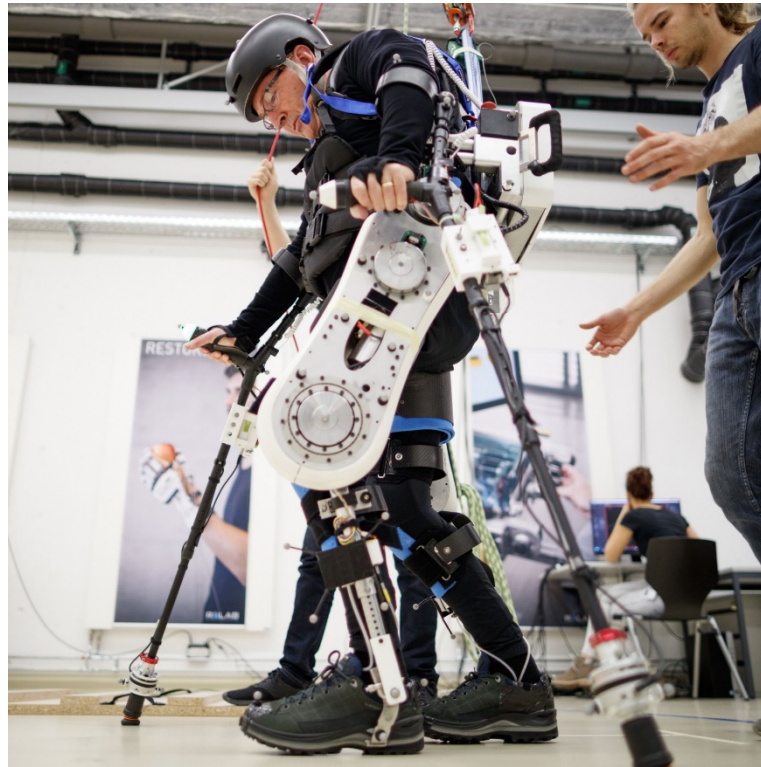

Ein Exoskelett für Querschnittsgelähmte

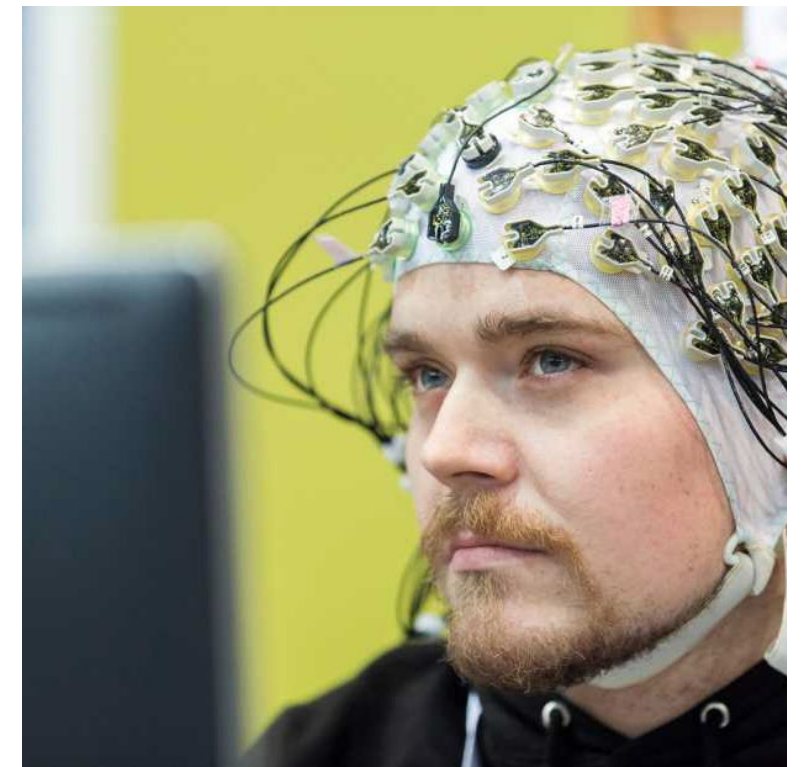

Gehirn-Computer-Schnittstelle  
➤ Mit Kraft der Gedanken

# Künstliche Intelligenz und Maschinelles Lernen – **Ja aber**

- Grosse Datenmengen für das Lernen
- Grosse Rechenleistung

## Generalisierung?

- Lernen über Interaktion mit der Welt?
- Multimodales Lernen?
- Lernen von semantischer Information
- Verstehen

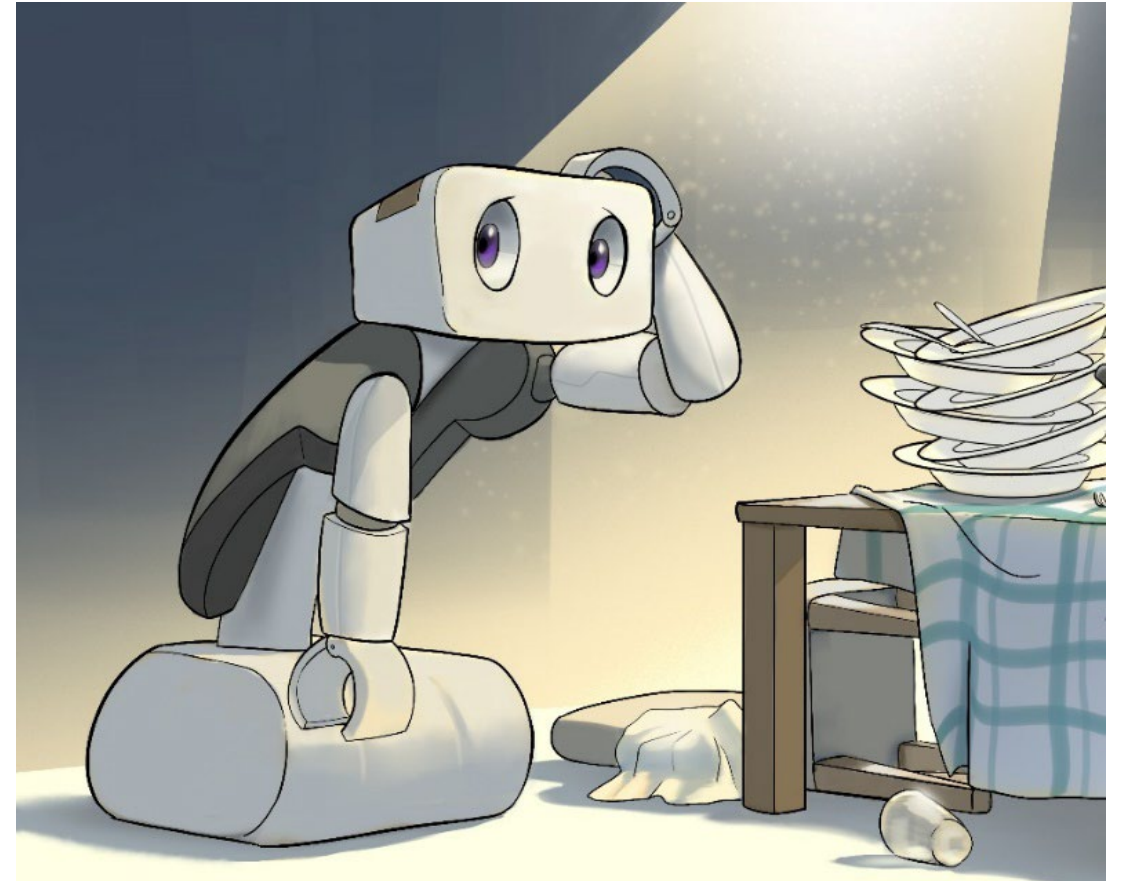

# Künstliche Intelligenz und Maschinelles Lernen

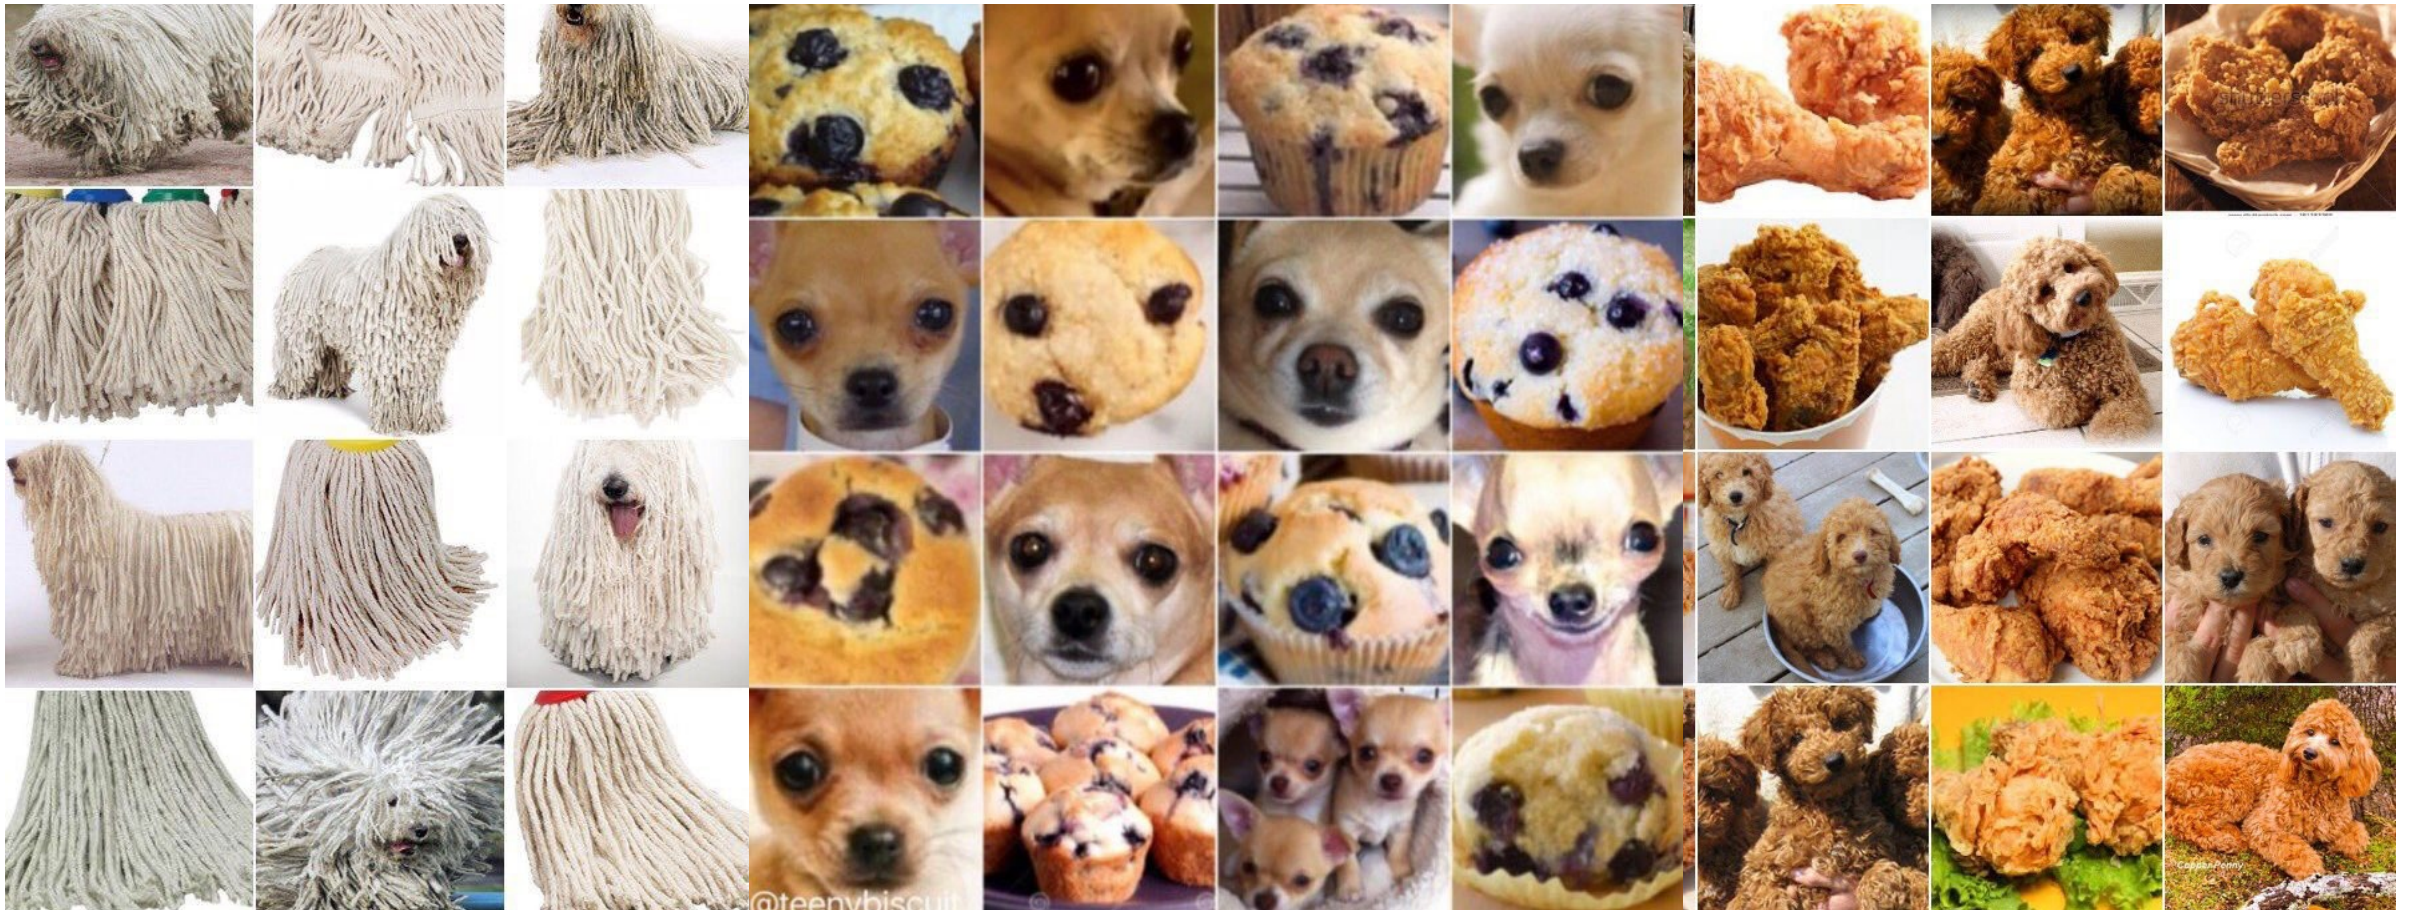

# Herausforderung

- Menschen sind nicht zu schlagen wenn es darum geht **komplexe Entscheidungen zu treffen und mit anderen zu interagieren.**
- Computer sind viel besser um **einfache aber schnelle Entscheidungen zu treffen.**

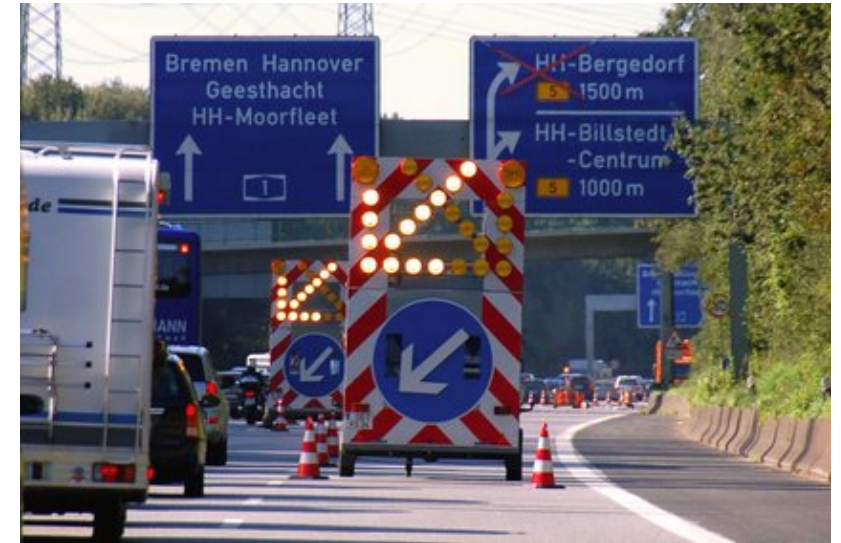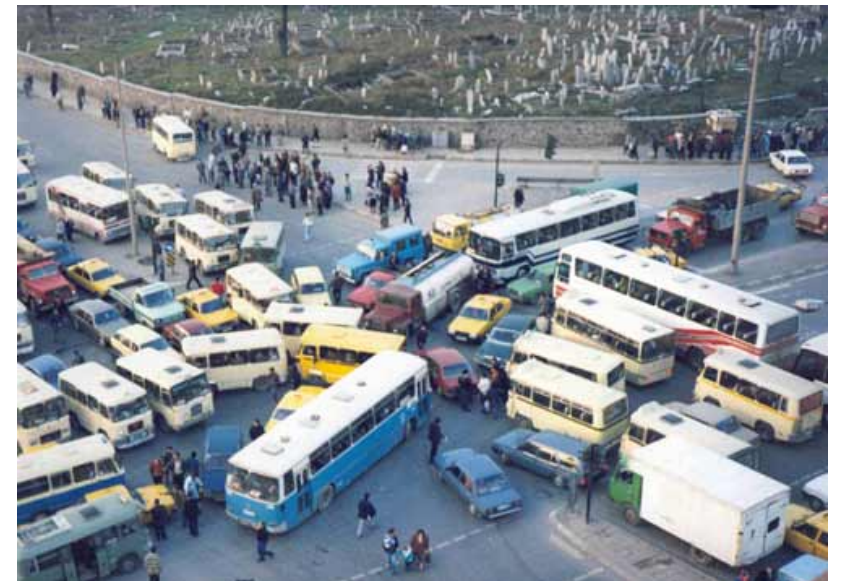

# Können Maschinen Partner werden?

➤ Virtuelle und reale Welt vereinen

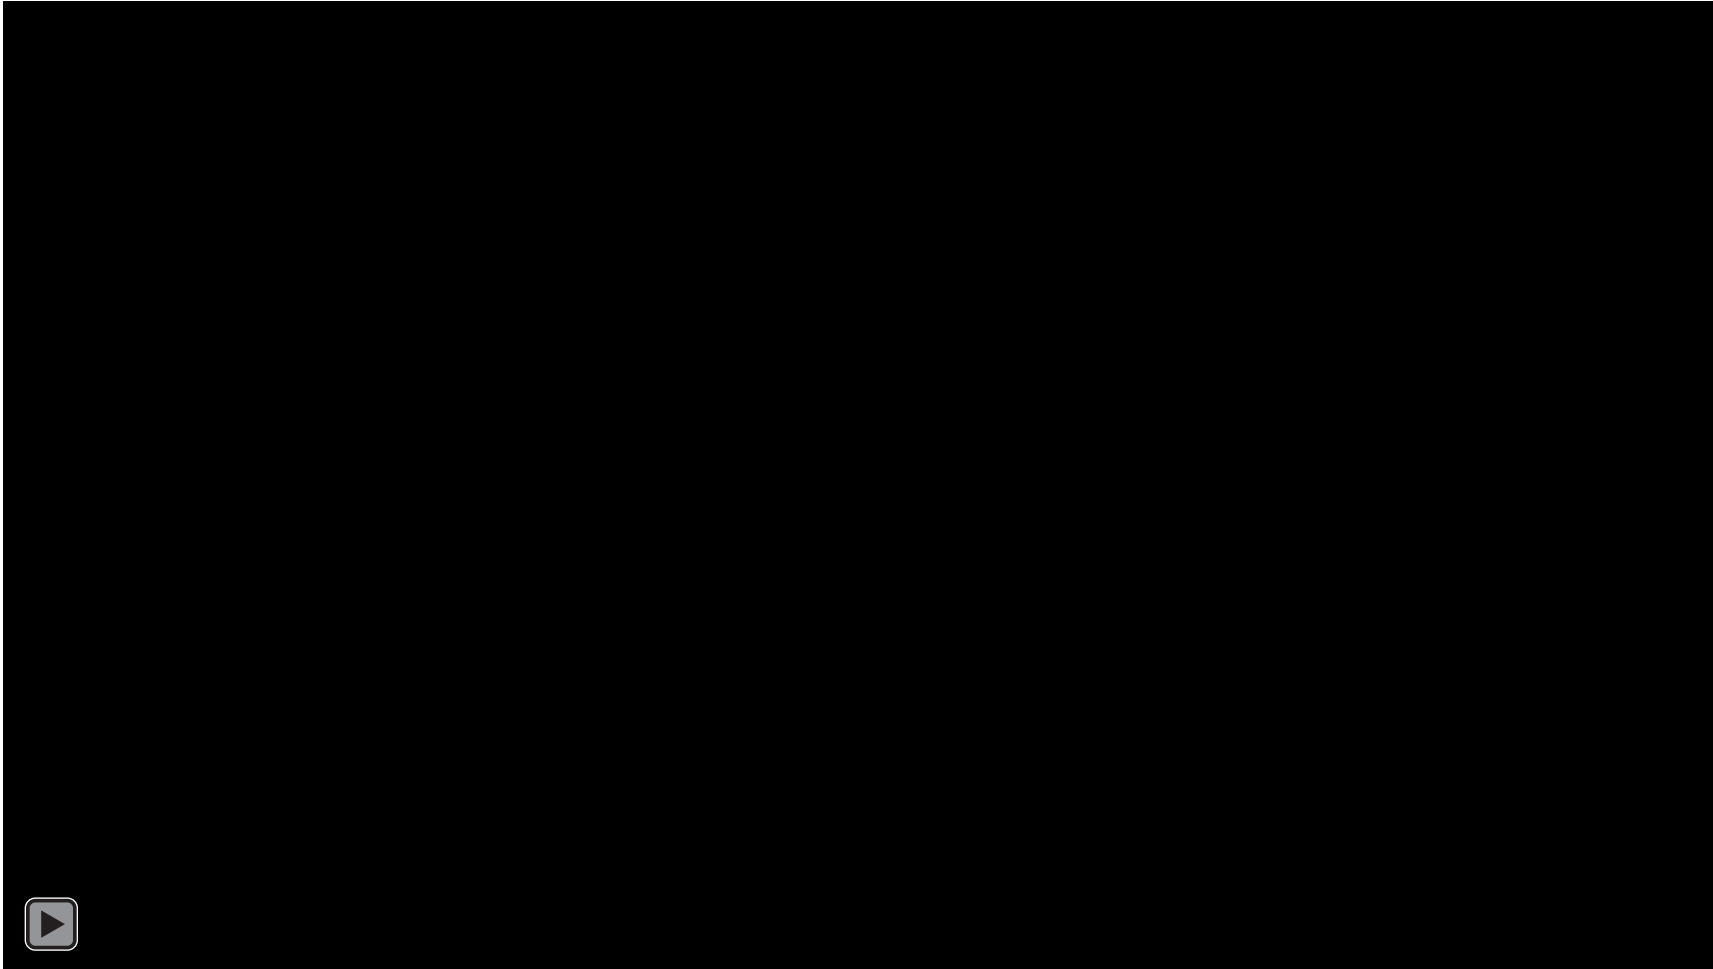

Projekt Prof. Roland Siegwart

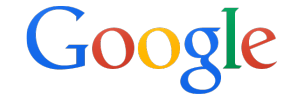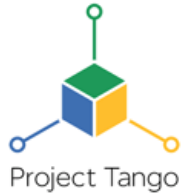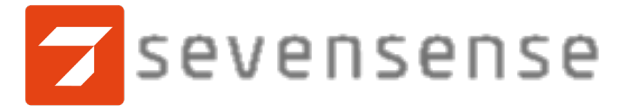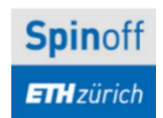



# Können Maschinen Partner werden?

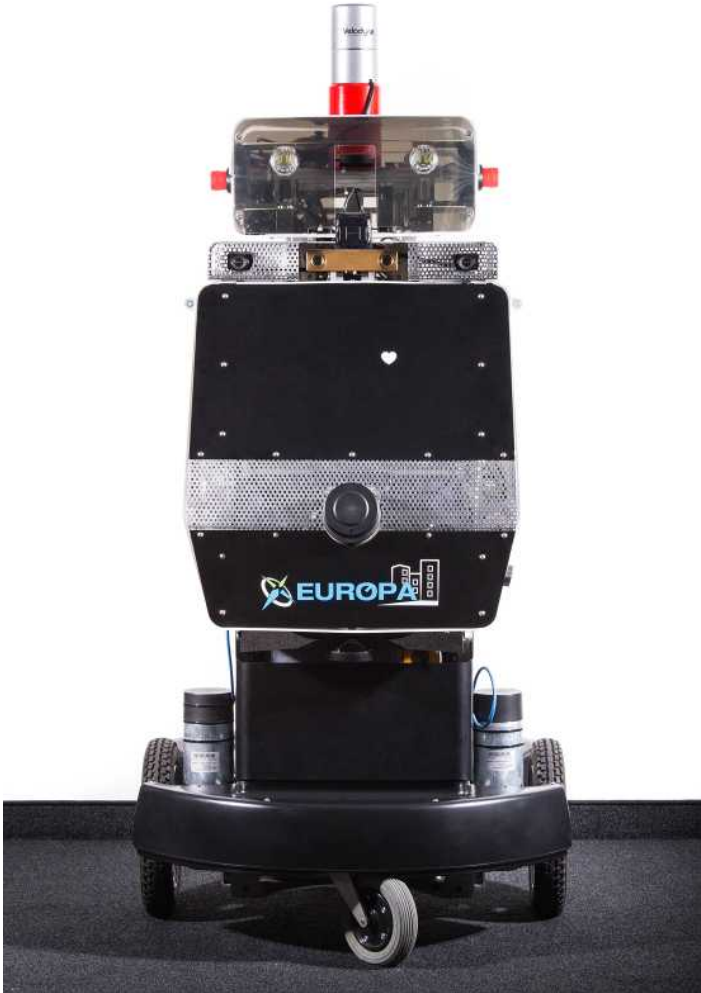

EUROPA | *European Robotic Pedestrian Assistant*

Serviceroboter, bewegt sich autonom in städtischen Umgebungen

ETH Zürich in Zusammenarbeit mit:

- University of Freiburg,
- Univ. of Oxford
- KU Leuven
- RWTH Aachen
- BlueBotics

# Können Maschinen Gefühle erlernen?

Beinprothese mit Berührungs-Empfinden erleichtert das Gehen.

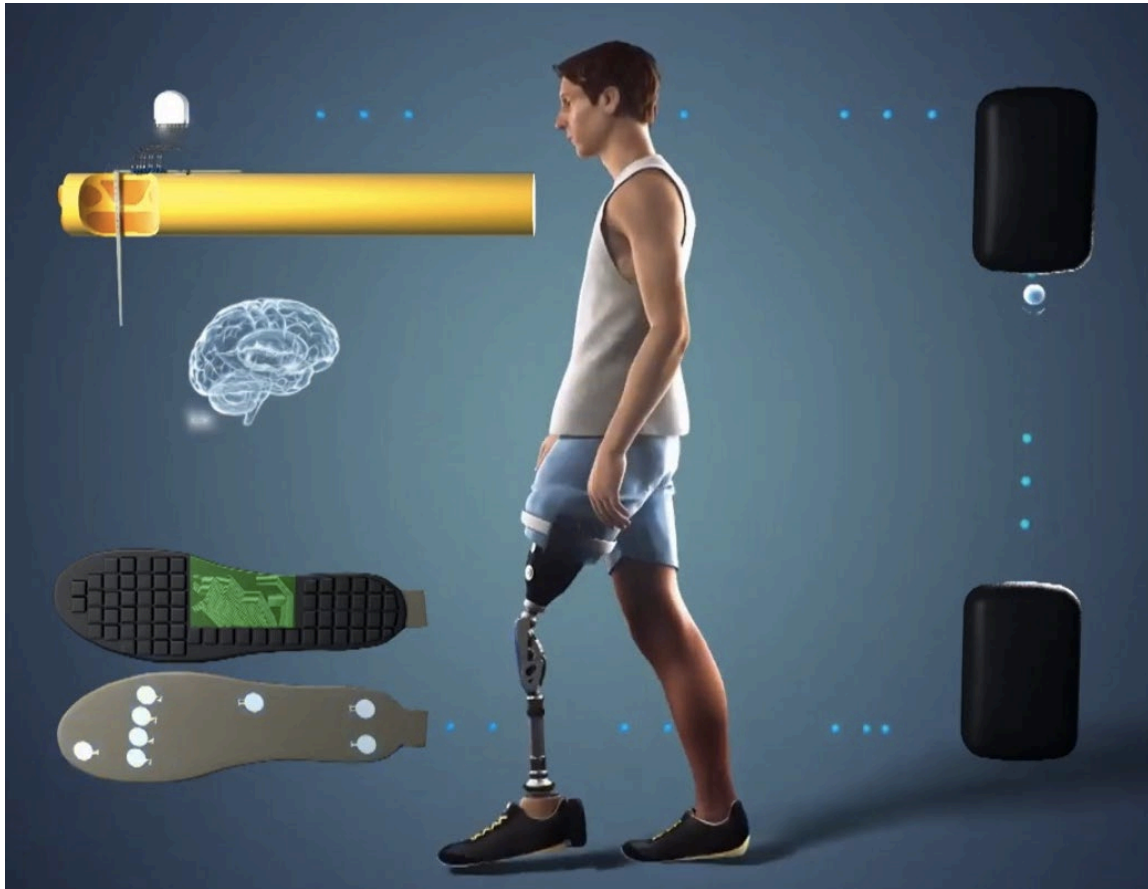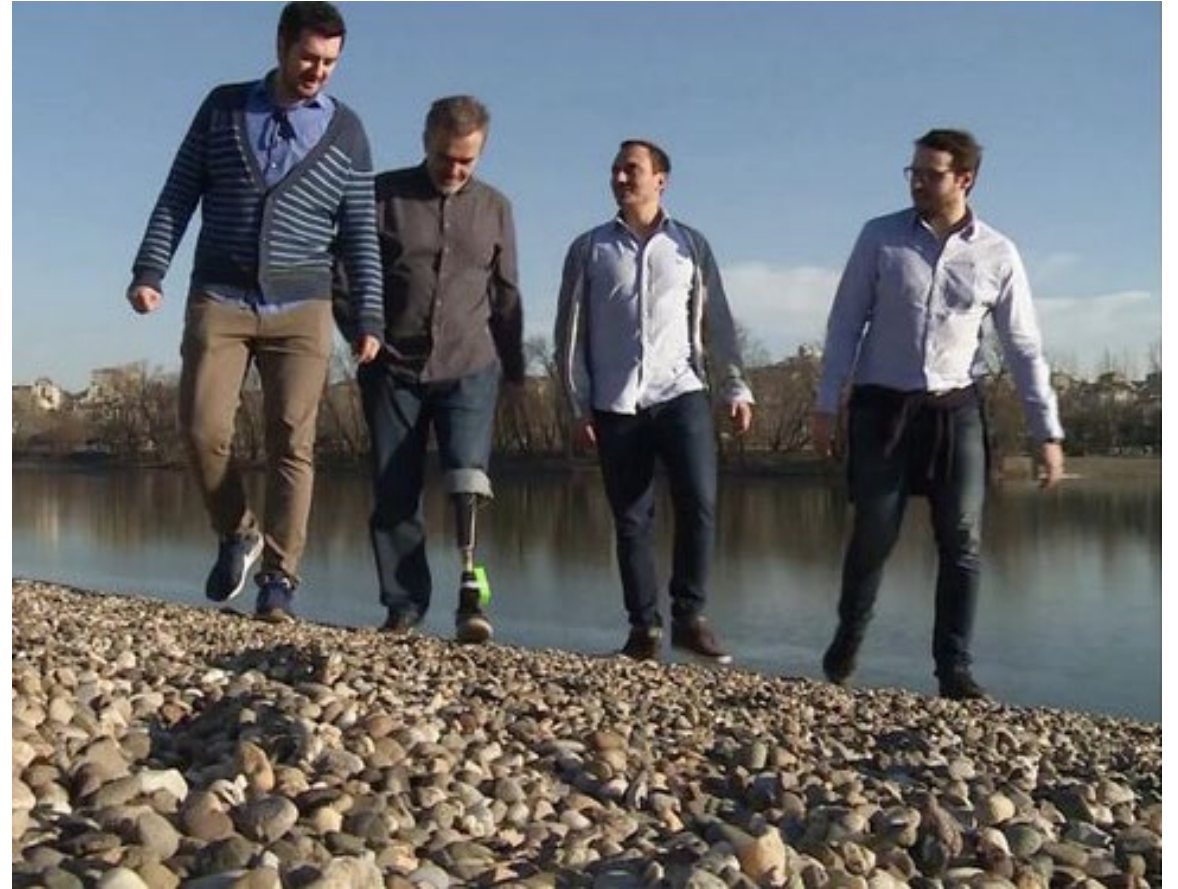

Prof. Stanisa Raspopovic, ETH Zürich

# Können Maschinen eine Persönlichkeit entwickeln? Kann man ihnen vertrauen?

## Künstliche Intelligenz und Robotik

- Lösungen für ein breites Spektrum von Problemen der Gesellschaft.
- Diskussion über ihren Einsatz, Nutzung und die ethische Dimension ist wichtig.

HuggieBot  
Dr. Alexis Block, ETH Zürich

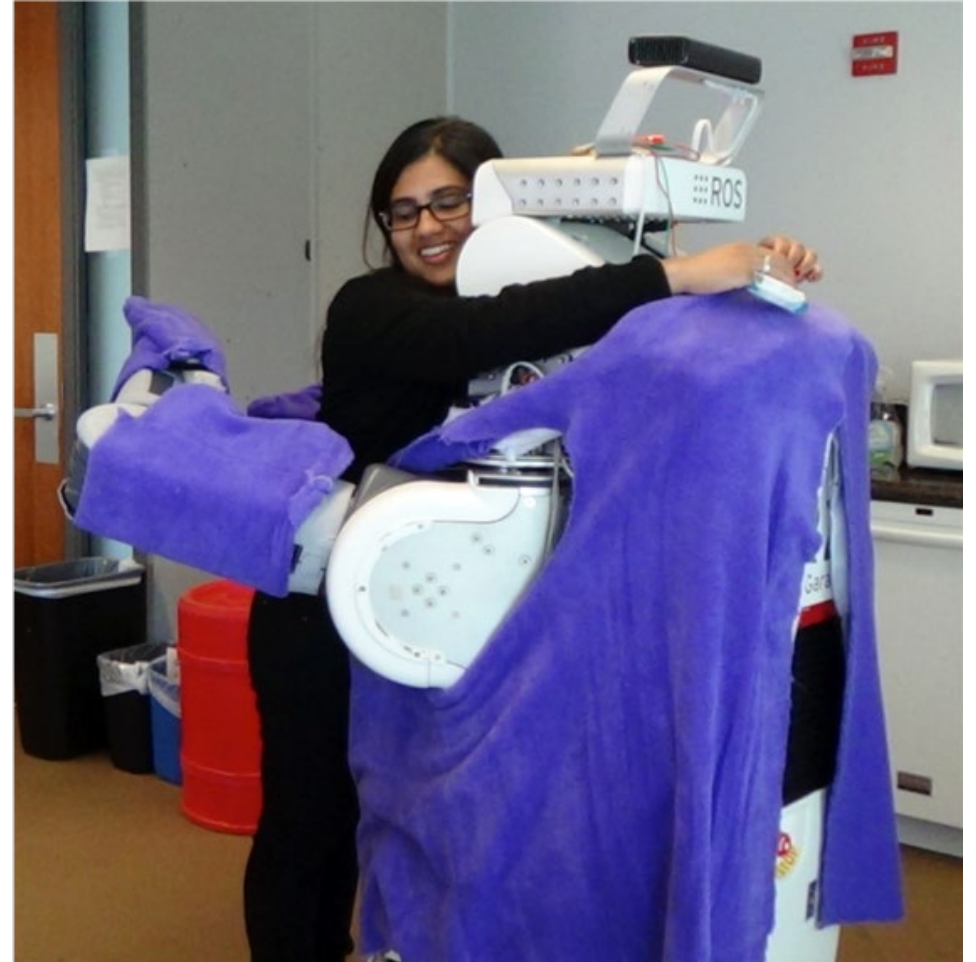

Thank you for your attention!

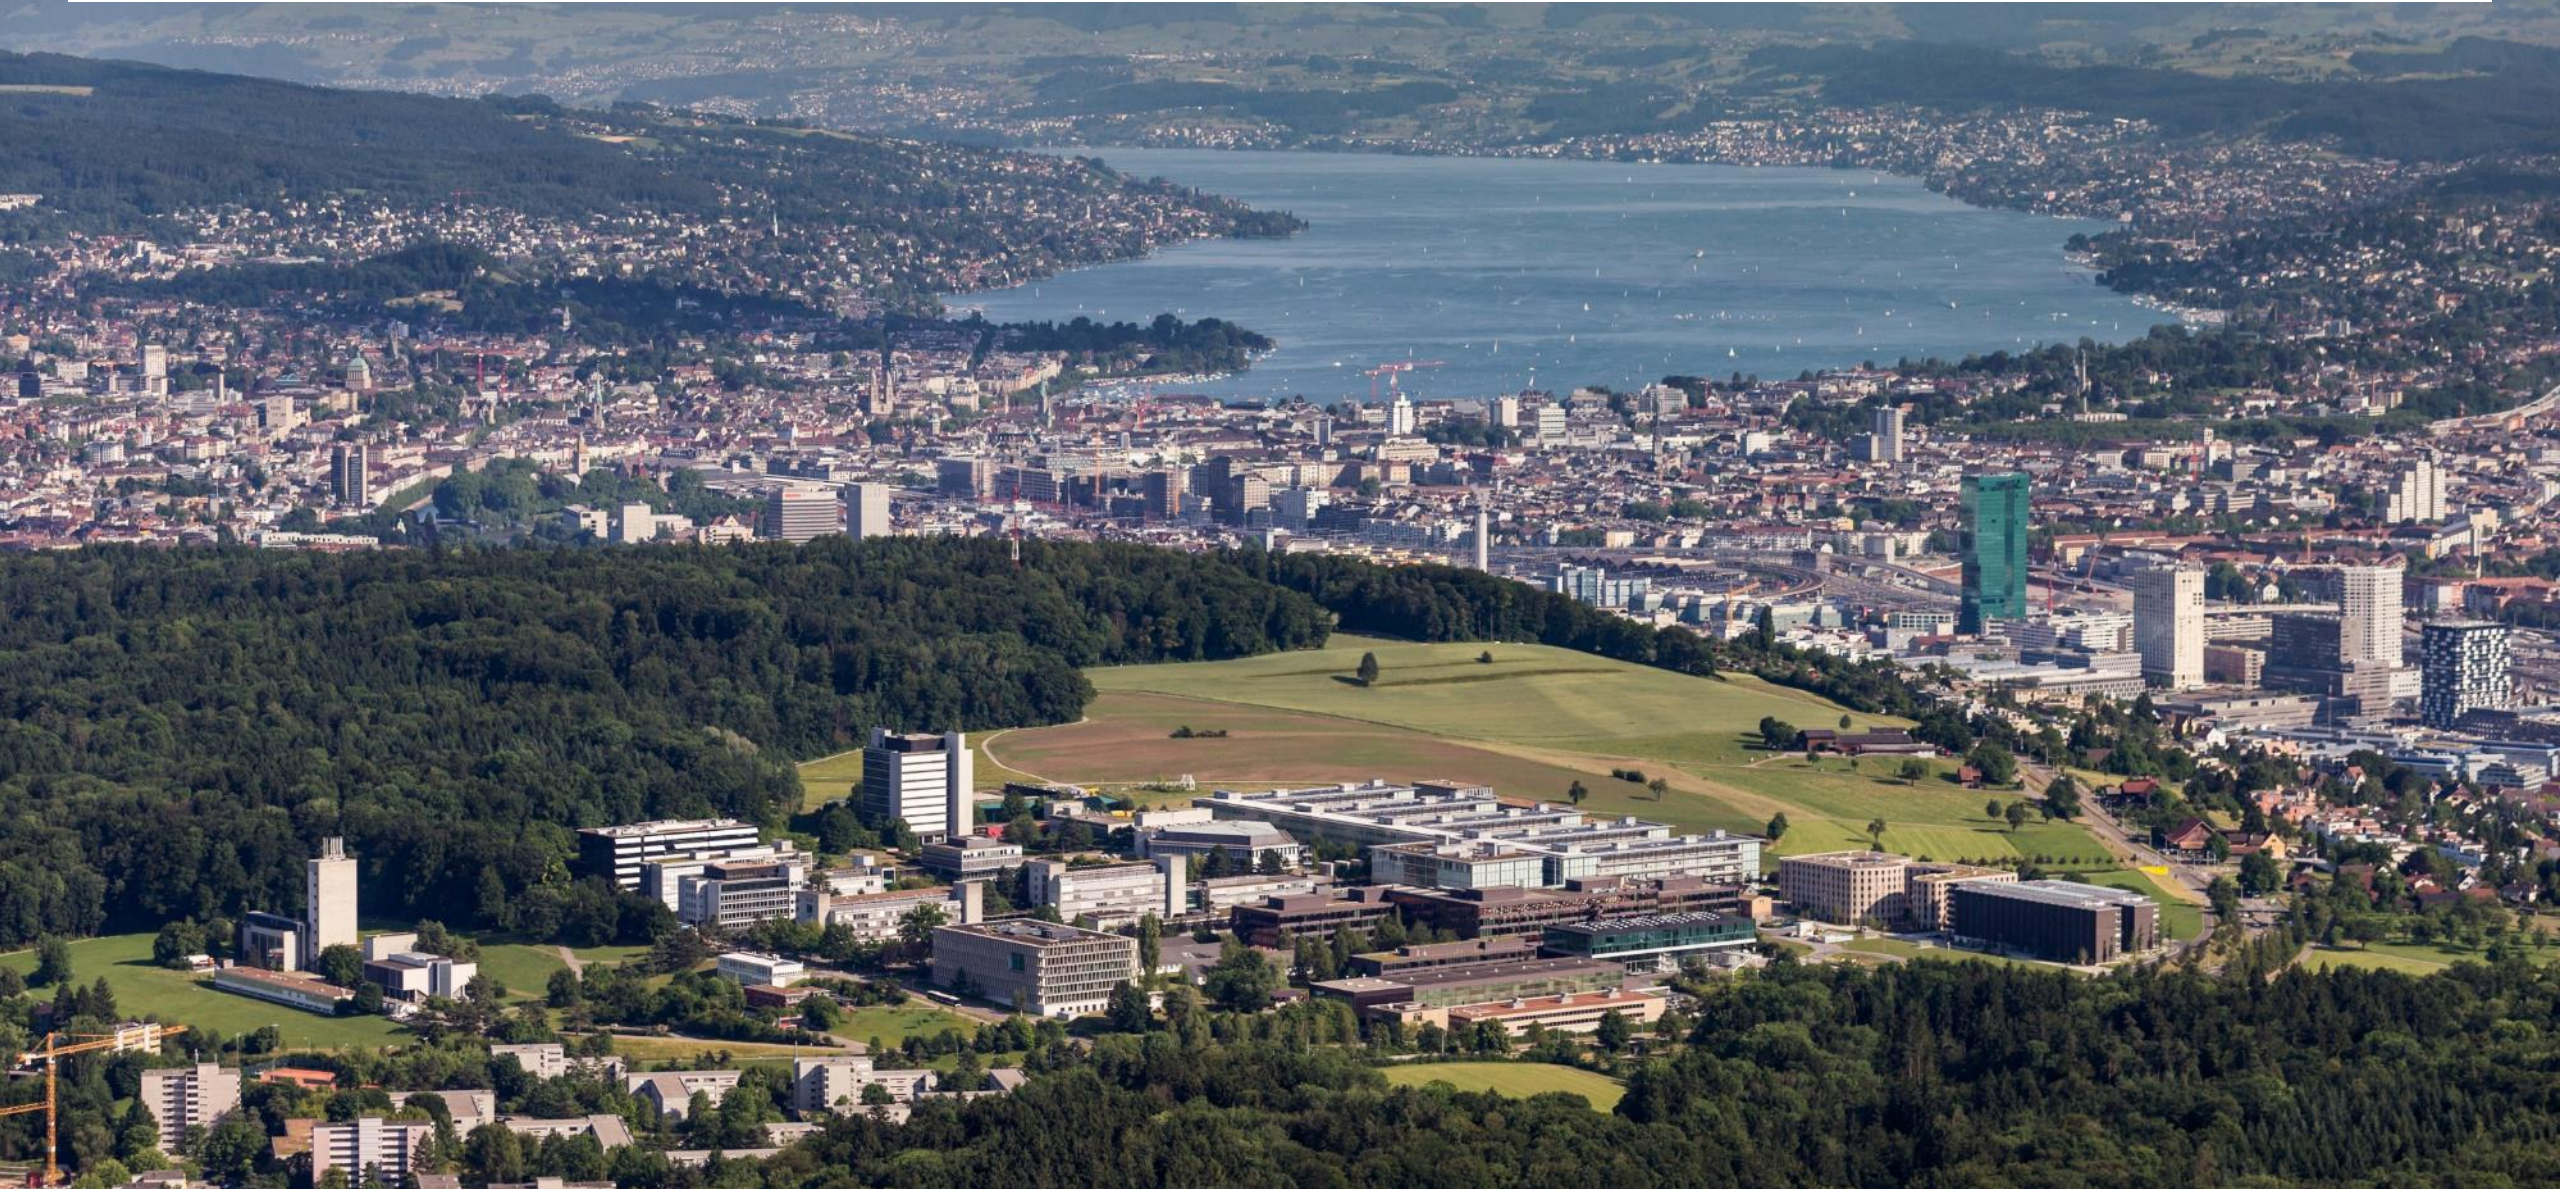

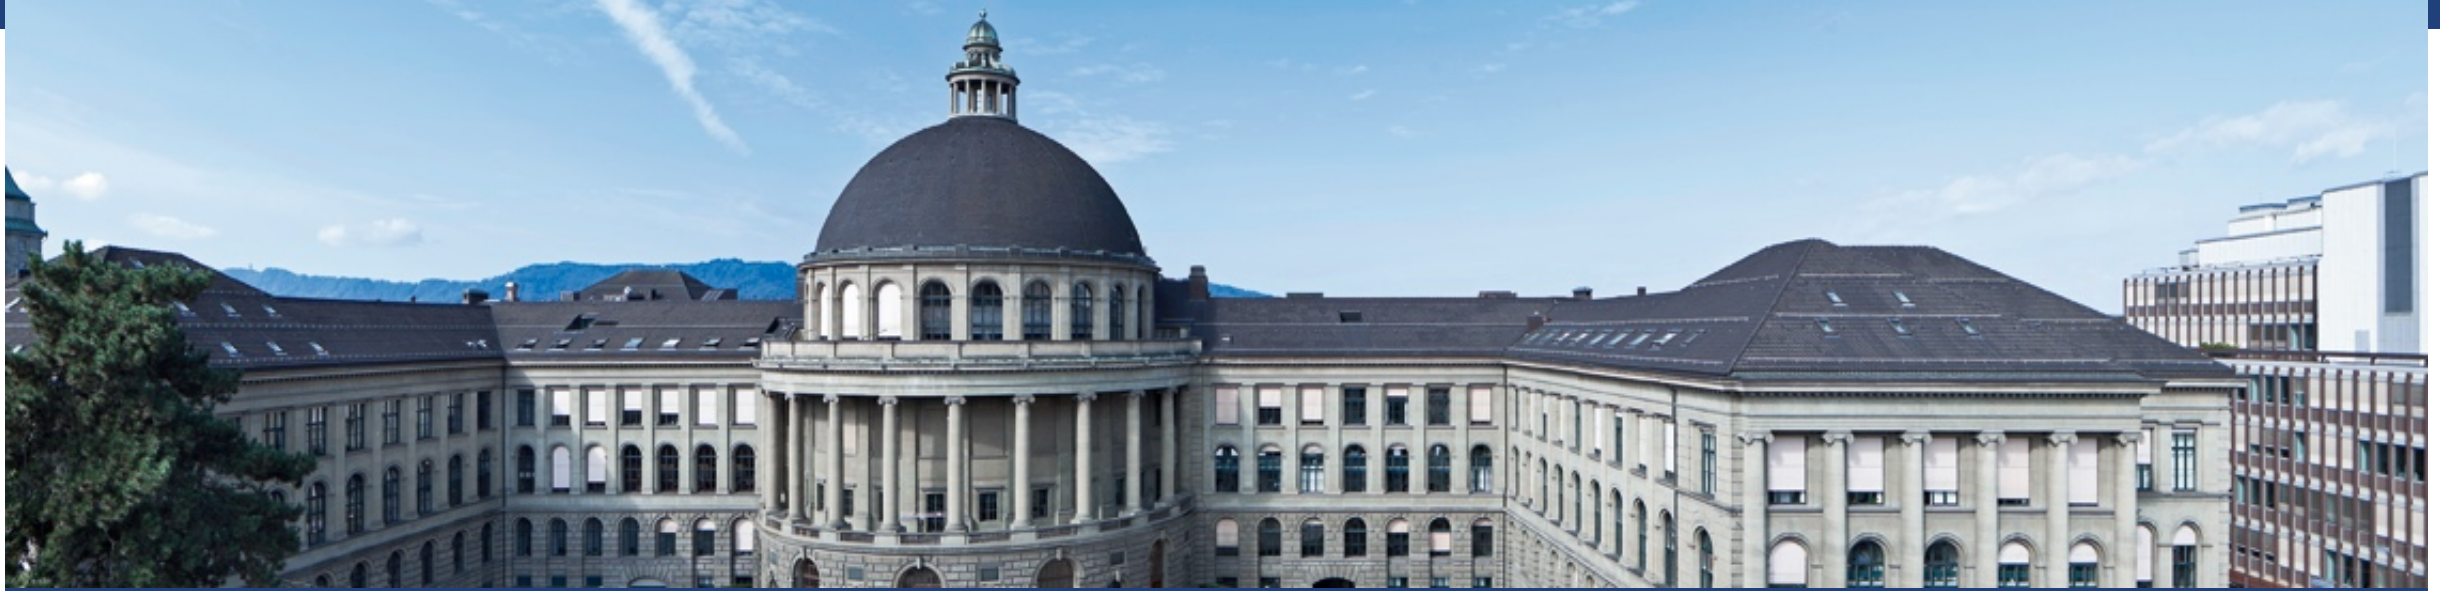

# Social Robots in Health Care- ethical challenges

Prof. Effy Vayena

Health Ethics and Policy Lab

[effy.vayena@hest.ethz.ch](mailto:effy.vayena@hest.ethz.ch)

[@EffyVayena](https://twitter.com/EffyVayena)

# Outline

- AI and Robots
- Hype and hope
  
- **Autonomy: consent and patient choice**
- **Human relationships**
- **Privacy**
- **Trust**
- **Disparities**

Figure 2. Sectors leading in AI adoption today

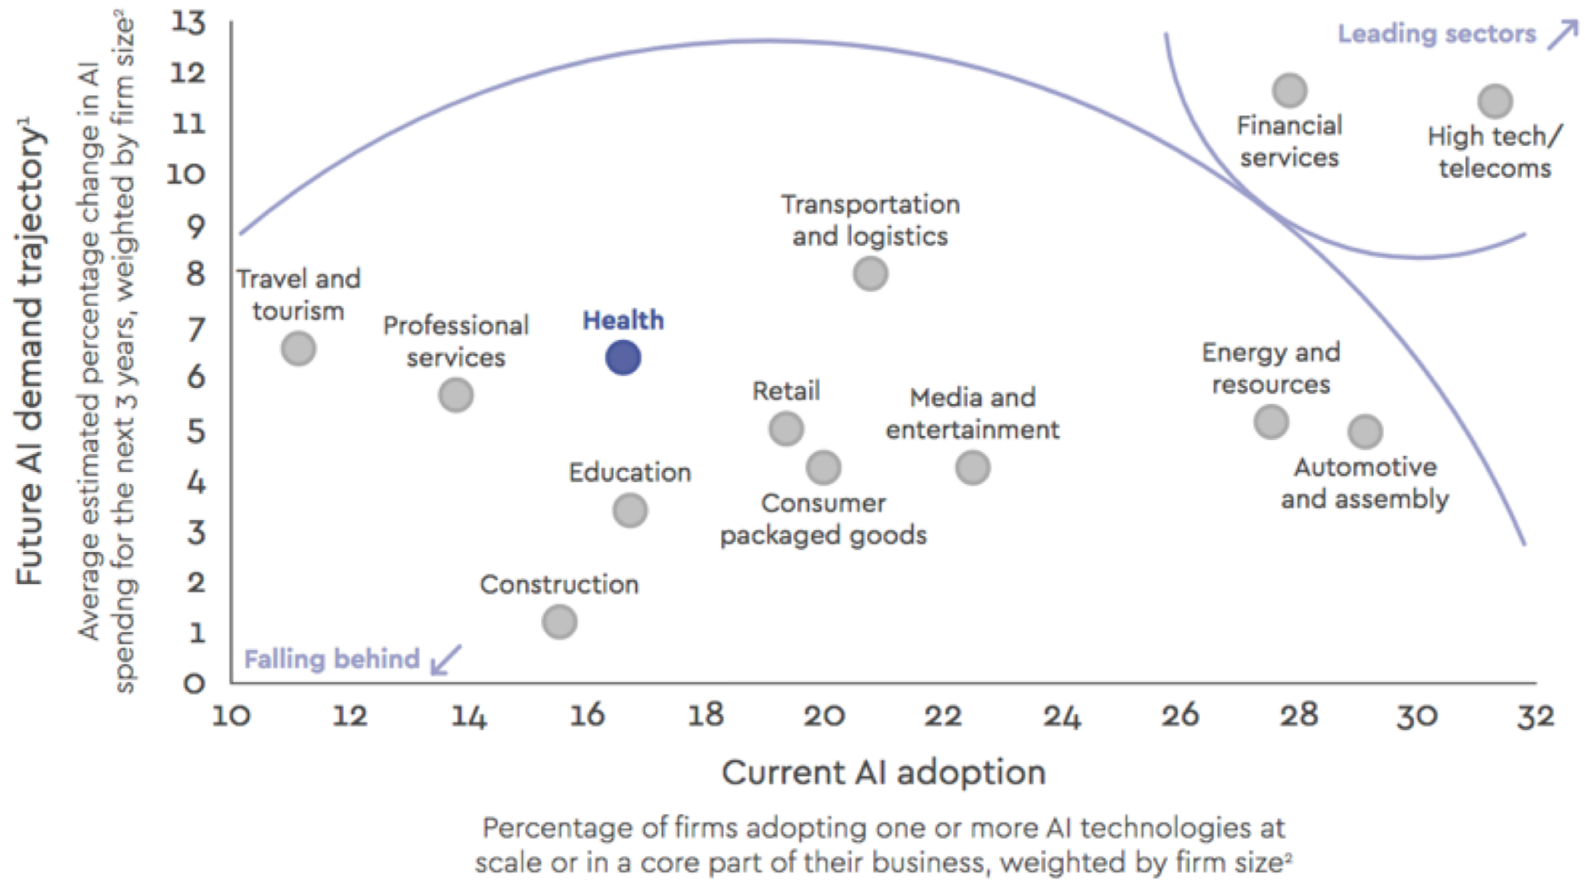

Our Rating of the Top 10 Technologies, Their Penetrance from Now to 2040

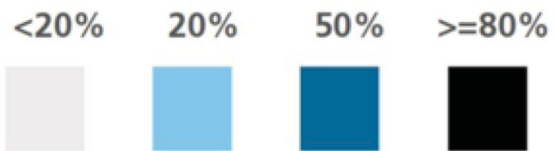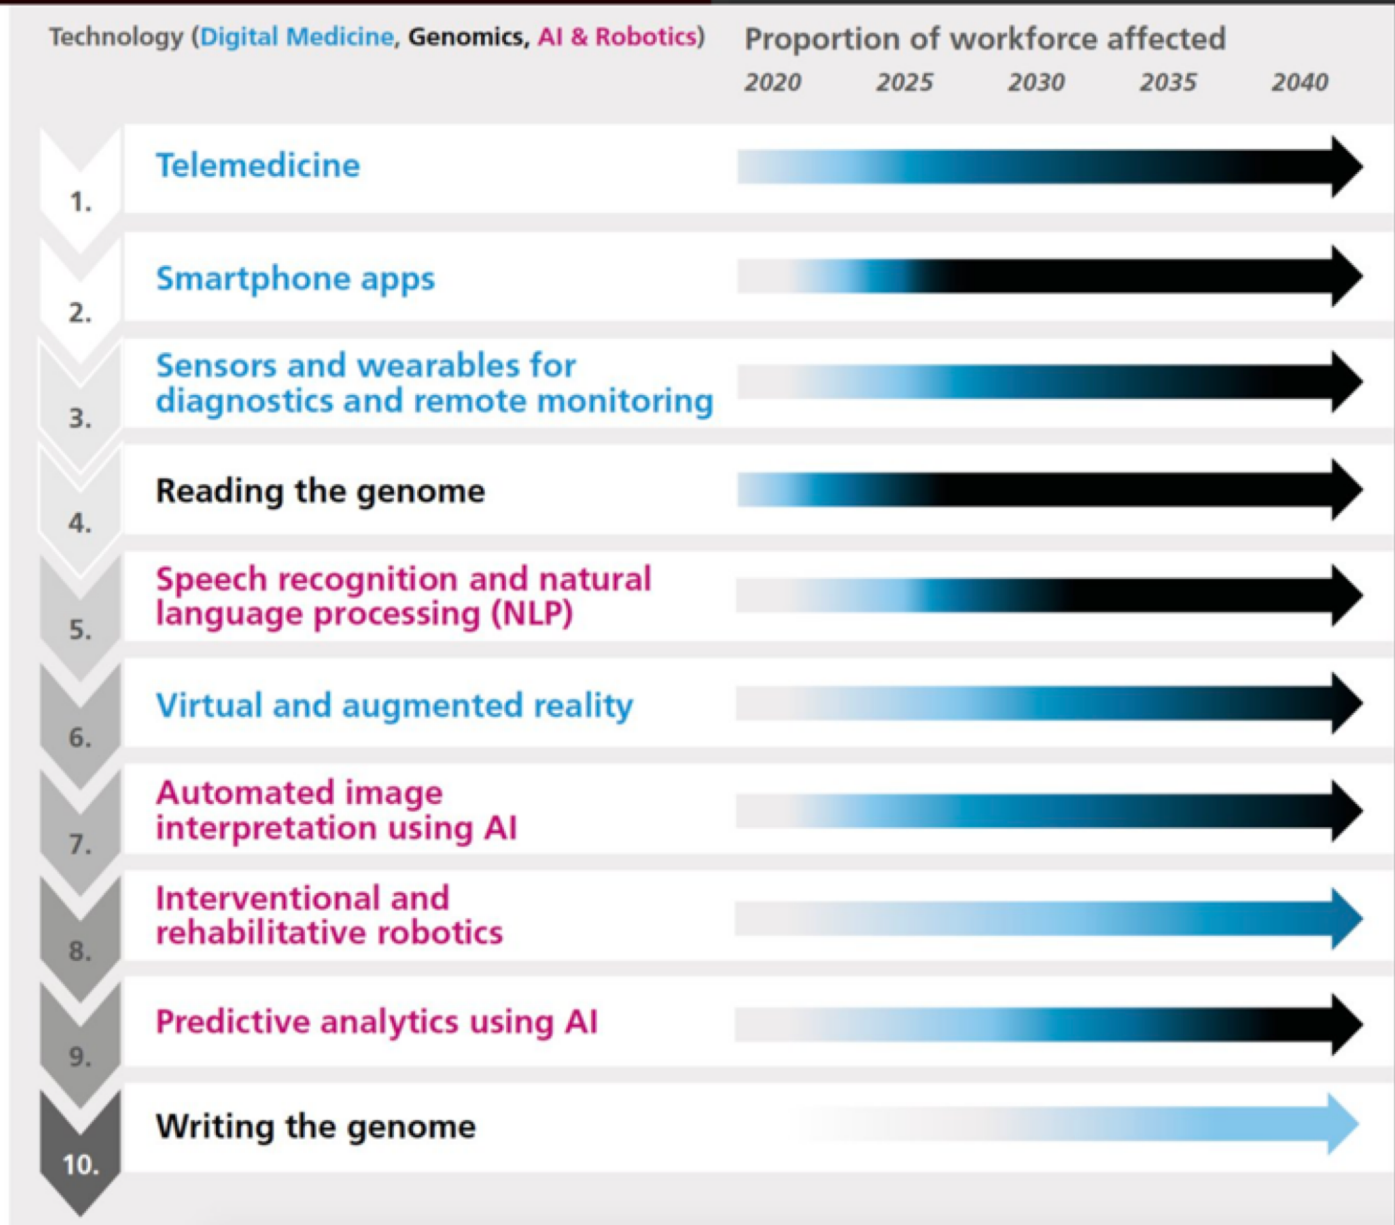



# Different types

**Robotic surgery** allowing more accurate, less invasive and remote interventions relying on the availability and assessment of vast amounts of data;

**Care and socially assistive robots** allowing to meet the expanding demands for long-term care from an ageing population affected by multi-morbidities;

**Rehabilitation systems** supporting the recovery of patients as well as their long-term treatment at home rather than at a healthcare facility;

**Training for health and care workers** offering support for continuous training and life-long learning initiatives.

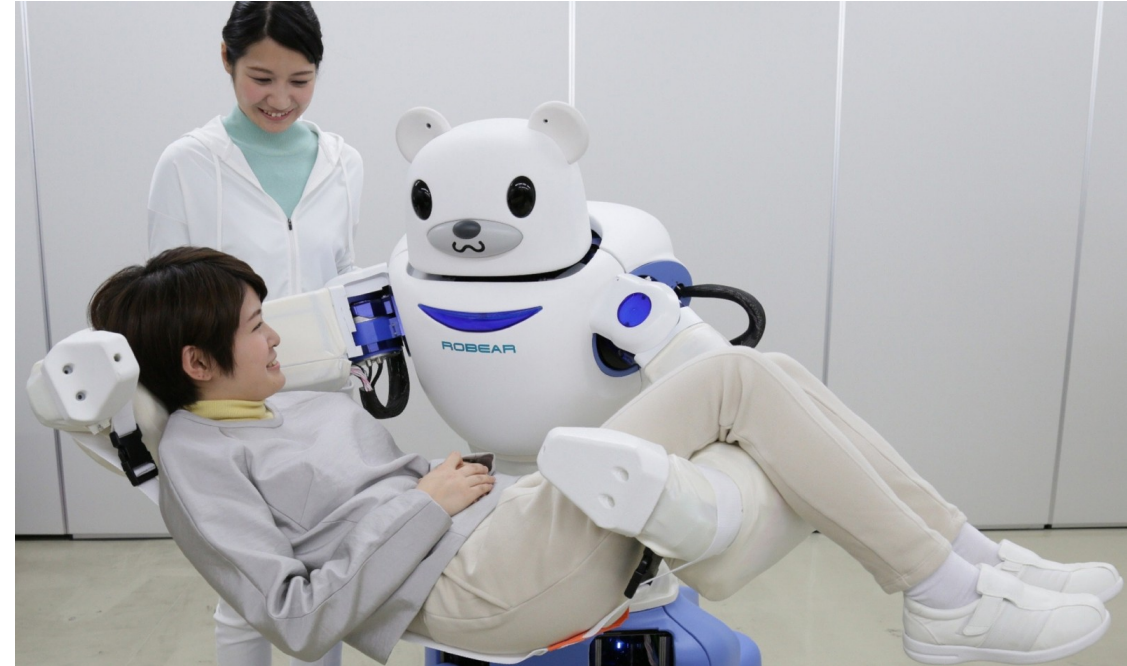

# “Autonomy” and control

- Autonomous robots
  - How much?
- Who controls what?
  - Patient
  - Health care professional
- Personal autonomy
  - Consent and deferring agency

# ARTIFICIAL INTELLIGENCE: YouGov Poll 2017

AI should/shouldn't be used for...

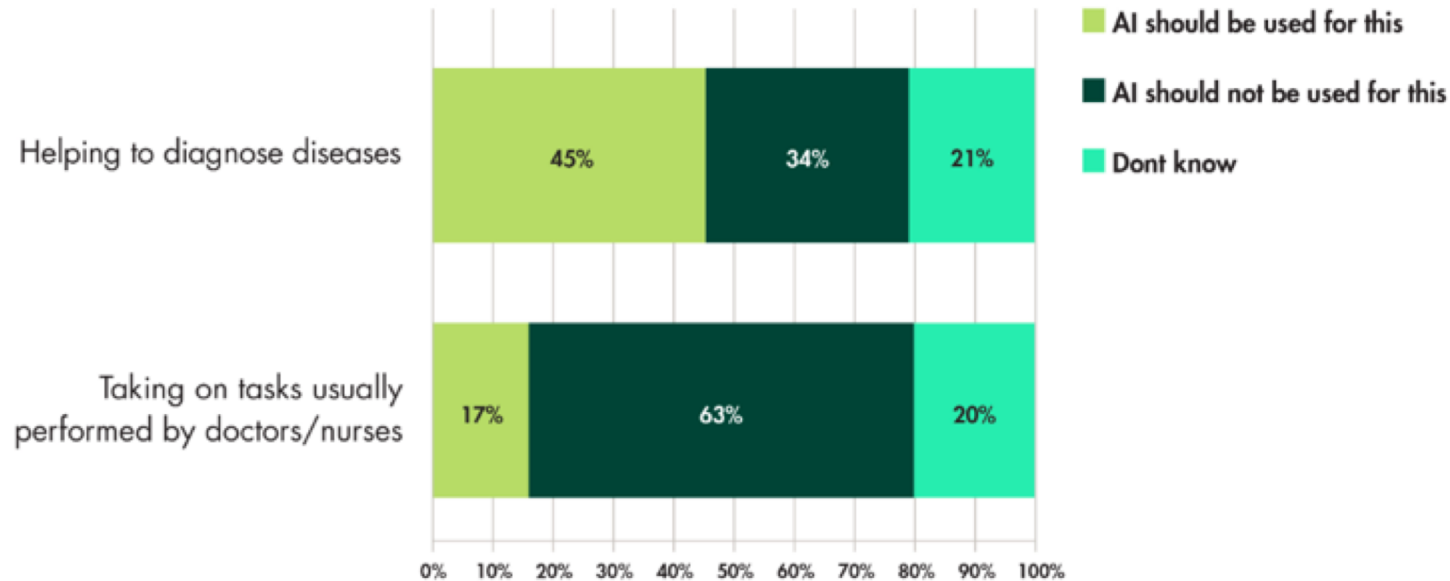

Many British people support the use of AI to help diagnose disease, but most don't think AI should be used for other tasks usually performed by doctors and nurses such as suggesting treatment

Total sample size was 2108 adults. Fieldwork was undertaken between 29th September - 2nd October 2017. The survey was carried out online. The figures have been weighted and are representative of all UK adults (aged 18+).

# Human relationships

- Dehumanizing (human-like)
- Objectifying
- Deception (bonding)
- Human-to-human interaction and moral boundaries
- Therapeutic relationships

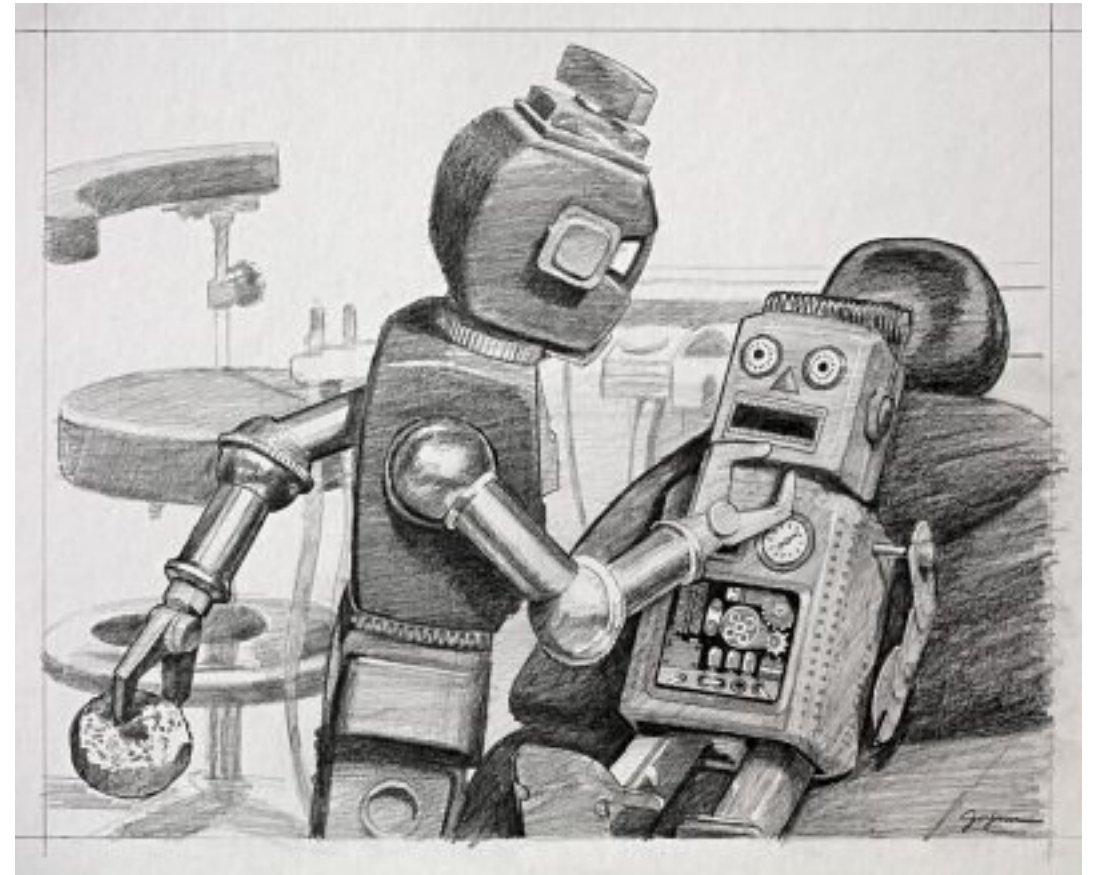

ERINE QUINTANA

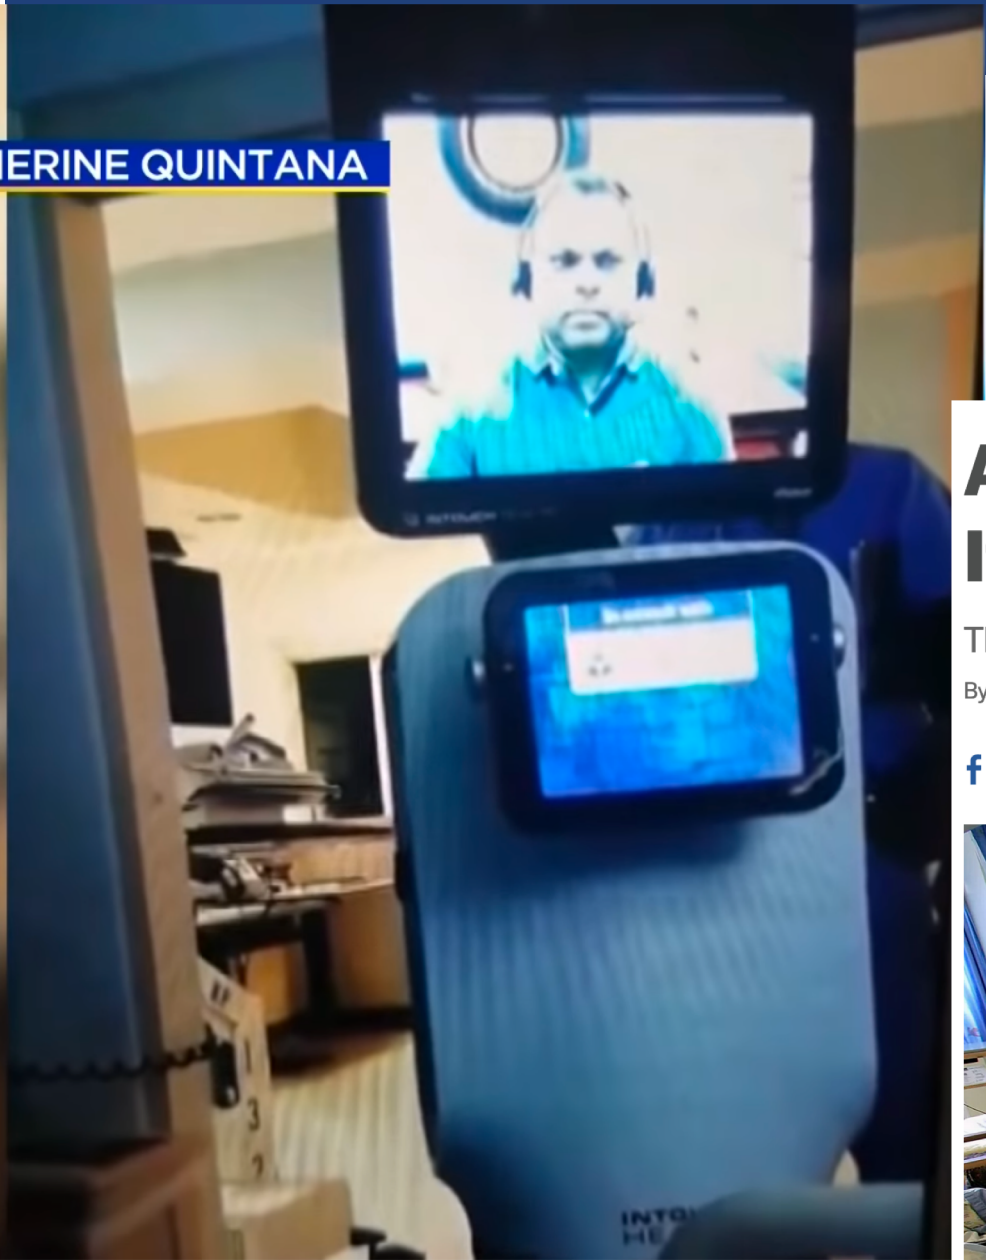

# A “robot” doctor told a patient he was dying. It might not be the last time.

This is the future of care for many patients with limited access.

By Haider Warraich | Mar 13, 2019, 12:30pm EDT

f t SHARE

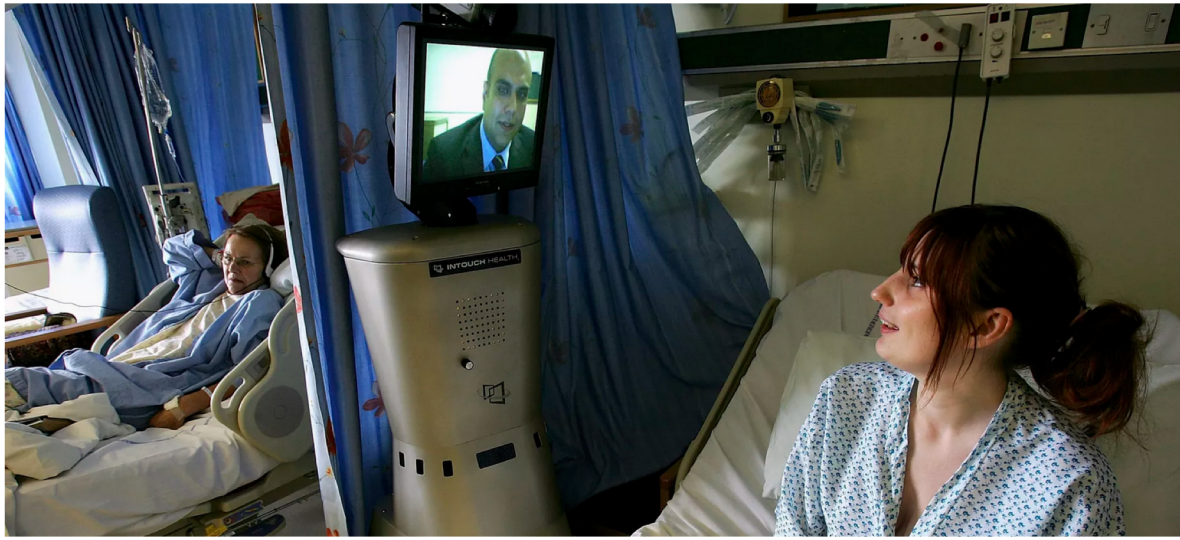

News > World > Americas

# Robot rolls into hospital ward and tells 97-year-old man he is dying

Family of Ernesto Quintana say terminal diagnosis should be given by ‘a human being and not a machine’

**Emma Snaitth** | Saturday 9 March 2019 19:15 | 16 comments

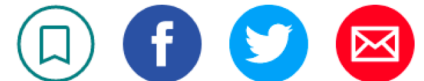

# Privacy

- Data collection
- Analytics and predictions
- Information flow
  
- Physical presence & autonomy
  
- Human-like robots
- Privacy of bystanders
- Connected systems

Informational privacy

Physical privacy

“Social privacy”

# Trust

- Transparency
  - Reliability
  - Over- trust
- Bias
- Accountability
- Liability

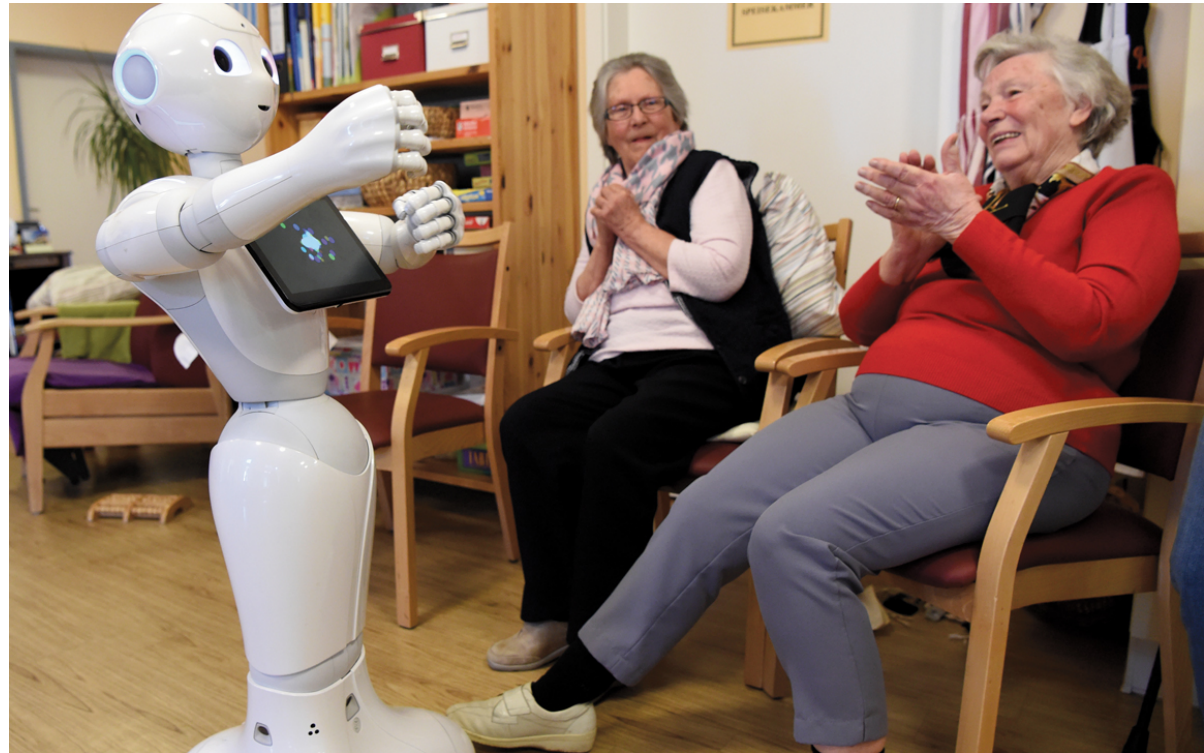



# Disparities

- Discrimination
- Access
- Fairness
- Distribution of benefit

"My fear is we will end up with what I've been calling a 'health care apartheid'. If we create algorithmic care and 'kiosk' it in some fashion — focusing on efficiency and throughput — the people who will end up having access and using it will be the ones who already lack privileges of various kinds"

Sonoo Thadaney Israni, Stanford University

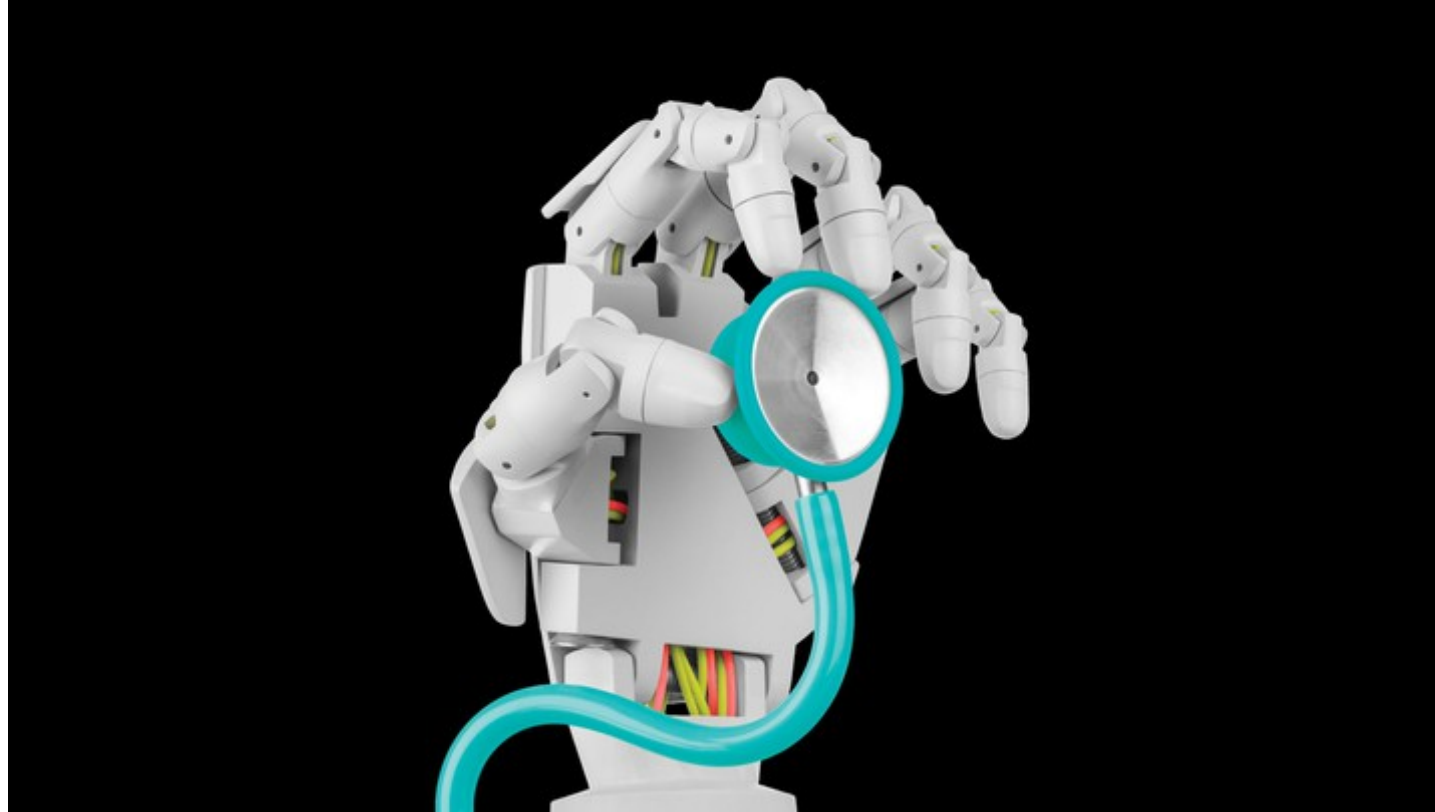

**“Where is everyone? What are they doing? Hello! It’s my body, you know! “Vergehes, NYT magazine 2018**

# THANK YOU!!

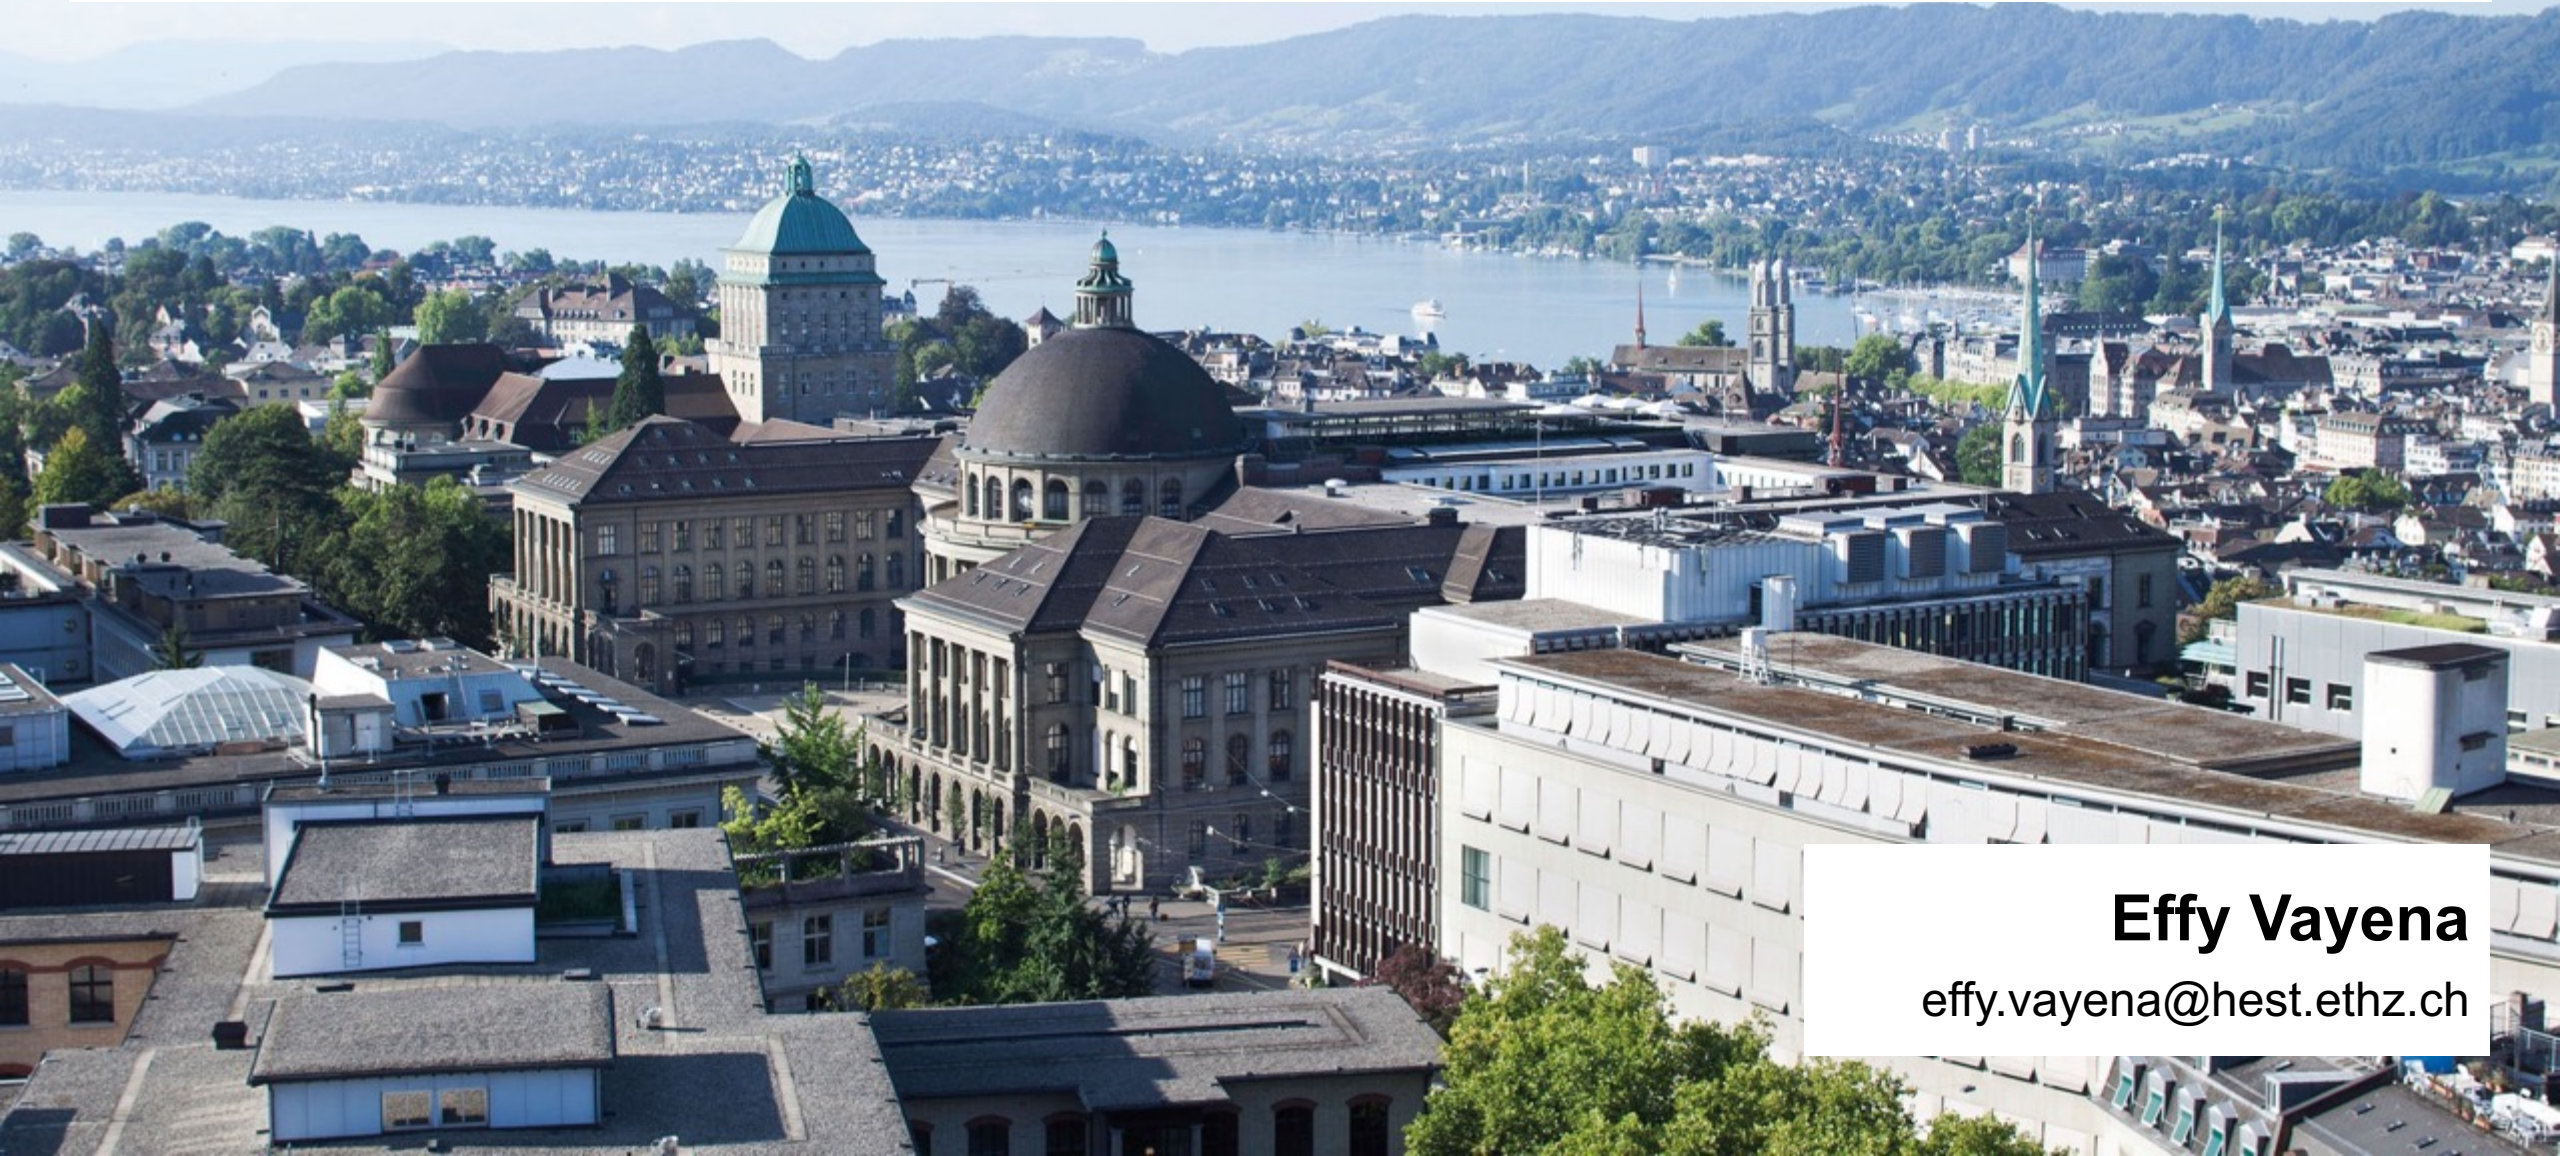

**Effy Vayena**

[effy.vayena@hest.ethz.ch](mailto:effy.vayena@hest.ethz.ch)

Faculty of Health – Medicine Department  
Didactics & Educational Research in Healthcare

UNI – WH.DE/

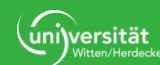

# Pflegeszenarien in einer digitalen Welt

## Auf dem Weg in eine Utopie oder Dystopie?

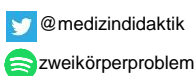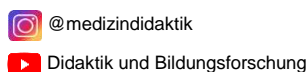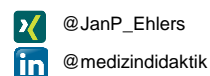

## Digitale Transformation

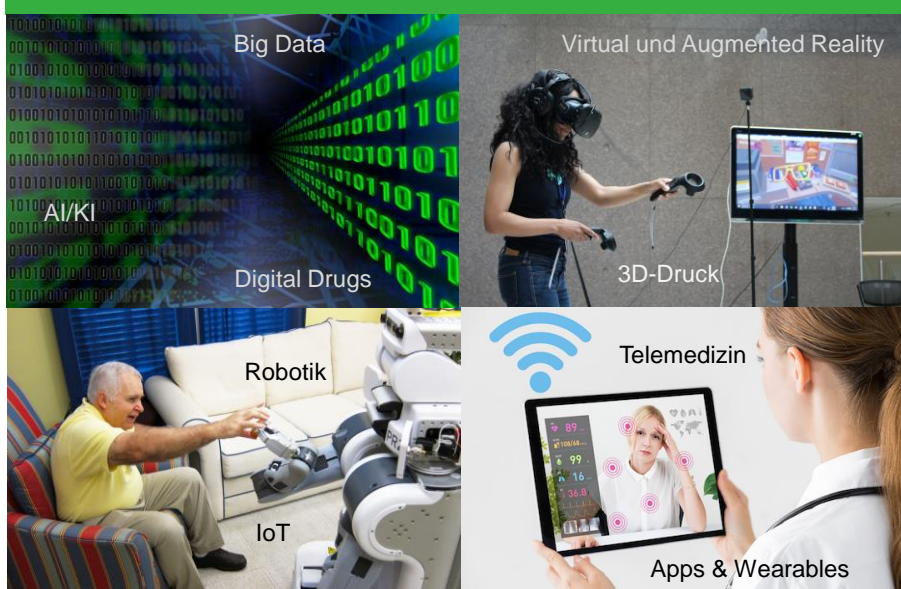

## Digitale Transformation

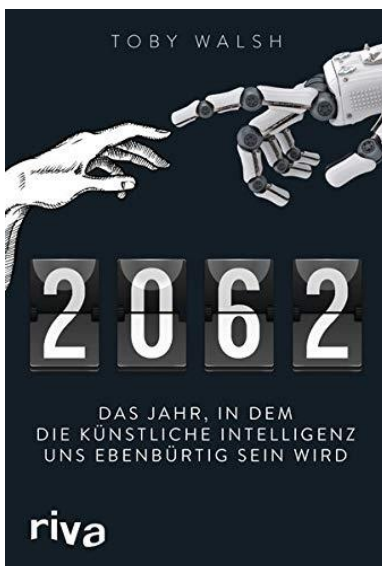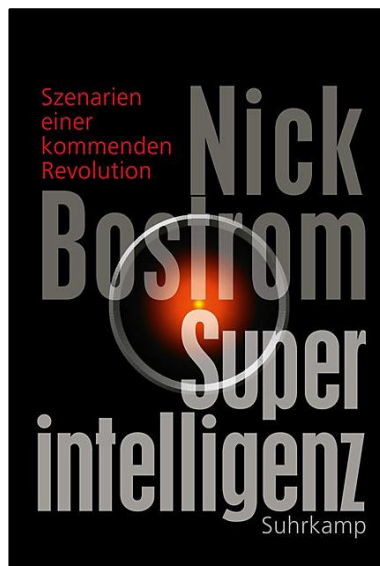

KLUG P (2018): The Debate about Responsible Artificial Intelligence in the European Union: Utopian or Dystopian?  
BA Thesis Faculty of Behavioral, Management and Social Science, University of Twente

## Vorstellungen der Zukunft

### Utopie

Fiktive Gesellschaftsordnung, meist positiv.

- **Frieden und Harmonie**
- Lebensverbesserung
- Revitalisierung der Politik
- Kontrolle von Natur und Technologie
- Würde, Privatsphäre
- Unparteilichkeit, Gleichheit
- Freiheit, Autonomie
- Selbstbestimmung
- Persönliche Erfüllung
- Fortschritt
- Individuelle und gesellschaftliche Erlösung
- Umwelterhaltung

### Dystopie

Gesellschaft, die sich zum Negativen entwickelt

- **Krieg und Chaos**
- Armut
- Macht und Kontrolle
- Verlust der Kontrolle über die Technologie
- Unterdrückung
- Massenüberwachung
- Soziale und wirtschaftliche Ungleichheiten
- Dominanz, Diskriminierung
- Unterwerfung, Sklaverei
- Umweltzerstörung
- Aufhebung der Rechte

# Zukunft der Gesundheitsversorgung

|                                                                                                                                                                                                                                                                                                                                                                              |                                                                                                                                                                                                                                                                                                                                                                     |
|------------------------------------------------------------------------------------------------------------------------------------------------------------------------------------------------------------------------------------------------------------------------------------------------------------------------------------------------------------------------------|---------------------------------------------------------------------------------------------------------------------------------------------------------------------------------------------------------------------------------------------------------------------------------------------------------------------------------------------------------------------|
| <h2 style="margin: 0;">Utopie</h2> <ul style="list-style-type: none"> <li>Miteinander von Mensch und Technik</li> <li>Antworten auf Pflegekräftemangel und Überalterung</li> <li>Menschen konzentriert auf soziale Interaktion</li> <li>Geringere Fehleranfälligkeit</li> <li>Aufbau einer neuen, friedlichen Gesellschaftsform</li> <li>„<b>Alles wird gut!</b>“</li> </ul> | <h2 style="margin: 0;">Dystopie</h2> <ul style="list-style-type: none"> <li>Überwachung</li> <li>Entmenschlichung</li> <li>Entsolidarisierung/ Zweiklassenpflege</li> <li>Internationale Datenkraken</li> <li>Energieverbrauch / Klimakatastrophe</li> <li>Arbeits- und Nutzlosigkeit von Menschen</li> <li>„<b>Wir haben es ja schon immer geahnt!</b>“</li> </ul> |
|------------------------------------------------------------------------------------------------------------------------------------------------------------------------------------------------------------------------------------------------------------------------------------------------------------------------------------------------------------------------------|---------------------------------------------------------------------------------------------------------------------------------------------------------------------------------------------------------------------------------------------------------------------------------------------------------------------------------------------------------------------|

# Technisierung der Pflege

Foresight-Studie „Digitale Arbeitswelt“ (2016) für das Bundesministerium für Arbeit und Soziales

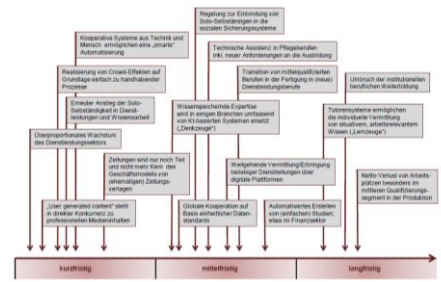

Abb. 1 Meilensteine in der Entwicklung der digitalen Arbeit auf Basis einer umfassenden und konsolidierten Analyse für die Branchen Produktion, Dienstleistungen und Medien

„Zeitgleich werden für **standardisierbare, manuelle Arbeiten zunehmend robotische Lösungen erwartet**. Analog zur Produktion werden **assistive Systeme** mittelfristig in Dienstleistungsbereichen zur Verfügung stehen, die bisher durch einen vergleichsweise niedrigen Technisierungsgrad gekennzeichnet waren, so etwa in der Reinigung oder der **Altenpflege**.“

„Unbestritten ist jedoch, dass die Technisierung der Pflege zu einer zusätzlichen **Qualifizierung** der in diesem Bereich Tätigen führen wird, die mit einer gewissen Wahrscheinlichkeit auch in einer **allgemeinen Aufwertung**, beispielsweise des Pflegeberufs, und der damit verbundenen **Entlohnung** Ausdruck finden wird.“

## EHF: Scenarios for health in 2037

### Scenario 1: The Future is Local

Lokale Verantwortung für Gesunderhaltung mit Risiko der eingeschränkten Freiheiten.

### Scenario 2: Your Health, Your Responsibility

Selbstverantwortung mit Belohnungen aber Stigmatisierung und beschränktem Zugang zu Unterstützung.

### Scenario 3: Technology Delivers

Staatliche Technologiestrategie mit Gentests, BigData und HighTech Therapien, Patien\*innen werden Kund\*innen.

[https://www.ehfg.org/fileadmin/downloads/13-0-health-futures/EHFG\\_Health\\_Futures\\_Project\\_Report.pdf](https://www.ehfg.org/fileadmin/downloads/13-0-health-futures/EHFG_Health_Futures_Project_Report.pdf)

LEHOUX P and GRIMARD D (2018): When robots care: Public deliberations on how technology and humans may support independent living for older adults. Social Science & Medicine 211, 330-337

## Unterstützung im Alter

| Roboter                                                                     | Menschen                                                           |
|-----------------------------------------------------------------------------|--------------------------------------------------------------------|
| <b>Monitoring und Sicherheit</b>                                            |                                                                    |
| 24/7 verfügbar, Datenspeicherung, mobile Assistenz                          | Physische Unversehrtheit, Anpassungsfähigkeit, Kontext-Erfahrungen |
| <b>Aktivitäten des täglichen Lebens</b>                                     |                                                                    |
| Erinnerung an Medikamente, Unterstützung beim Anziehen/Hygiene              | Wichtiger menschlicher Kontakt, Respekt der menschlichen Würde     |
| Fehleranfälligkeit, Kosten, Kontrollverlust, negative Gesundheitsauswirkung | Abhängigkeit von (schlechten) Menschen, geteilte Aufmerksamkeit    |
| <b>Soziale Aktivitäten &amp; emotionale Stütze</b>                          |                                                                    |
| Zeit für soziale Aktivitäten, Kommunikation mit Angehörigen, Emotionen +/-  | Freundlichkeit & Wärme, Erfahrungsaustausch, Vertrauen, Beziehung  |
| Entmenschlichung, Automatisierung, Isolation, Mobilitätsverlust             |                                                                    |

## Spannungsfeld

„Robotic Care“

„Analog Care“

„Smart Care“

„Deep Care“

## 1. „Robotic Care“

Hauptmerkmal: Ersetzen menschlicher Pflege durch Technologie

Treiber: Preis

Fachkräfte: Nicht weiter in der Pflege benötigt

Patient\*innen: Pflege und Heilung

Pflegende: Technologie: AI, Roboter, IoT

Gesellschaft: Entmenschlichung

Gewinne: Einfach skalierbare Versorgung

Risiken: Technologiedominanz, Überwachung

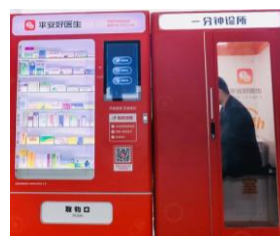



## 2. „Analog Care“

Hauptmerkmal: Technologie verdammen

Treiber: Furcht

Fachkräfte: Überarbeitet

Patient\*innen: (statusabhängig) Unterversorgt

Pflegende: Menschen

Gesellschaft: Rückwärtsgerichtet

Gewinne: Vertrautheit

Risiken: Abgehängt werden

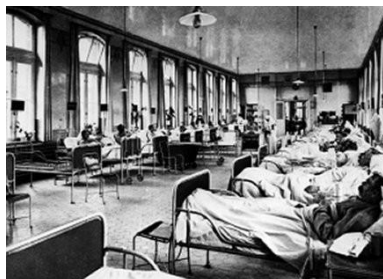

## 3. „Smart Care“

Hauptmerkmal: Menschliche Pflege unterstützen

Treiber: Technologie

Fachkräfte: Überfordert

Patient\*innen: Pflege und Prävention

Pflegende: Menschen

Gesellschaft: Entsolidarisierung

Gewinne: High-Tech Versorgung

Risiken: Zweiklassen-Versorgung

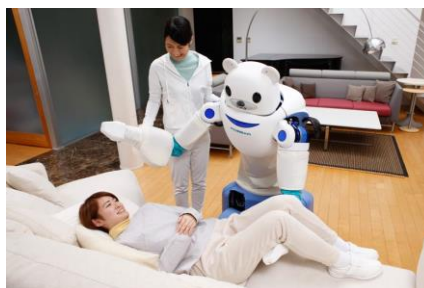

## 4. „Deep Care“

Hauptmerkmal: Menschliche Pflege verstärken

Treiber: Werte (Anspruch und Würde)

Fachkräfte: Gestärkt

Patient\*innen: Gestärkt

Pflegende: Teams

Gesellschaft: Zukunftsgerichtet

Gewinne: Menschlichkeit und High-Tech

Risiken: Digital Divide

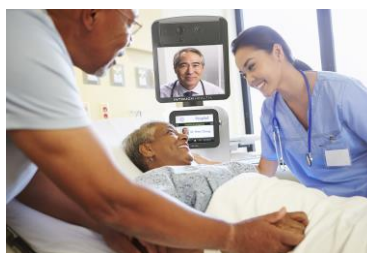

## Vier Szenarien

|               | Robotic Care       | Analog Care           | Smart Care             | Deep Care                   |
|---------------|--------------------|-----------------------|------------------------|-----------------------------|
| Merkmal       | Menschen ersetzen  | Technologie verdammen | Menschen unterstützen  | Menschliche Pflege stärken  |
| Treiber       | Preis              | Furcht                | Technologie            | Werte                       |
| Fachkräfte    | überflüssig        | überarbeitet          | überfordert            | gestärkt                    |
| Patient*innen | Heilung            | unterversorgt         | Prävention             | gestärkt                    |
| Pflegende     | Technologie        | Menschen              | Menschen               | Teams                       |
| Gesellschaft  | entmenschlicht     | rückwärtsgerichtet    | entsolidarisiert       | Zukunftsgerichtet           |
| Gewinne       | Skalierbare Kosten | Vertrautheit          | HighTech-Versorgung    | Menschlichkeit und HighTech |
| Risiken       | Überwachung        | Abgehängt werden      | Zweiklassen-Versorgung | Digitale Divide             |

## Herausforderungen

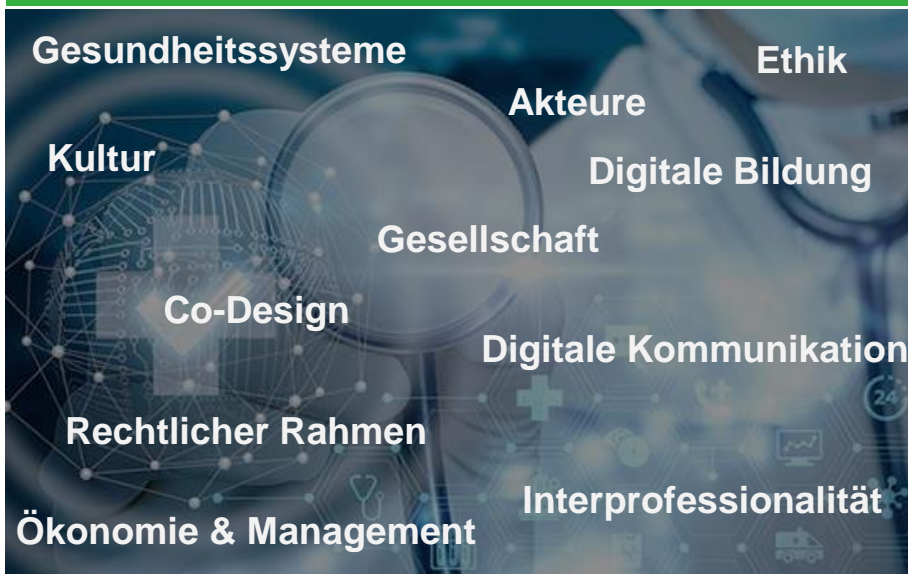

## Gruppenarbeit

- Dialogrunde 1: Pflegeszenarien 2025
- Dialogrunde 2: Entwicklung eines bevorzugten Szenarios
- Dialogrunde 3: Welche Schritte braucht es zur Umsetzung?

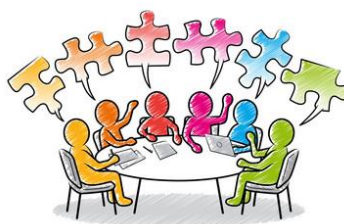

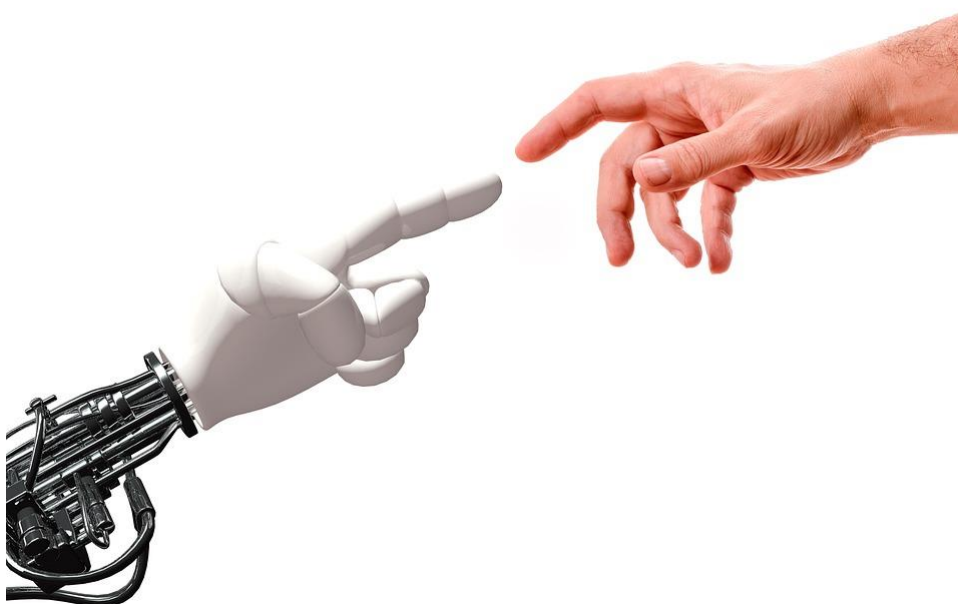

 @medizindidaktik  
 zweikörperproblem

 @medizindidaktik  
 Didaktik und Bildungsforschung

 @JanP\_Ehlers  
 @medizindidaktik

# Emotionen und AI – wie Maschinen lernen, menschliche Emotionen zu deuten

Wie werden Maschinen mit Schwerpunkt  
auf sozialer Interaktion entwickelt?  
Wie gestaltet sich die Zusammenarbeit  
zwischen Entwicklern, Psychologen und Nutzern?

Oliver Korn, Hochschule Offenburg, 13.02.2020  
Careum Dialog 2020. Zürich, 13.02.-14.02.2020  
Talk to me. Soziale Roboter im Gesundheitswesen

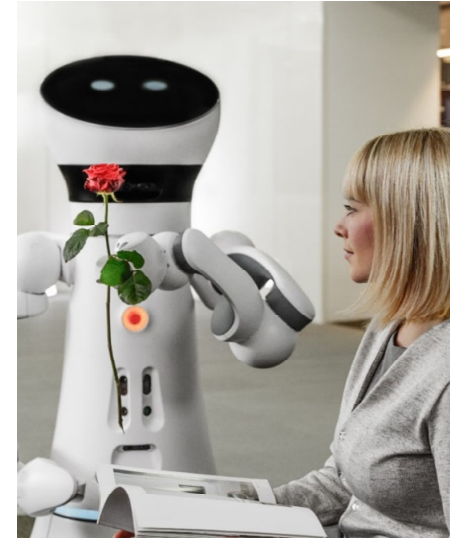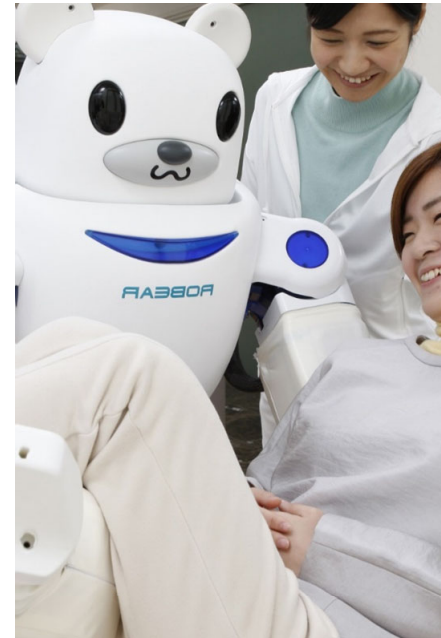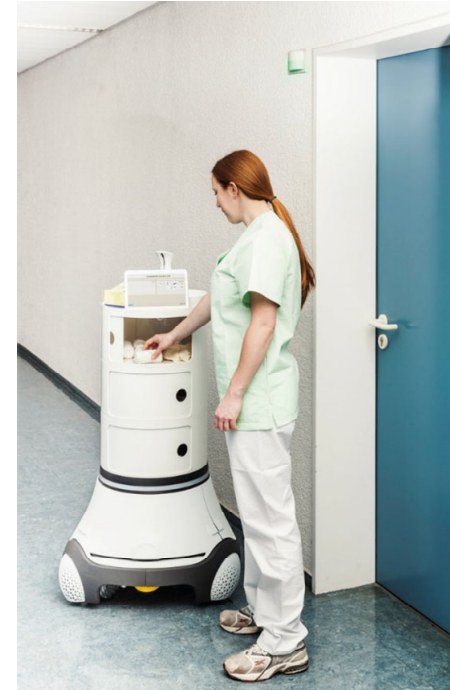

# Soziale Roboter und Künstliche Intelligenz: Wo liegen die Potenziale?

- Kinder und die meisten Erwachsenen übertreffen sich darin, sozialen Robotern kognitive und emotionale Fähigkeiten zuzuschreiben, die diese eigentlich nicht haben oder demonstrieren.

In from three to eight years we will have a machine with the general intelligence of an average human being. I mean a machine that will be able to read Shakespeare [...] tell a joke, have a fight.

Marvin Minsky  
*Time Magazine* (1970)

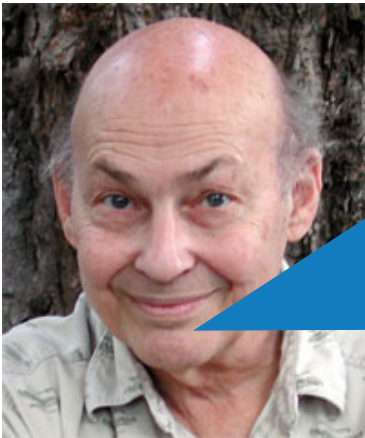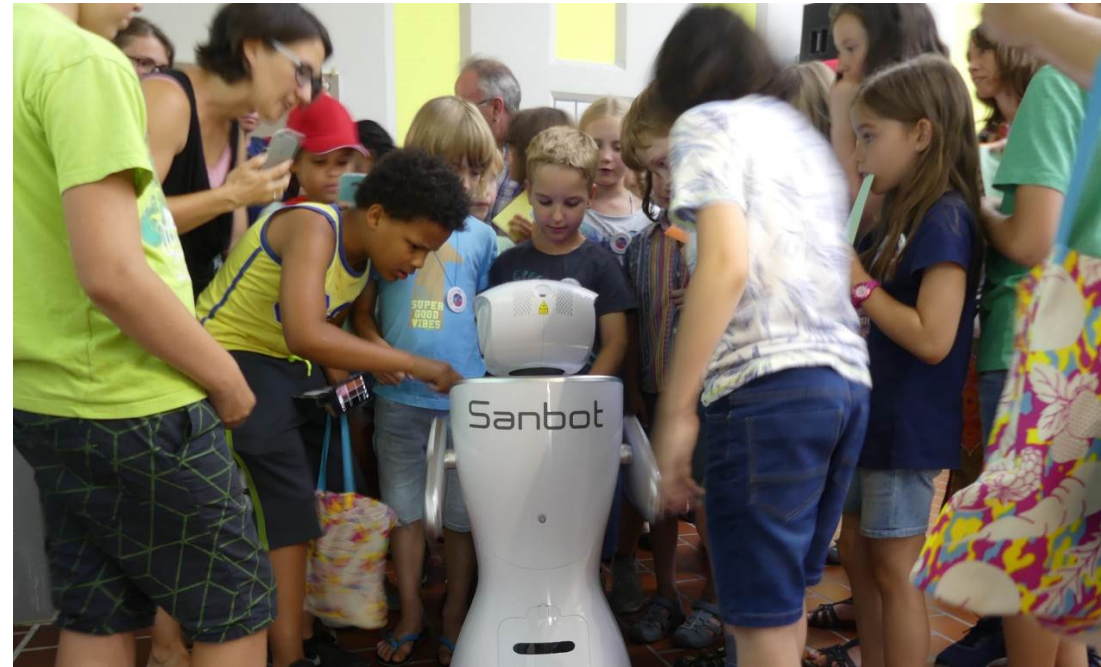

Unser Robot Sanbot interagiert mit Kindern am Hochschultag der Hochschule Offenburg.

# Wann sind Roboter „sozial“?

- **Industrieroboter** und auch **kollaborative Roboter** sind für eingeschränkte Aufgaben konzipiert – der Fokus liegt auf der Arbeit, nicht dem Menschen.
- Im Gegensatz dazu werden **Serviceroboter** definiert als Roboter, die „für den Menschen nützliche Aufgaben ausführen, die physische Aufgaben unterstützen, wie z.B. Menschen zu helfen, sich zu bewegen“ (ISO 8373:2012).
- **Soziale Roboter** sind zudem dafür ausgelegt, mit Personen zu **kommunizieren**.
- Sie interagieren und kommunizieren mit Menschen (oder anderen Robotern) und befolgen hierbei **soziale Verhaltensweisen und Regeln**.
- Erfolgreiche Kommunikation setzt ein Mindestmaß an **Empathie** (Einfühlungsvermögen) voraus.

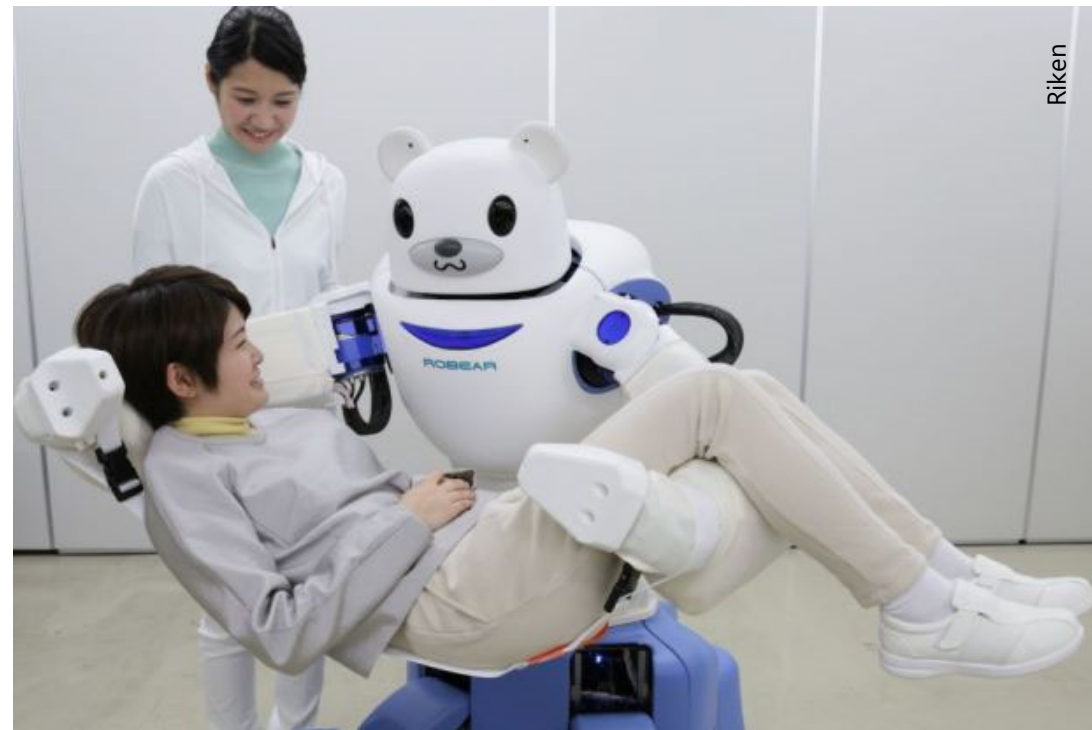

Der Serviceroboter „RoBear“ von Riken war stark genug, um einen Patienten zu tragen – er hatte aber keinerlei Fähigkeiten zur Emotionserkennung.

# Gibt es mehr Industrieroboter oder mehr Service-Roboter?

Technavio.com

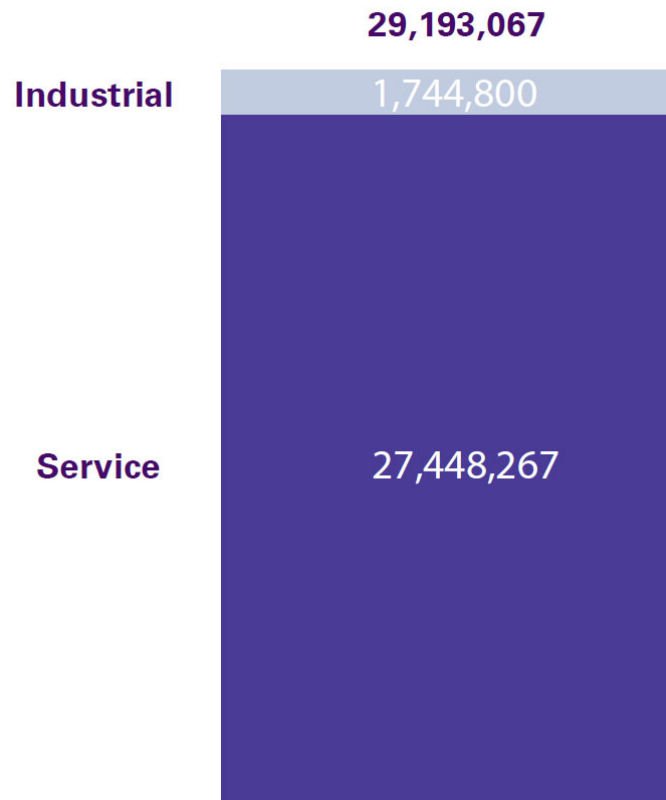

2016 KPMG Advisory N.V.

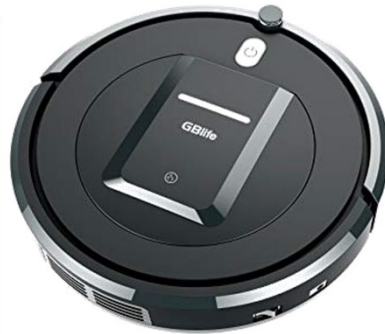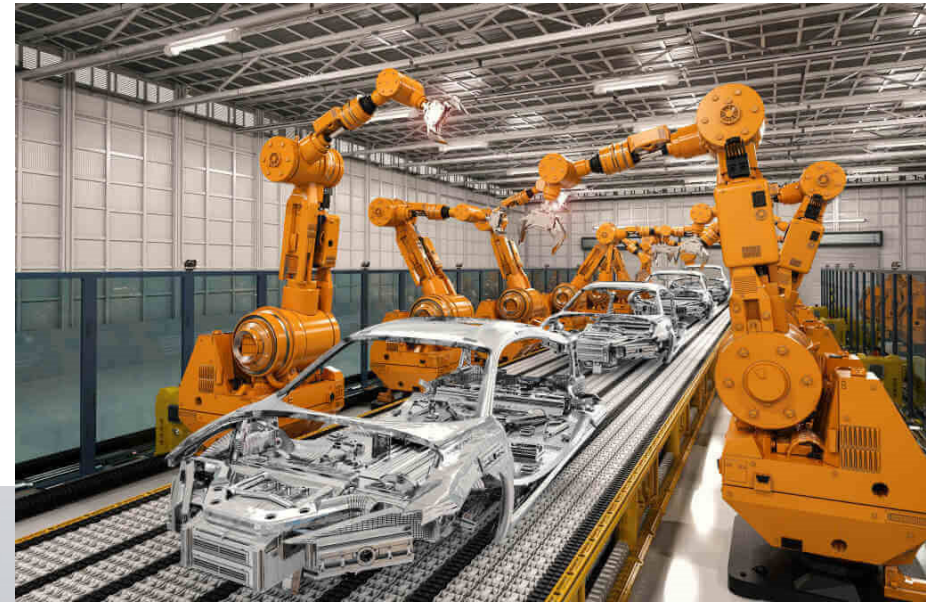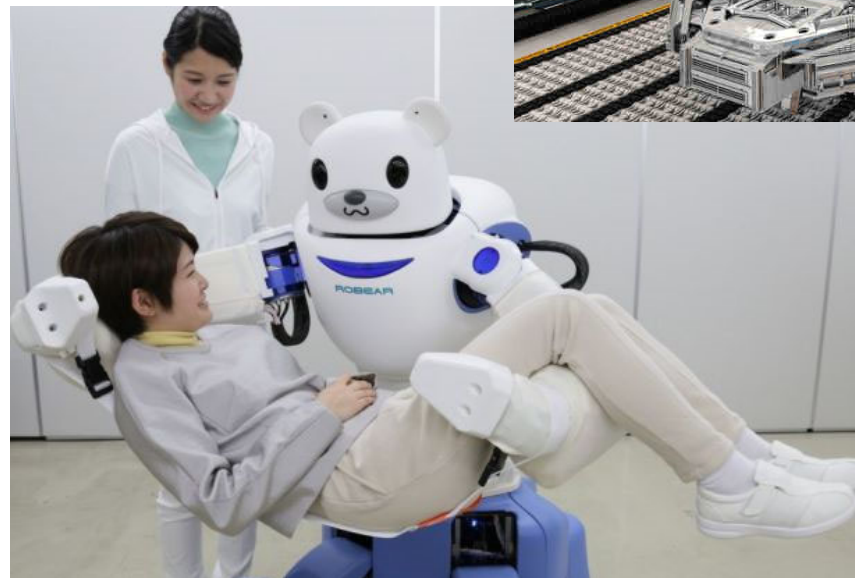

Riken



# Wieviel Prozent der persönlichen Service-Roboter sind „sozial“?

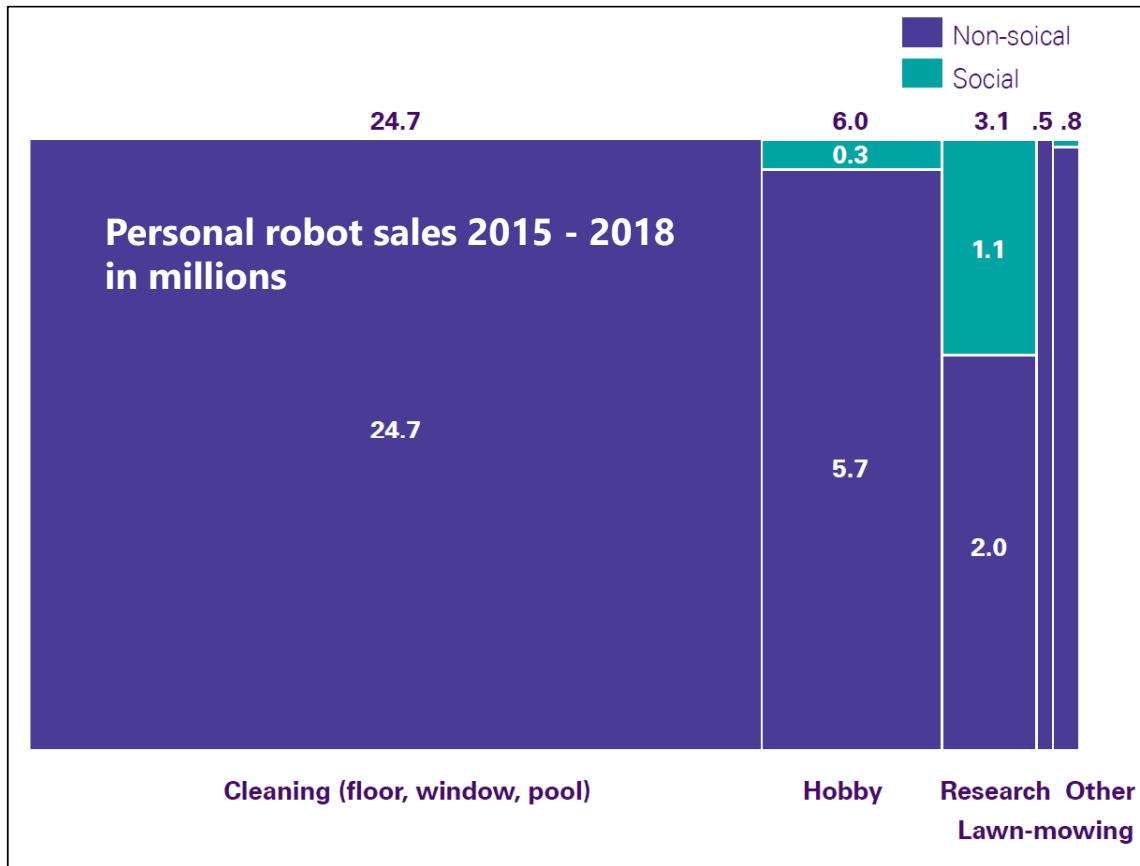

1,4 Mio. von 35,1 Mio.  
= ca. 4%

2016 KPMG Advisory N.V.

# Auswahl aktuell verfügbarer „sozialer“ Roboter

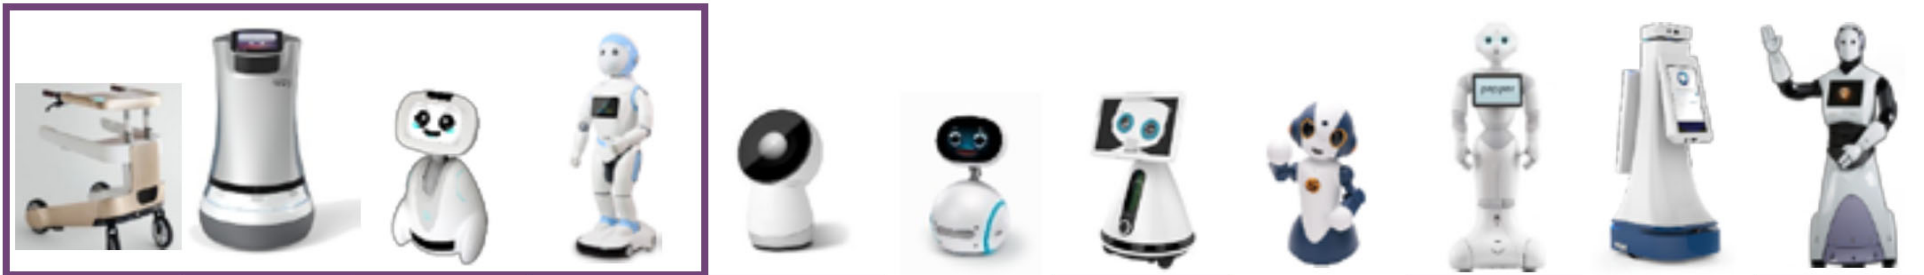

| Name                 | LEA                                                                                                          | Relay                                                   | Buddy                                                                                                            | iPal                                                                           | Jibo                                                                                                              | Zenbo                       | Furo-i                                                                                          | Sota                      | Pepper                                                                                     | Oshbot                                                                                                                  | REEM                                                                 |
|----------------------|--------------------------------------------------------------------------------------------------------------|---------------------------------------------------------|------------------------------------------------------------------------------------------------------------------|--------------------------------------------------------------------------------|-------------------------------------------------------------------------------------------------------------------|-----------------------------|-------------------------------------------------------------------------------------------------|---------------------------|--------------------------------------------------------------------------------------------|-------------------------------------------------------------------------------------------------------------------------|----------------------------------------------------------------------|
| <b>Purpose</b>       | LEA helps people to lead an active life, helps with daily routines, ensures safety and ease of communication | A robot that relays products from one person to another | A companion robot that protects the home, offers assistance, entertains and interfaces with smart home solutions | A friendly companion for children to play with and talk to in a natural manner | Helps adults to manage their life, helps seniors to live with greater independence and is a playmate for children | Your smart little companion | Create closer family relationships. A connection to home devices and a companion for the family | A "social dialogue" robot | Pepper is the first emotional robot. He was designed to be a true companion for daily life | Your autonomous retail robot assistant. Empowering your retail workforce with Inventory Management and Customer Service | A friendly full-size humanoid robot that will make your event unique |
| <b>Target market</b> | Elderly Care                                                                                                 | Hospitality industry                                    | Families                                                                                                         | Children aged 3-8 years                                                        | Families                                                                                                          | Families                    | Families                                                                                        | Elderly care              | Both homes and businesses                                                                  | Retail                                                                                                                  | Entertainment at events, conferences and fairs                       |
| <b>Company</b>       | Robot Care Systems                                                                                           | Savioke                                                 | Blue Frog Robotics                                                                                               | AvatarMind                                                                     | Jibo                                                                                                              | Asus                        | Future Robot                                                                                    | Vstone                    | Aldebaran                                                                                  | Fellow Robots                                                                                                           | PAL Robotics                                                         |
| <b>Headquarters</b>  | The Netherlands                                                                                              | USA                                                     | France                                                                                                           | USA                                                                            | USA                                                                                                               | Taiwan                      | Korea                                                                                           | Japan                     | France                                                                                     | USA                                                                                                                     | Spain                                                                |
| <b>Website</b>       | robotcaresystems.com                                                                                         | savioke.com                                             | bluefrogrobotics.com                                                                                             | avatarMind.com                                                                 | Jibo.com                                                                                                          | zenbo.asus.com              | myfuro.com                                                                                      | vstone.co.jp              | aldebaran.com                                                                              | fellowrobots.com                                                                                                        | pal-robotics.com                                                     |

# Aber: Was wäre, wenn Alexa sich bewegen könnte?

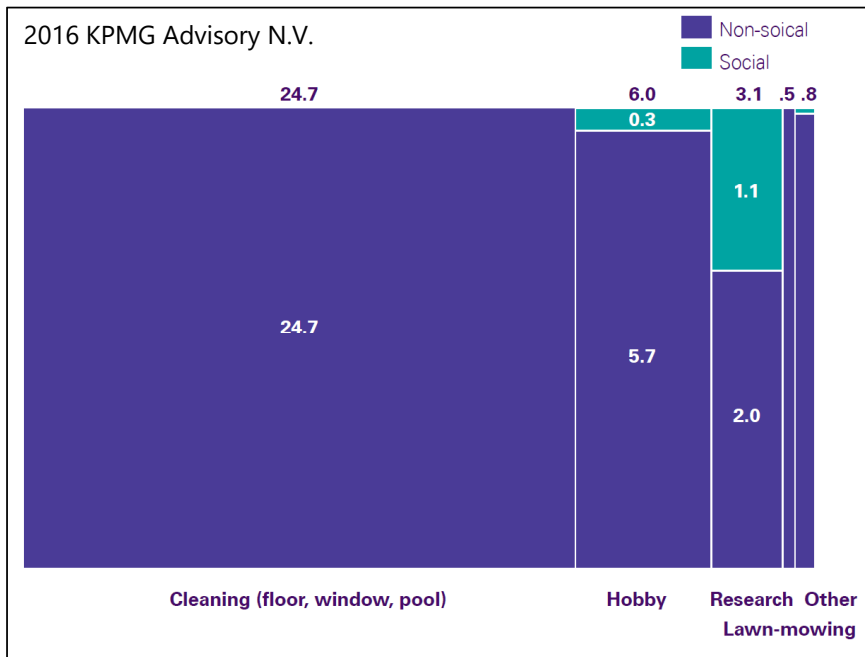

1,4 Mio. „sozial“  
von 35,1 Mio.  
= ca. 4%

220 Mio. „intelligente“  
Assistenzgeräte 2020.

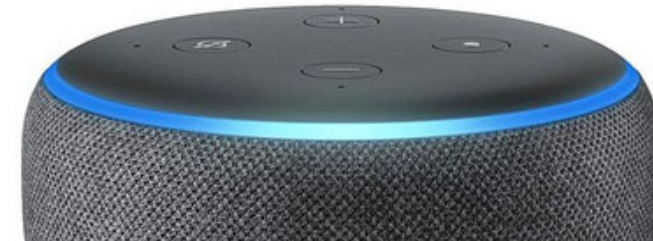

## Smart speaker installed base to reach 100m in 2018

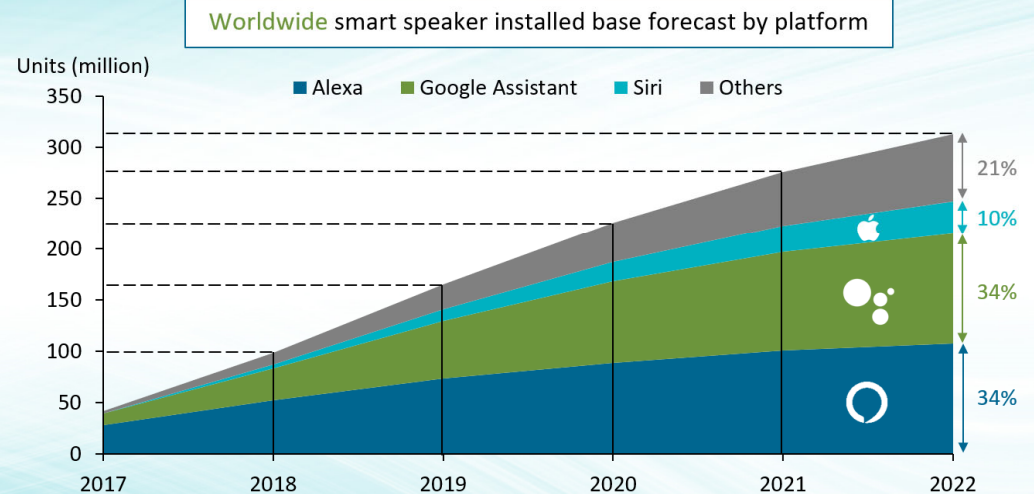

# Soziale Roboter: Wie lernen Maschinen, Emotionen zu deuten?

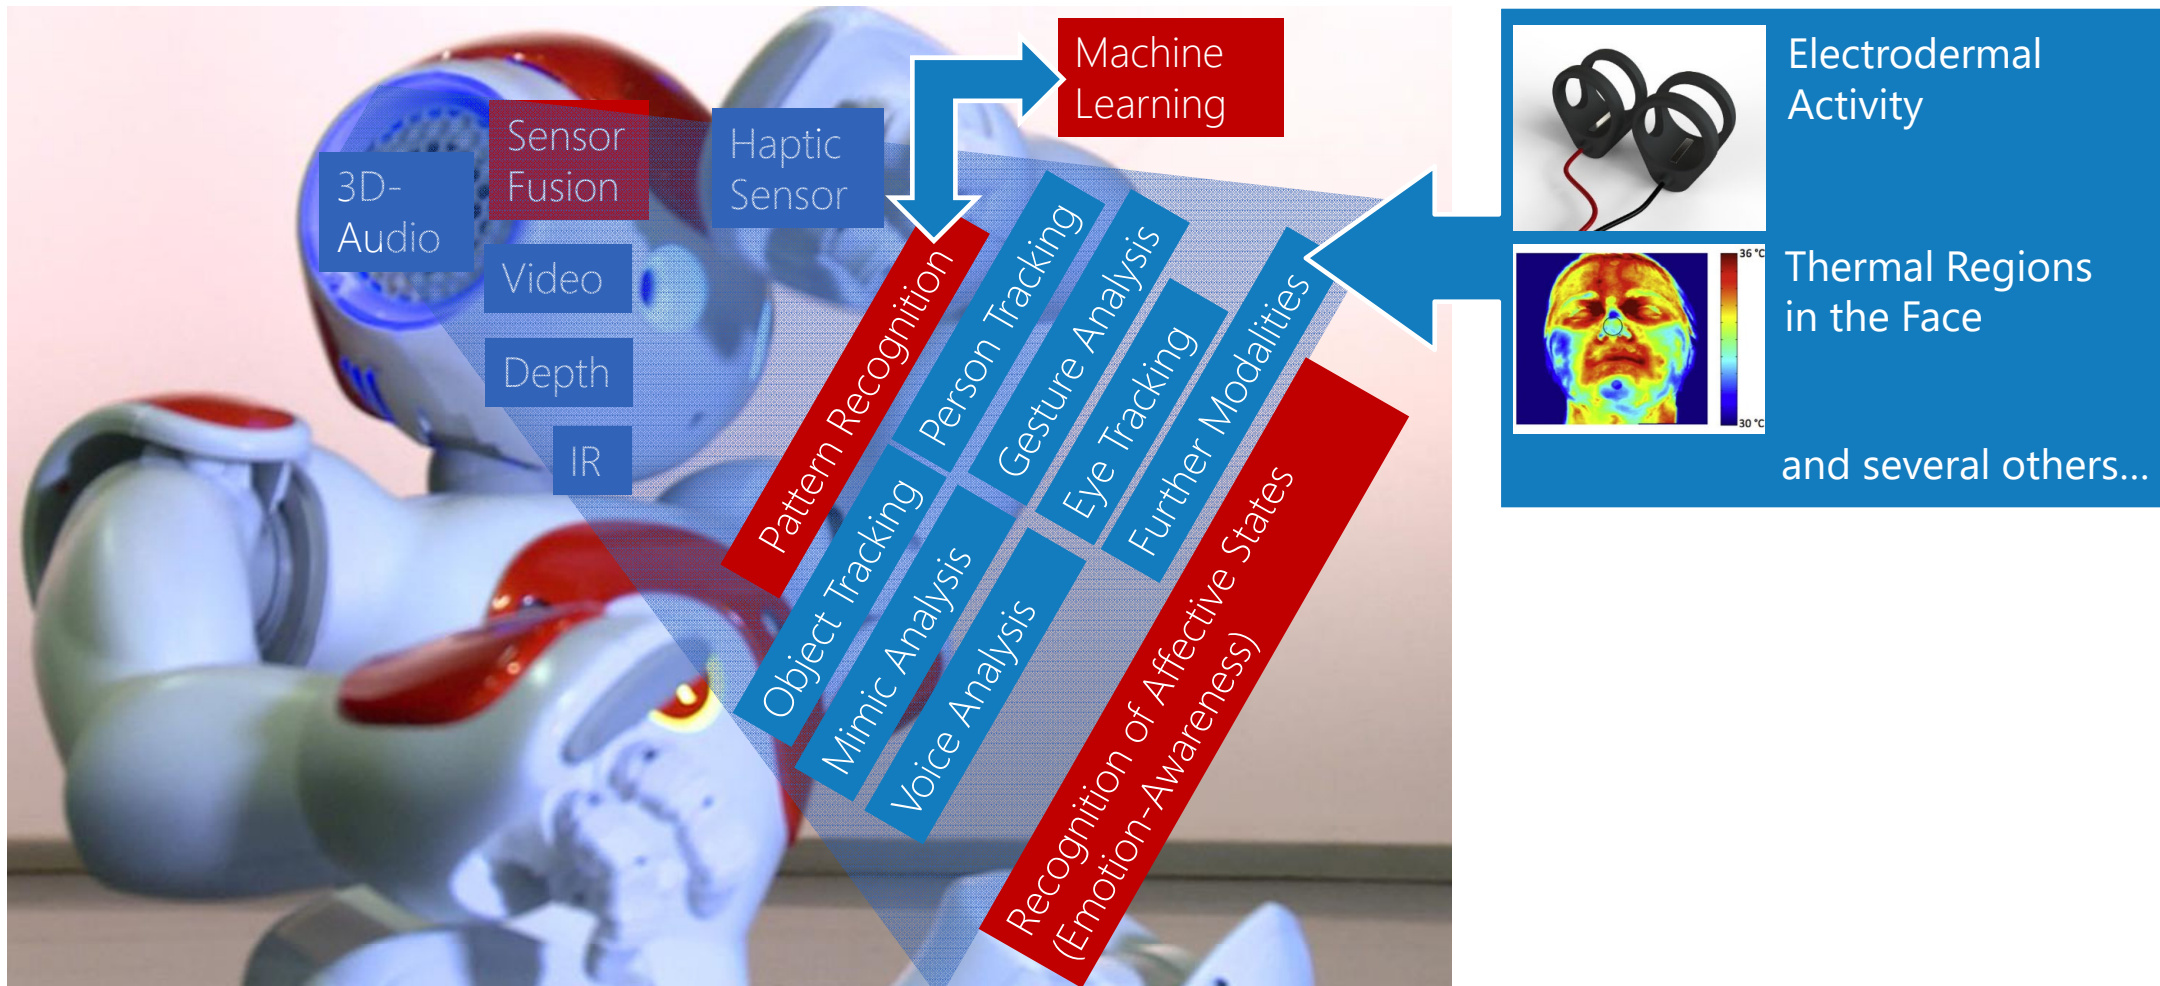

# Emotionserkennung: Beispiel Facial Tracking und Eye-Tracking

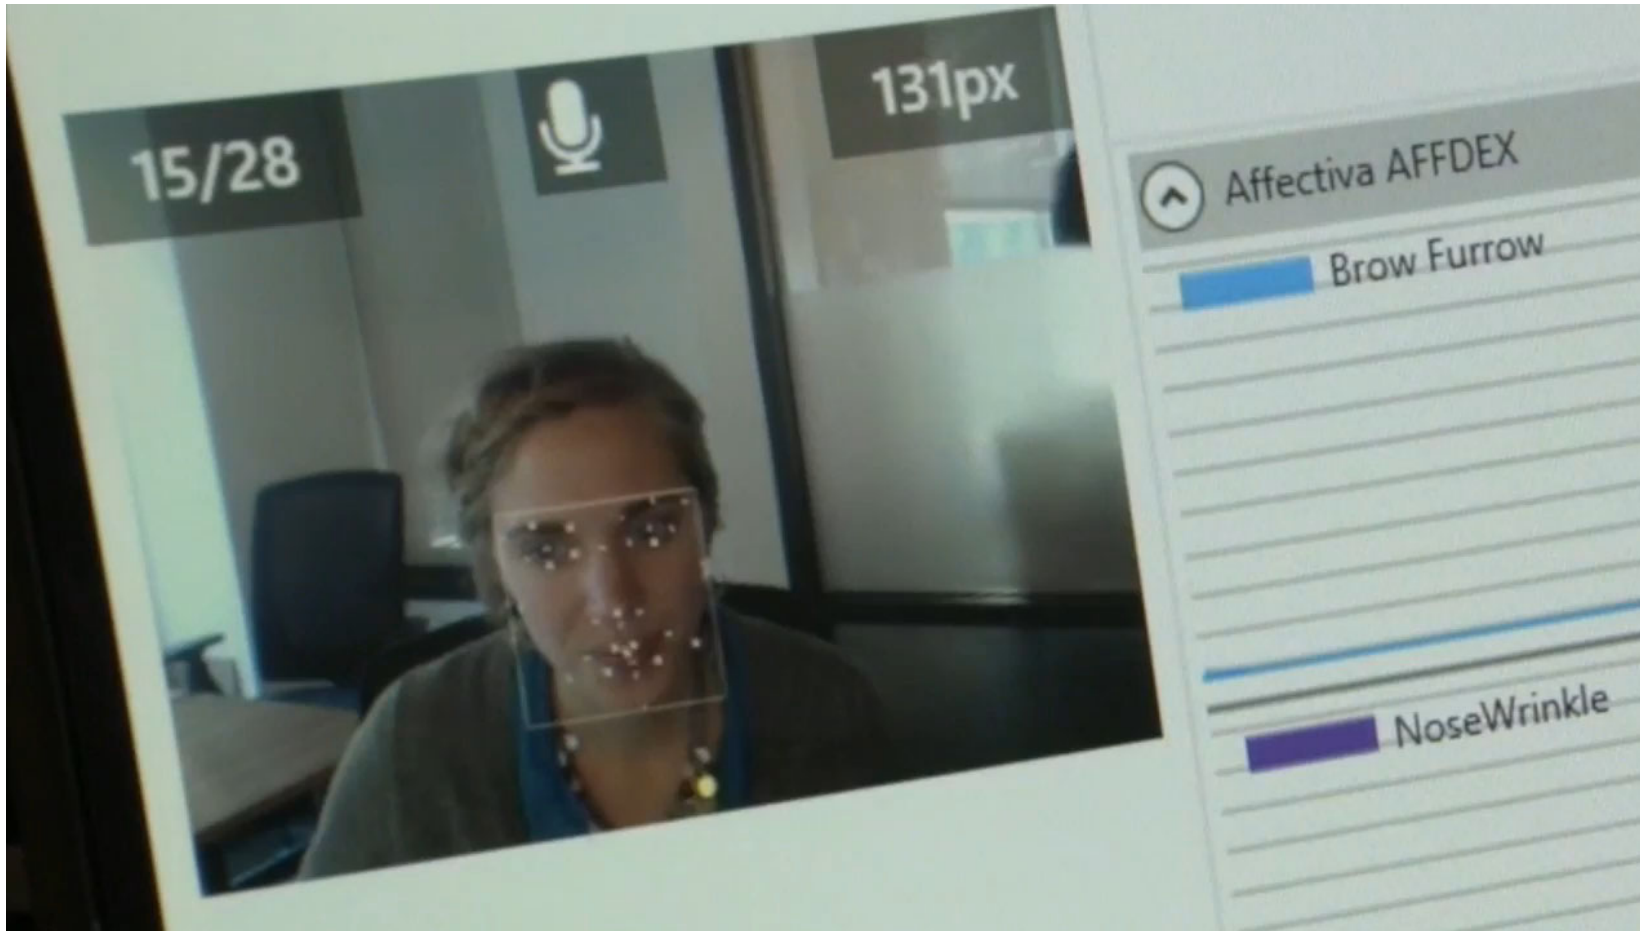

<https://www.youtube.com/watch?v=136aVnTwpKU>

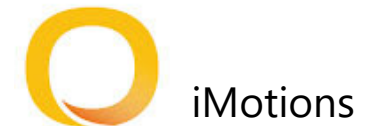

# Zusammenarbeit zwischen Entwicklern, Psychologen und Nutzern

- **Entwickler:**  
Lieben die Technik – aber kennen die **Restriktionen**, z. B. die niedrige Auflösung vieler robotischer Kameras.
- **Psychologen und Kognitionswissenschaftler:**  
Kennen die **neuronalen Grundlagen**. Haben oft Probleme damit, dass Systeme auf Basis von Machine Learning zwar korrekte Interpretationen liefern, aber diese nicht „erklären“ können, da sie **kein grundlegendes Verständnis** besitzen.
- **Nutzer:**  
Sind erstaunlich **gerne bereit**, an Experimenten teilzunehmen – und schreiben Systemen häufig **mehr kognitive und emotionale Fähigkeiten** zu, als diese derzeit besitzen.

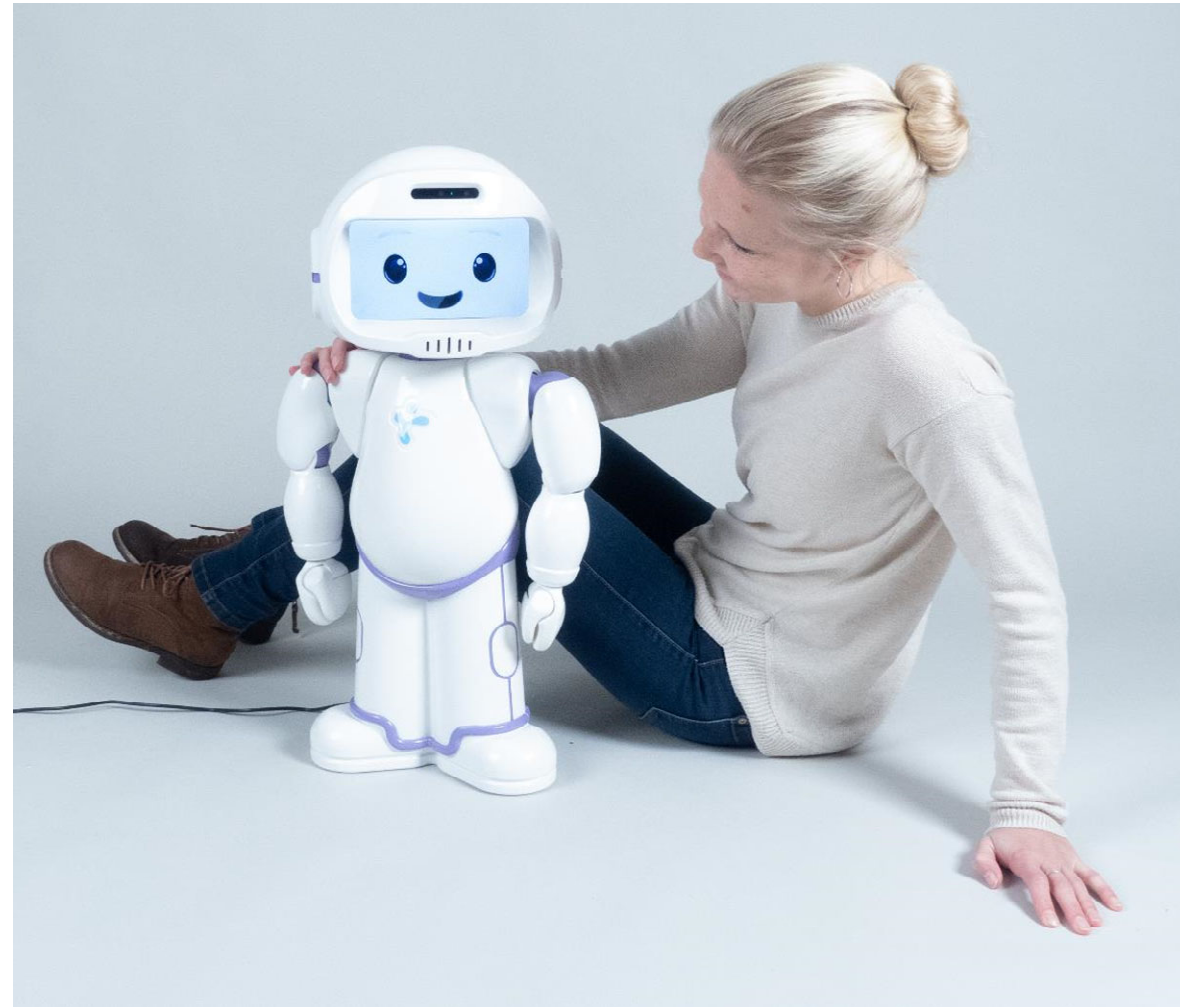

# Beispiel: Studie zu Telepräsenz-Robotern in der Lehre

- **Anwender:**  
Studierende an der Hochschule Offenburg.
- **Ablauf:**  
Lehre wird einmal klassisch, einmal mit „Padbot“ und einmal mit einem „sozialem Roboter“ (hier: Sanbot) durchgeführt. Hierbei werden die Roboter direkt durch den Dozenten aus der Distanz gesteuert, sie sind NICHT autonom.
- **Ergebnis:**  
Technische Hürden trüben die Lehrerfahrung: Größe des Displays für Interaktionen, Stabilität der Datenverbindung (im Hochschulnetz!), langsame Fahrgeschwindigkeit.
- **Fazit:**  
Derzeitige Systeme eignen sich höchstens für die Interaktion mit kleinen Gruppen (2 bis maximal 5 Personen). Der soziale Roboter genießt anfangs einen Sympathie-Bonus (Novelty-Effekt).

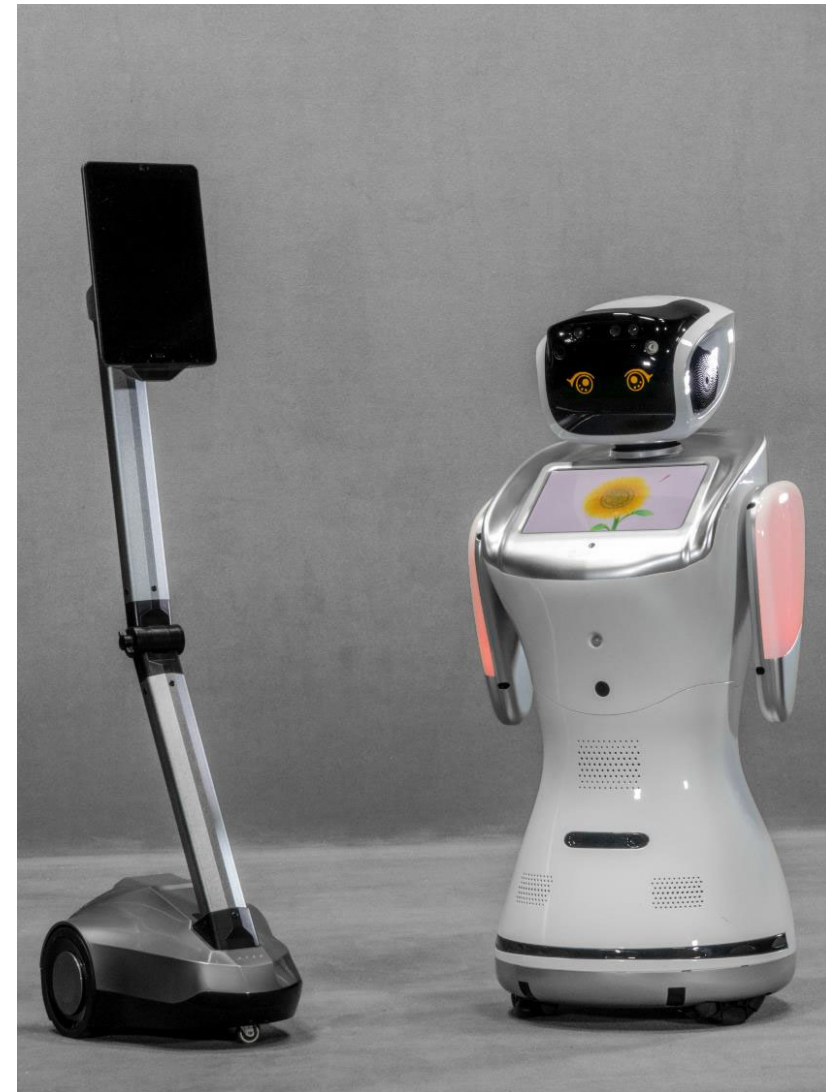

# Soziale Roboter: Mögliche Weiterentwicklung

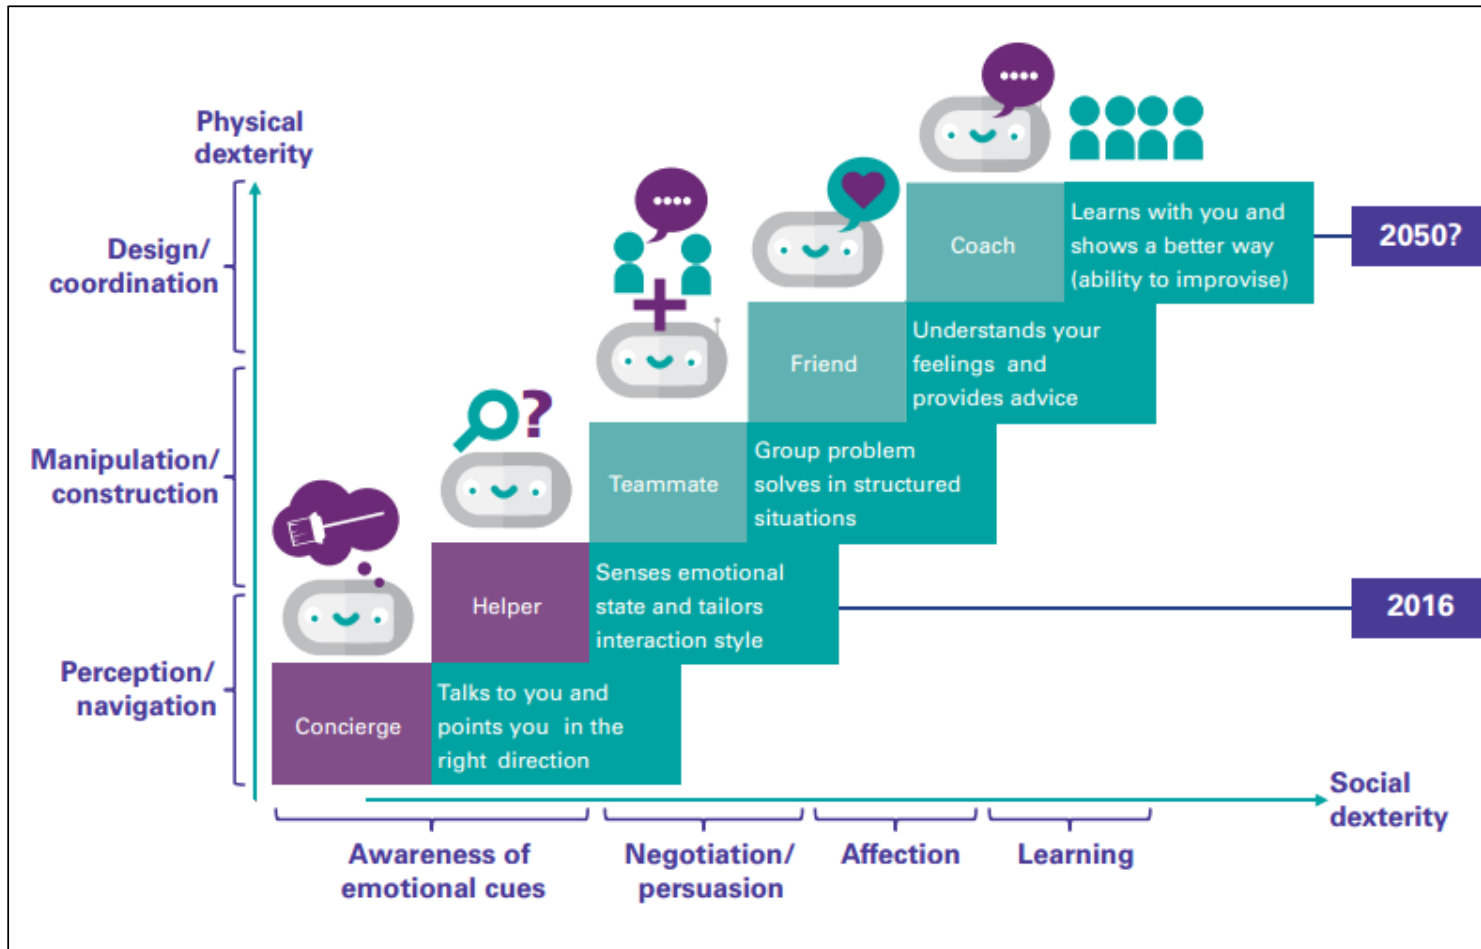

2016 KPMG Advisory N.V.



# Nächste Schritte? Ein Buch und ein Wissenschafts-Comic

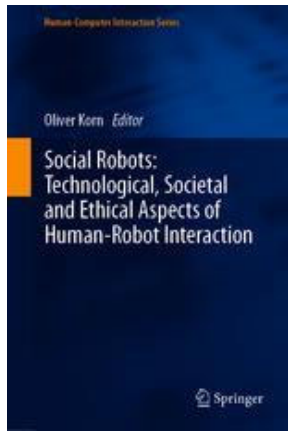

Korn, Oliver (Ed.) (2019): *Social Robots: Technological, Societal and Ethical Aspects of Human-Robot Interaction*.

Springer Berlin Heidelberg, ISBN 978-3-030-17106-3; 978-3-030-17107-0 (online).

<https://doi.org/10.1007/978-3-030-17107-0>

- Wissenschafts-Comic zu sozialen Robotern – mit vielen Hintergrundinformationen und Debatten zur ethischen Dimension.
- Plot: Ein sozialer Roboter wird gestohlen, und die junge Inspektorin Kira muss viel über diese Roboter lernen, um ihn zu finden.

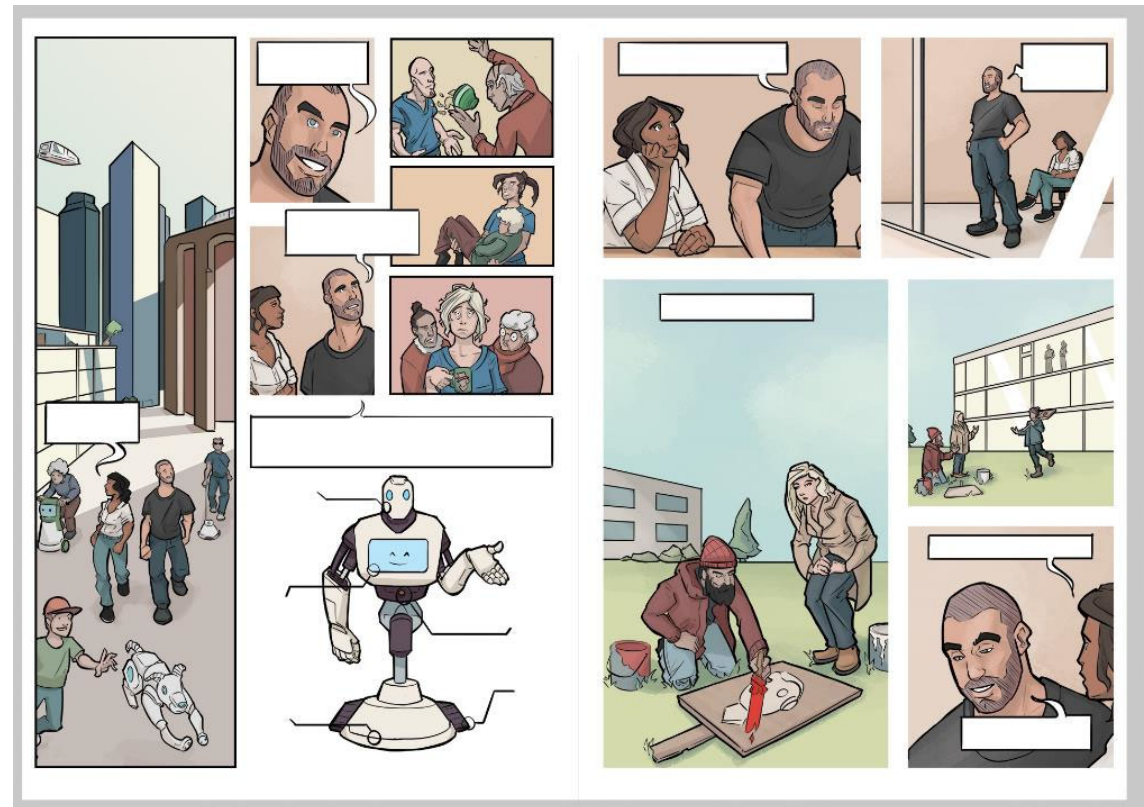

# Einschätzung zur Zukunft sozialer Roboter

- Soziale Roboter sind **Publikumsmagnete**. Diese Eigenschaft machen sich auch **Scharlatane** zu Nutze, z. B. in der irreführenden medialen Darstellung des Roboters Sophia.
- Bei aktuell verfügbaren sozialen Robotern sind die **hardware-basierten Fähigkeiten noch sehr begrenzt**: Sie sind weder schnell noch agil und daher von überschaubarem praktischem Nutzen.
- Die Akzeptanz von **Assistenzsystemen** wie Alexa und zugleich **Staubsaugrobotern** zeigt aber, dass ein **großer Markt** für unterstützende Systeme existiert – und zudem viele Konsumenten nach wie vor bereit sind, Datenschutz hinten anzustellen.
- Die **technische Entwicklung von Emotionserkennung ist weit fortgeschritten** und ermöglicht grundsätzlich schon heute die Herstellung emotionssensitiver sozialer Roboter.
- Für die weitere Verbreitung **fehlt derzeit ein robustes System**, das zum Preis etwa eines Mittelklassewagens **einfache Hilfsfunktionen** wie Holen und Bringen übernehmen könnte.

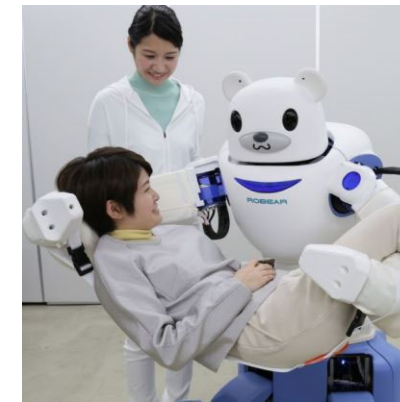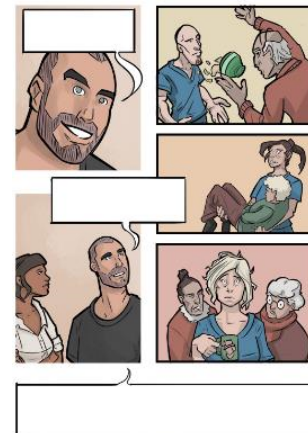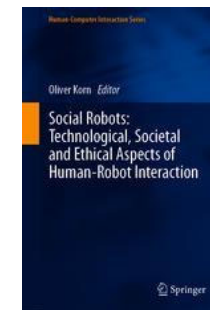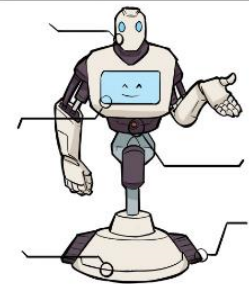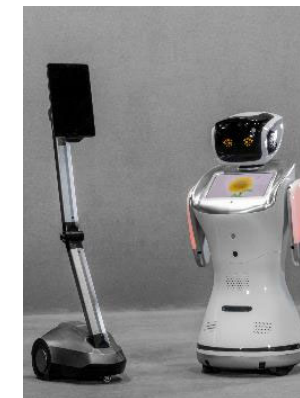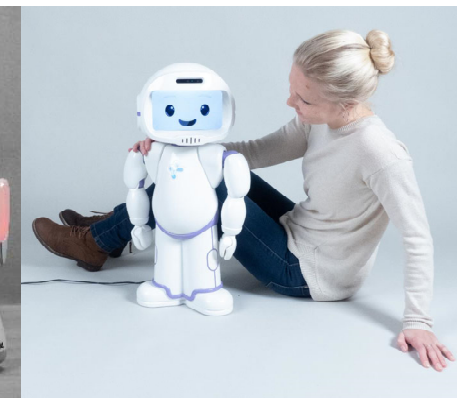

Danke!

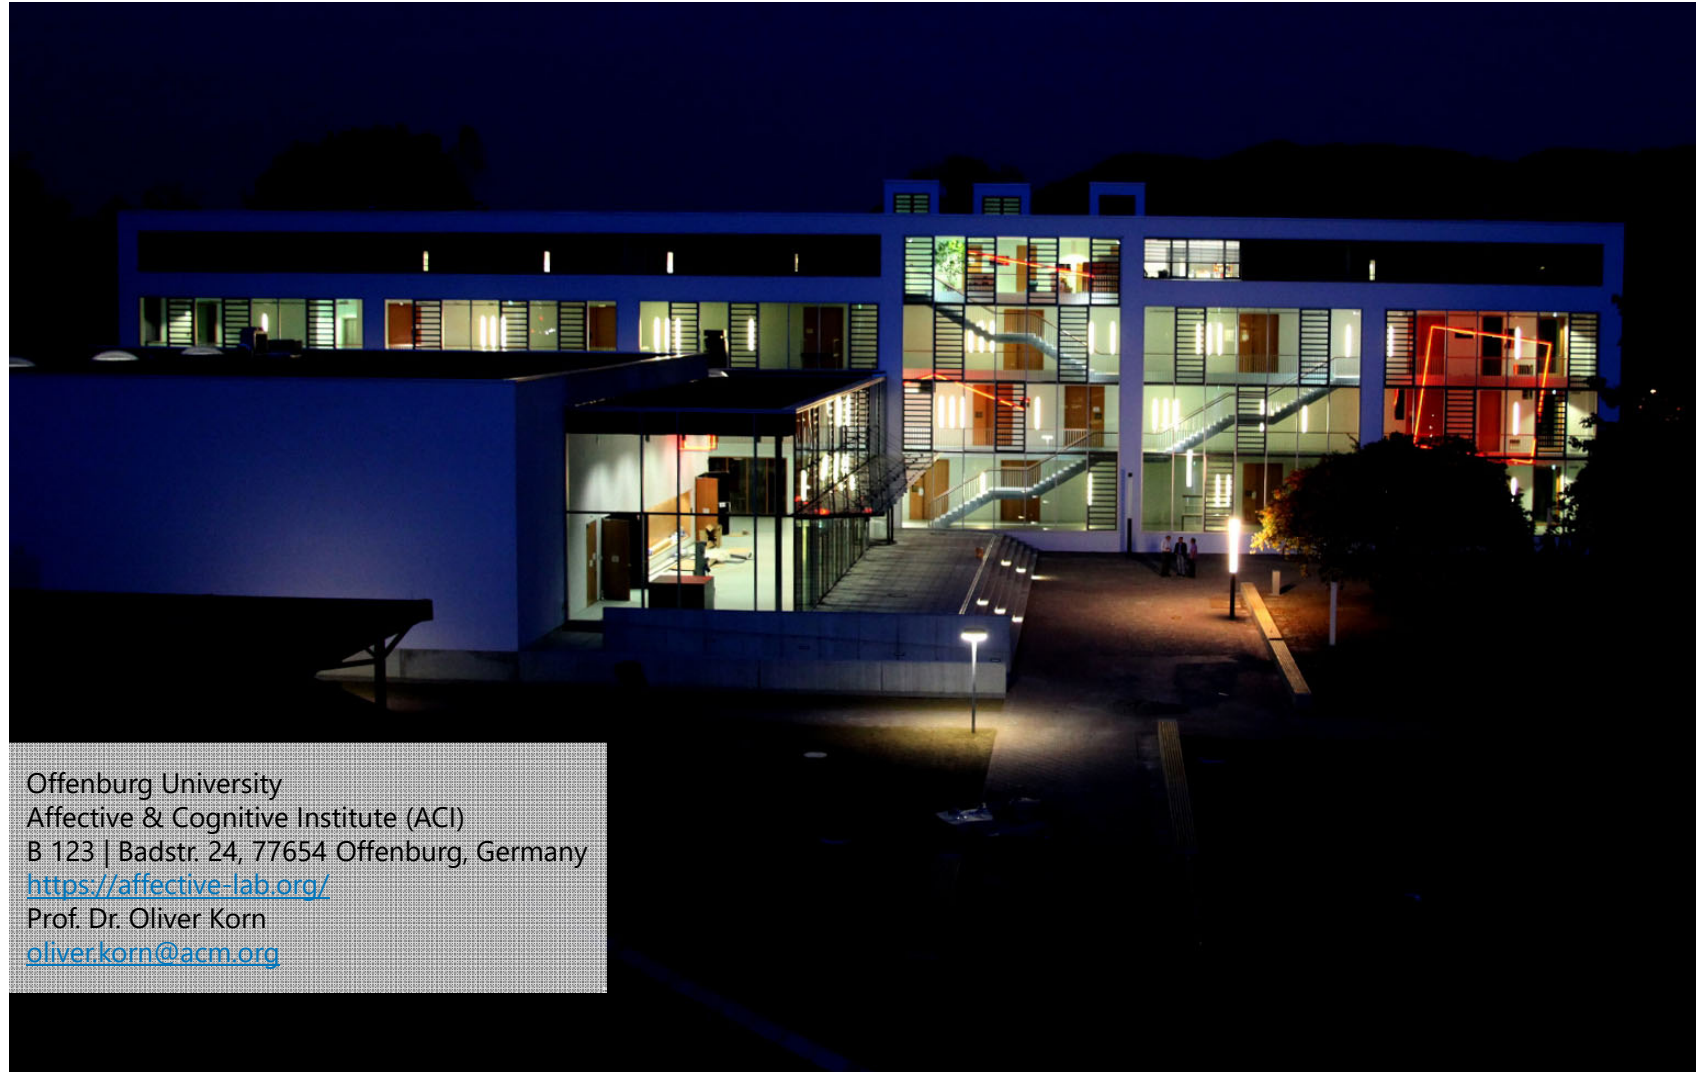

Offenburg University  
Affective & Cognitive Institute (ACI)  
B 123 | Badstr. 24, 77654 Offenburg, Germany  
<https://affective-lab.org/>  
Prof. Dr. Oliver Korn  
[oliver.korn@acm.org](mailto:oliver.korn@acm.org)

# Was macht Roboter sozial?

Prof. Dr. Oliver Bendel

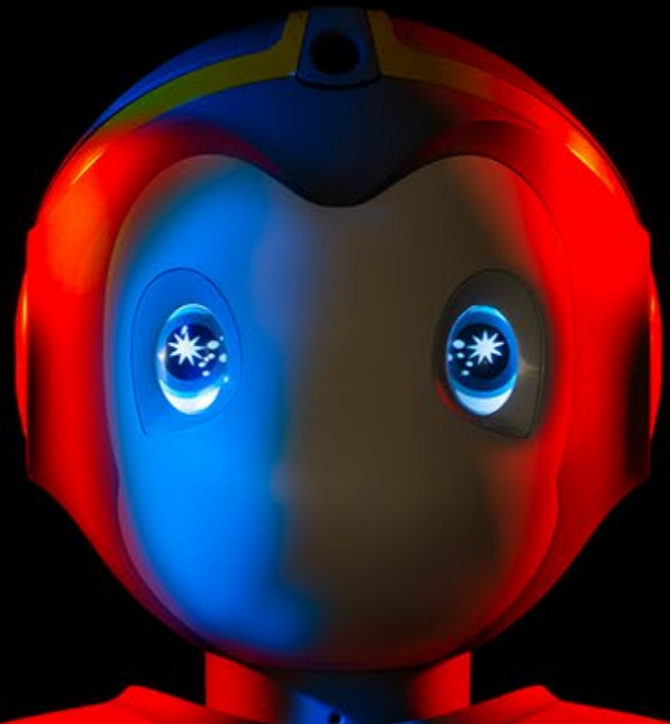

## Zur Person

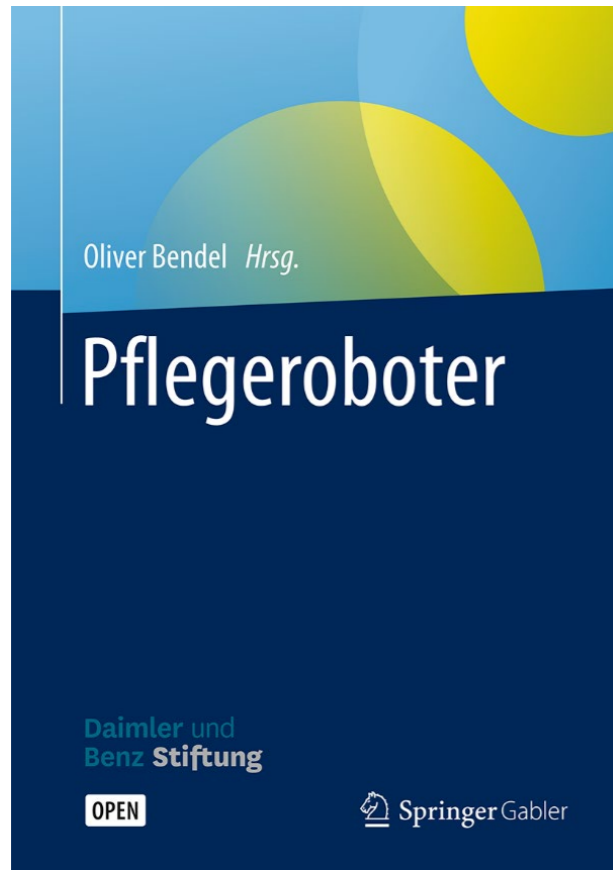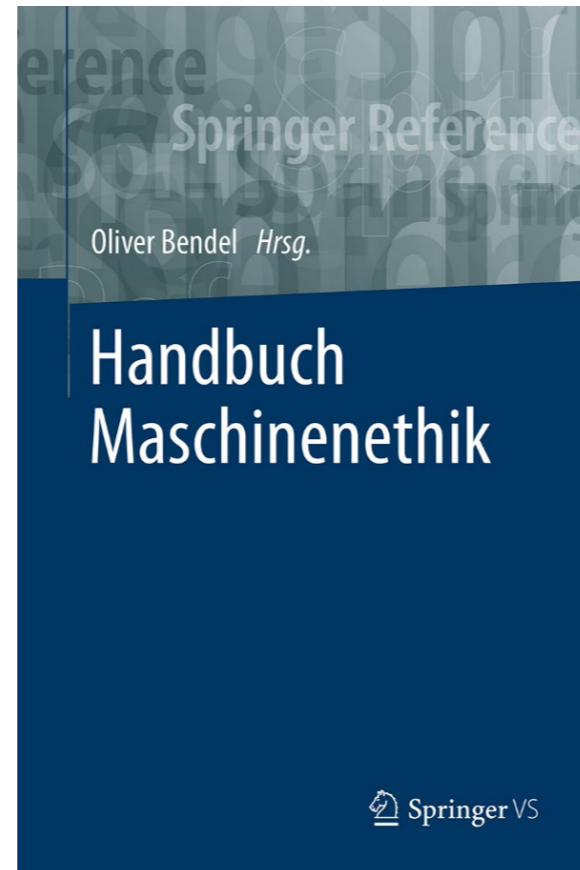

- Seit 2009 Professor für Wirtschaftsinformatik und Ethik
- Seit den 1990er-Jahren Beschäftigung mit Informations- und Maschinenethik
- Aktuelle Bücher: «Pflegeroboter» (2018), «Handbuch Maschinenethik» (2019), «Maschinenliebe» (Ende 2020)
- Aktuelles Projekt: «Roboter, Empathie und Emotionen» (mit H. Schulze und M. Schubert, für TA-SWISS, 2019 – 2020)

## Soziale Roboter

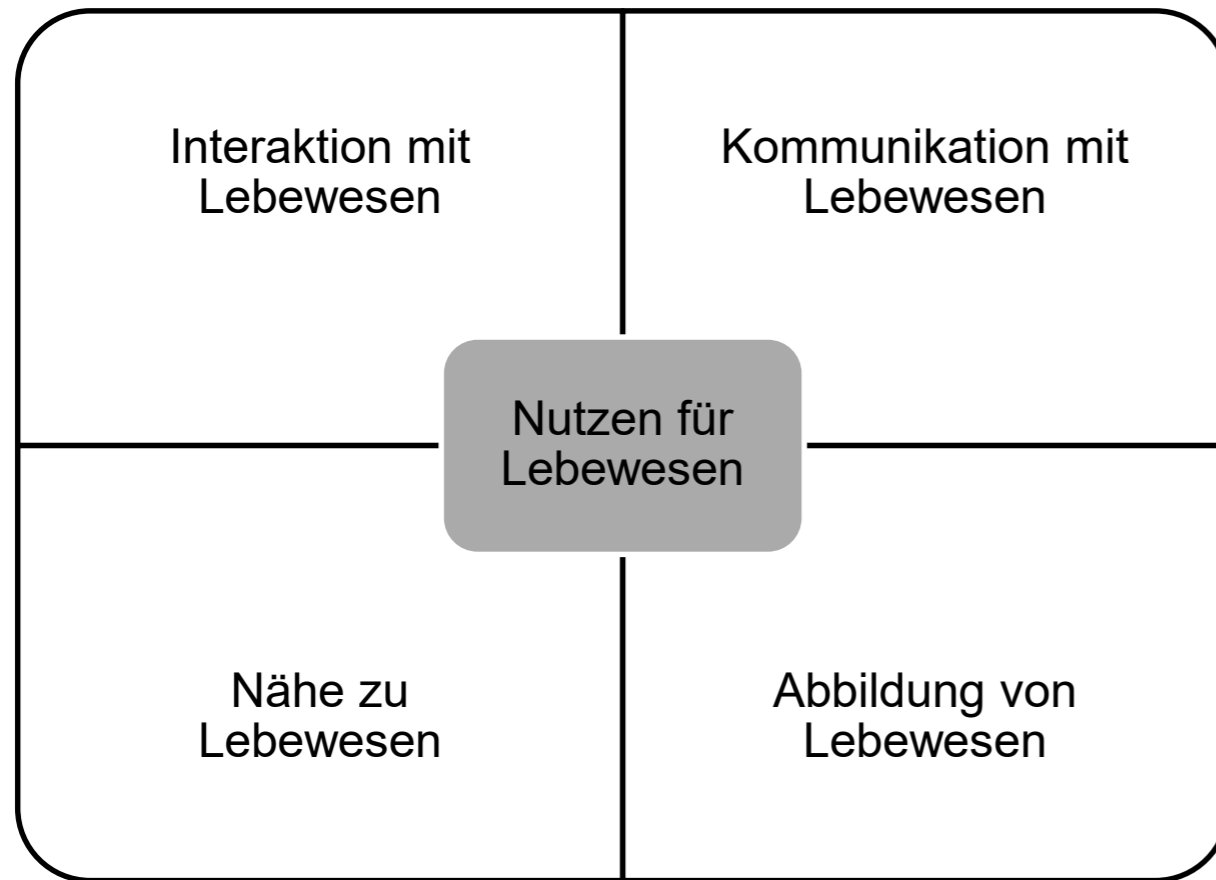

- Hardwareroboter (etwa Service- oder Spielzeugroboter) oder – bei einem weiten Begriff – Softwareroboter (etwa Chatbots, Voicebots, Social Bots)
- Manchmal dinghaft, oft tierähnlich (animaloid) oder menschenähnlich (humanoid) gestaltet
- Sozial im Sinne des Zusammenseins mit Menschen und Tieren oder der Unterstützung von Menschen und Tieren

## Spielzeugroboter: Cozmo von Anki

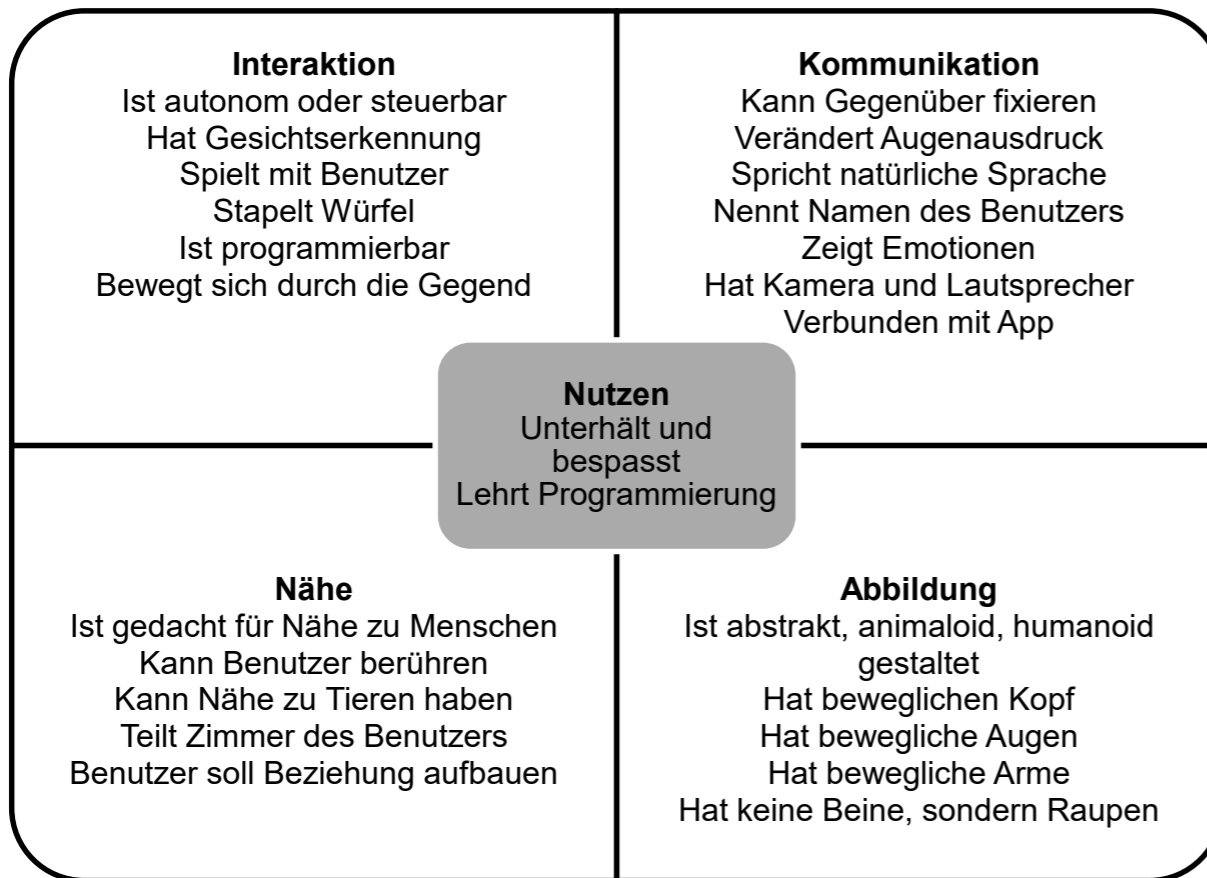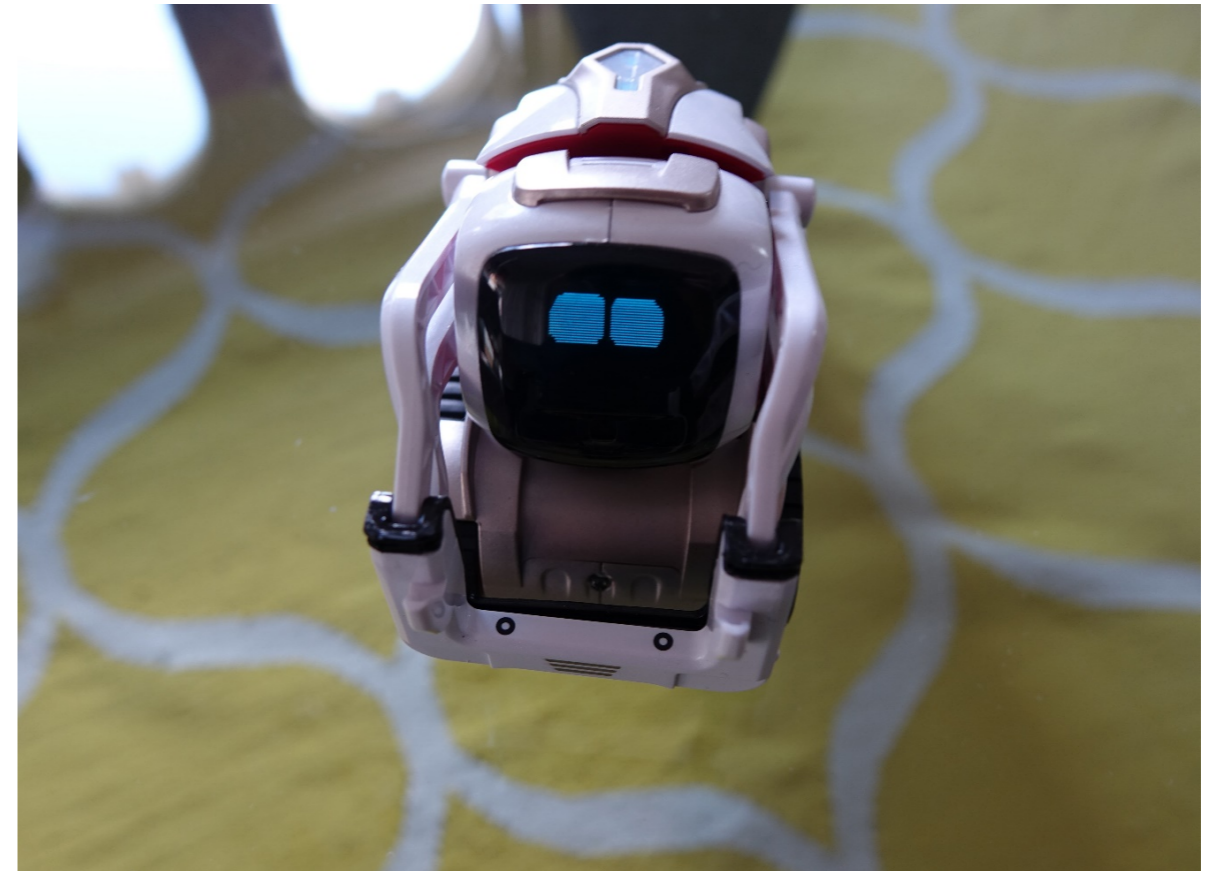

## Sexroboter: Harmony von Realbotix

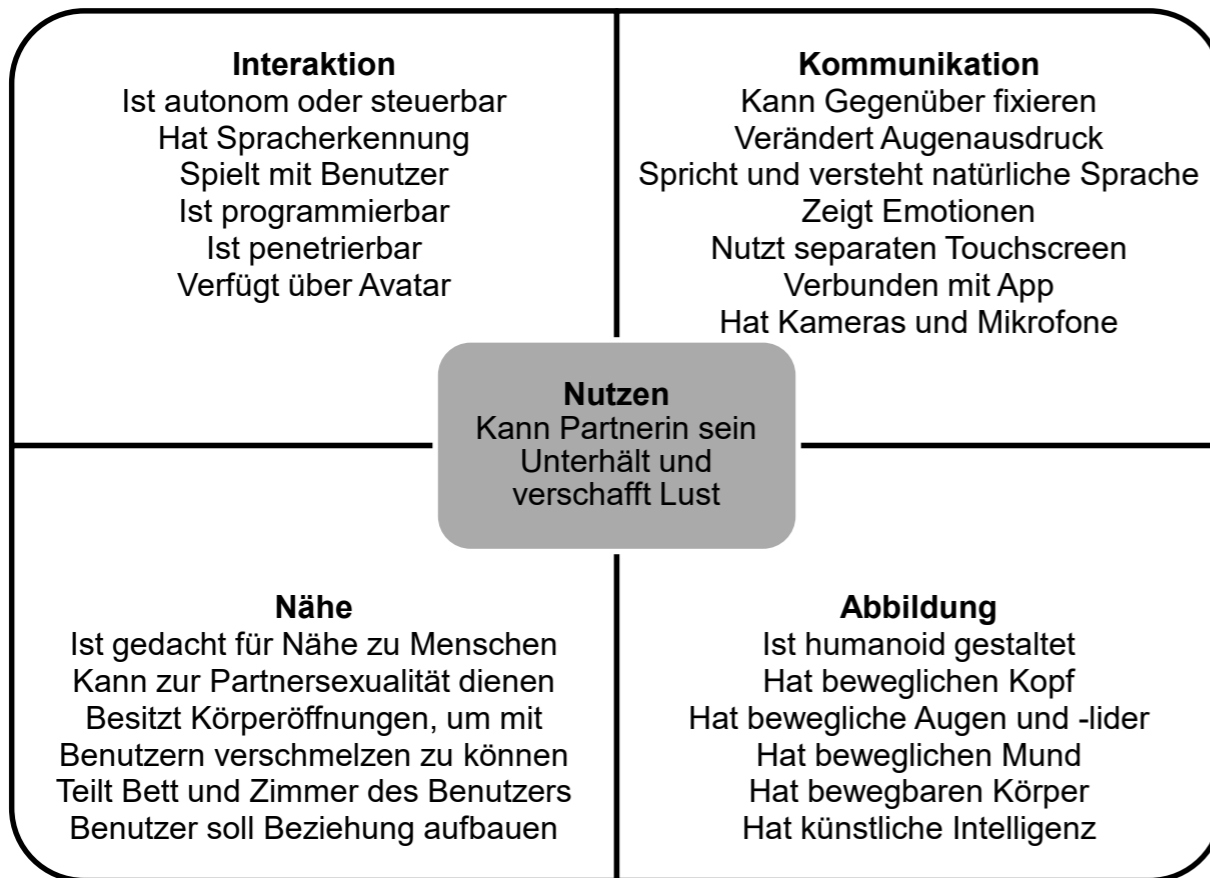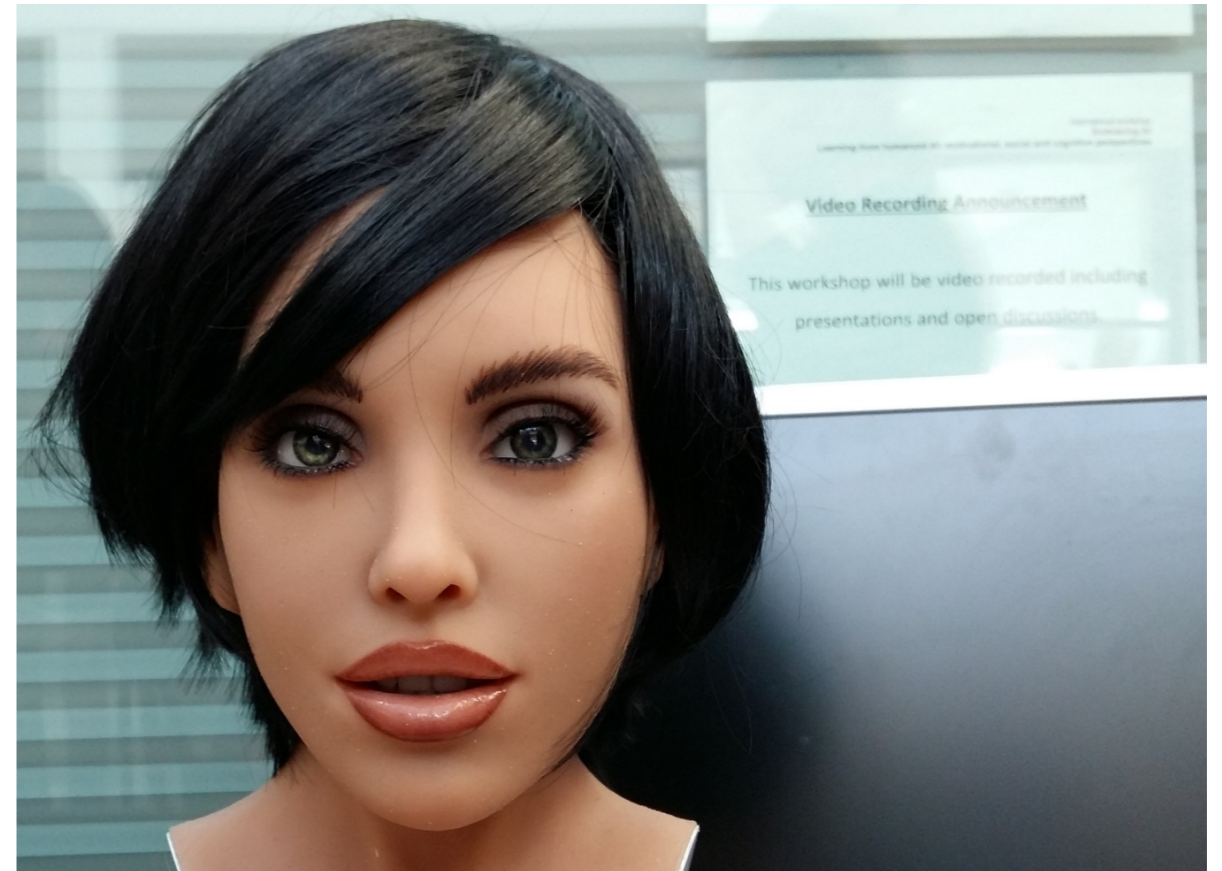



## Pflegroboter: P-Care von F&P Robotics/ZRFN Robotics

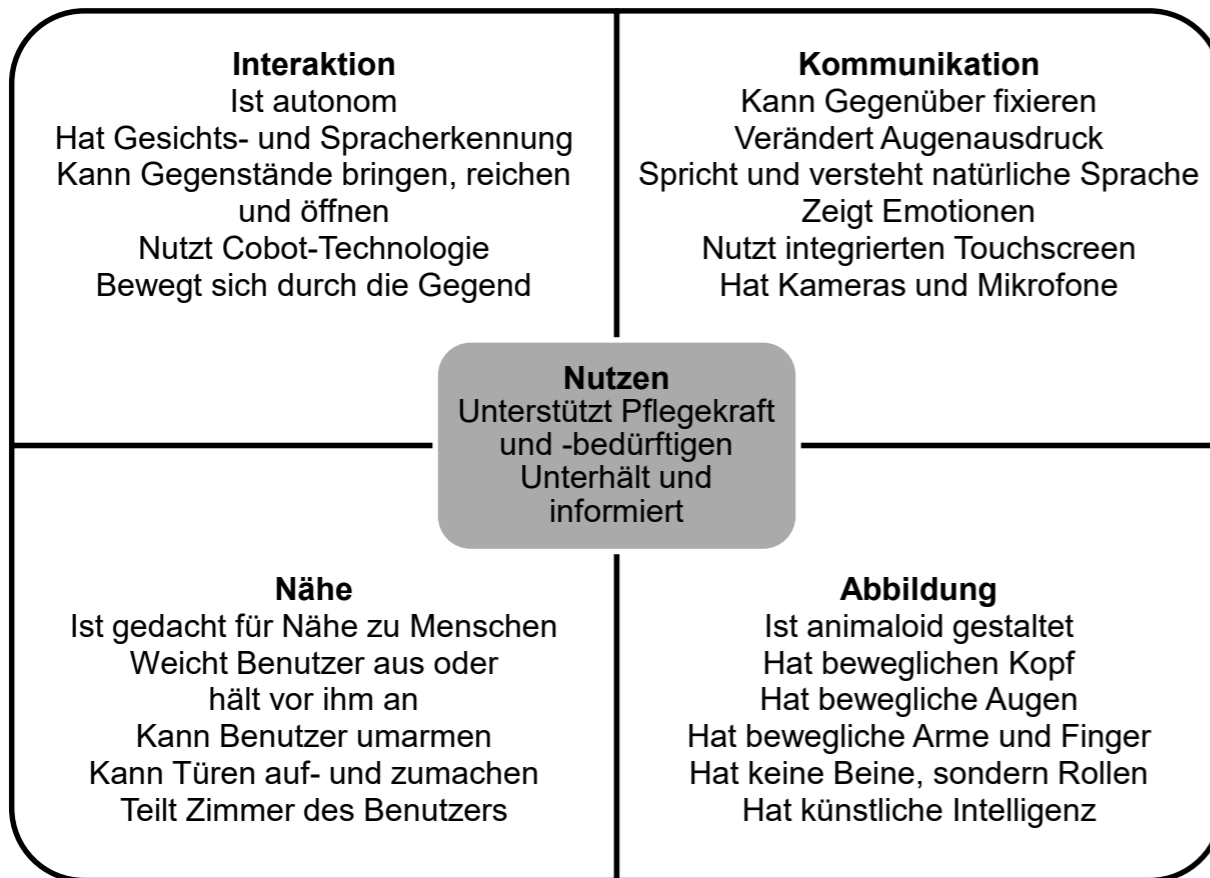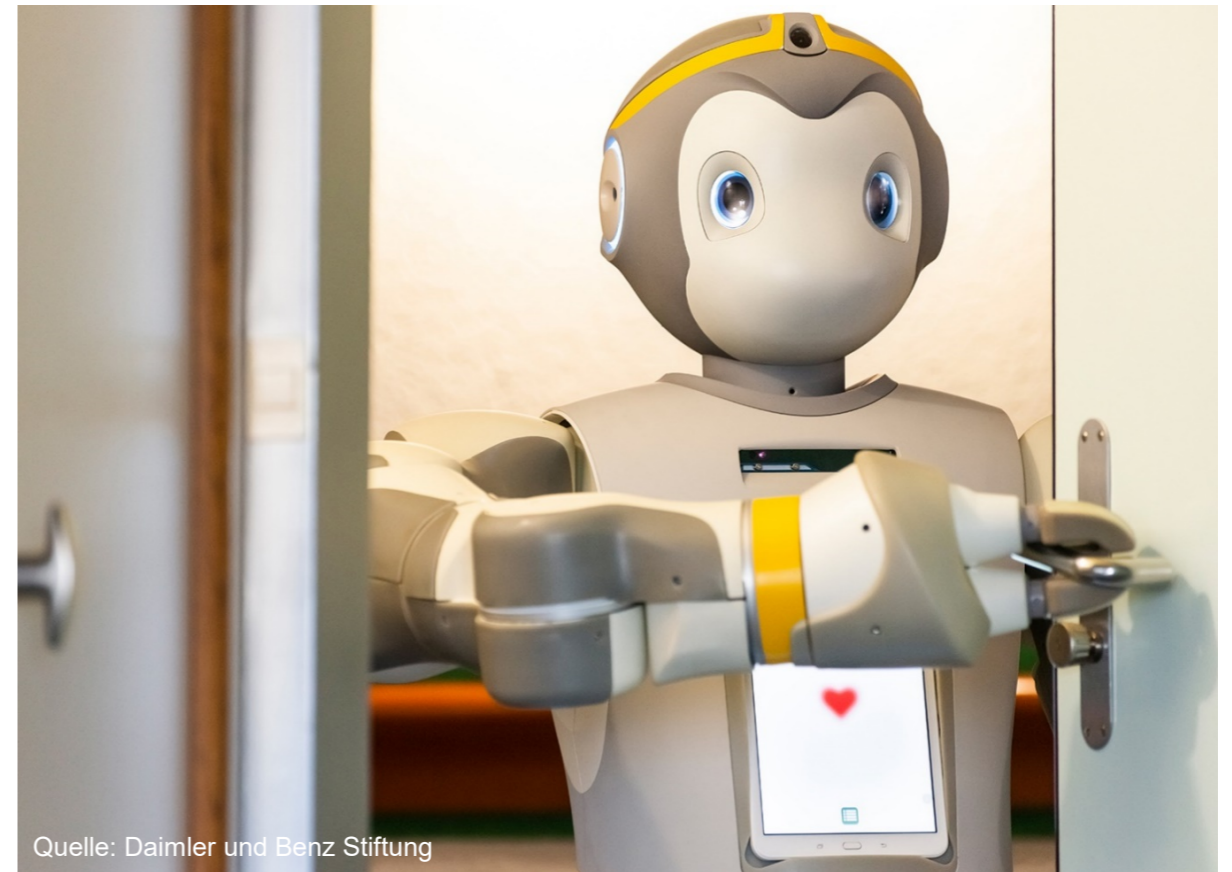

## Sicherheits- und Überwachungsroboter: Robocop/REEM von PAL Robotics

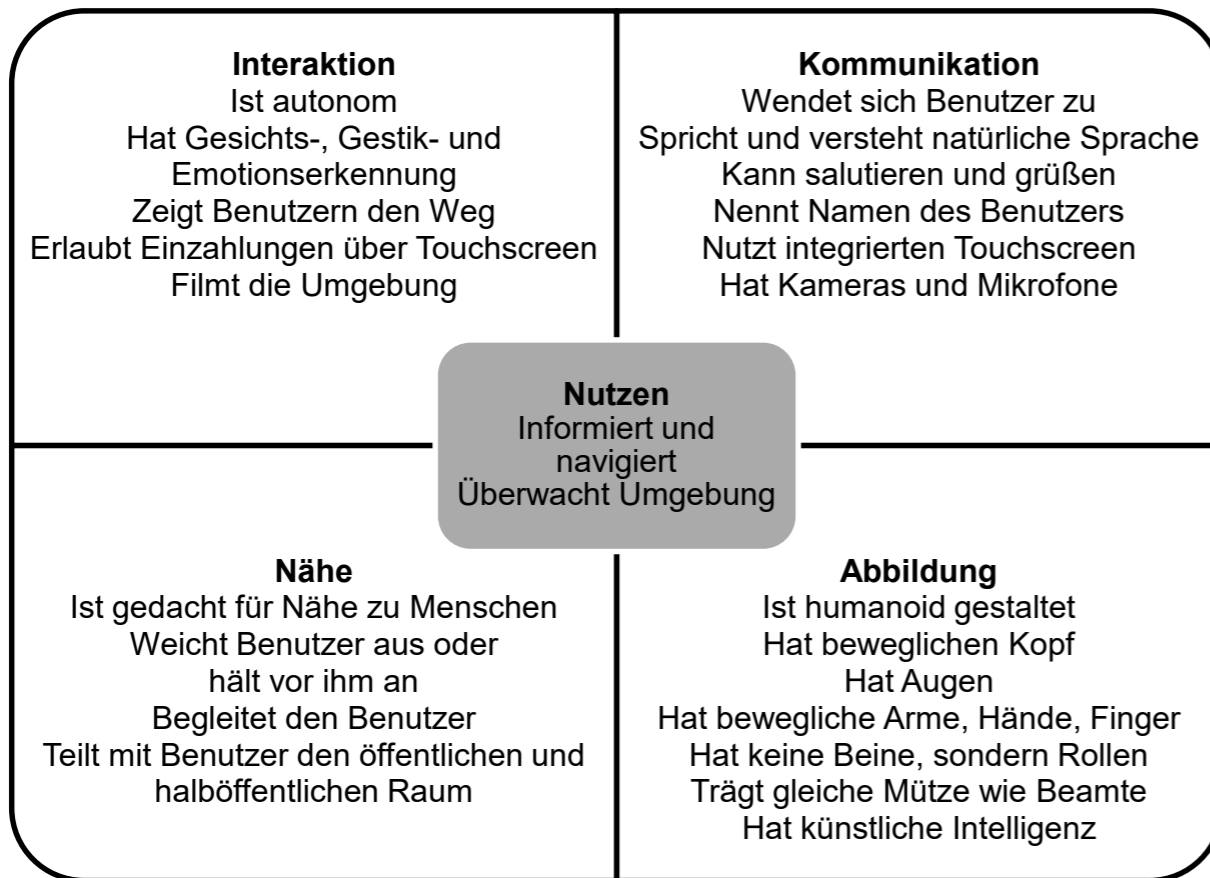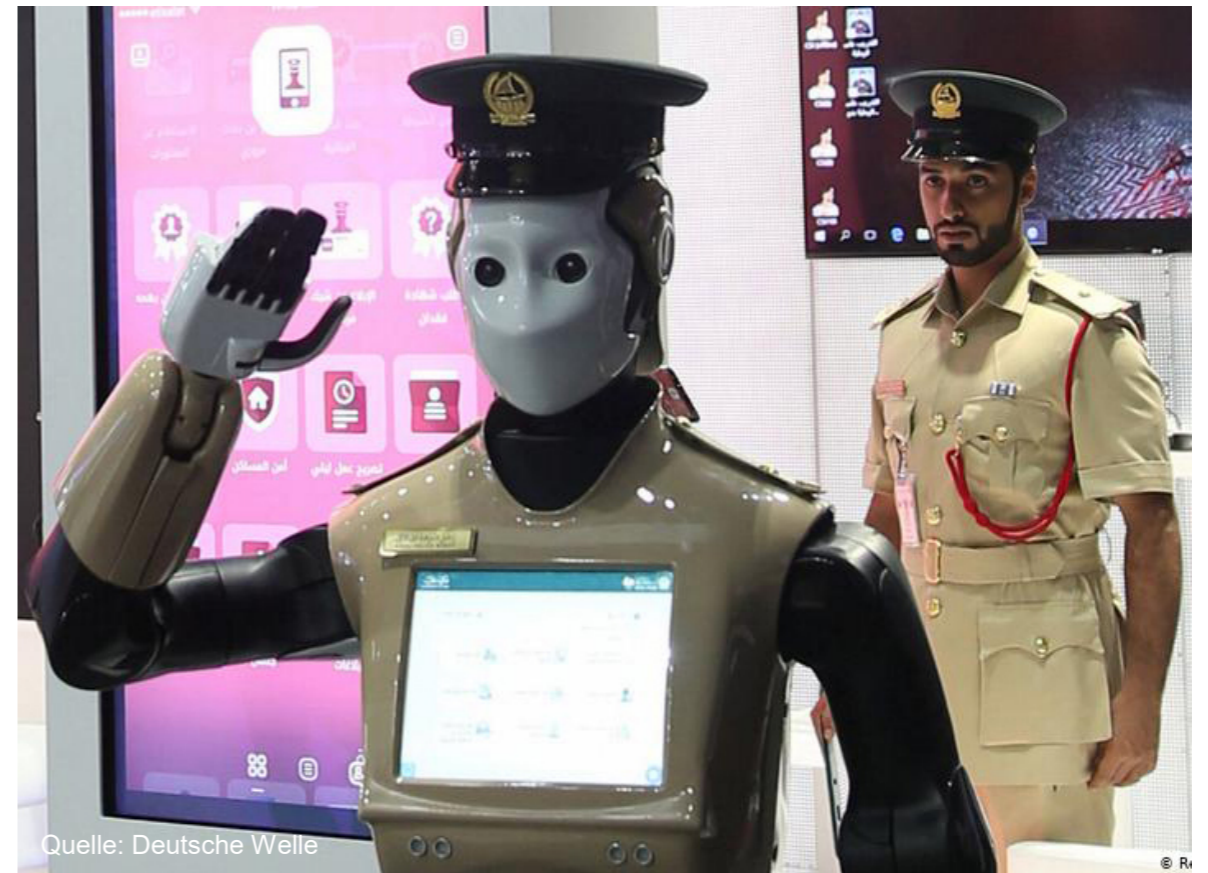

## Haushalts- und Gartenroboter: Happy Hedgehog der HSW-FHNW

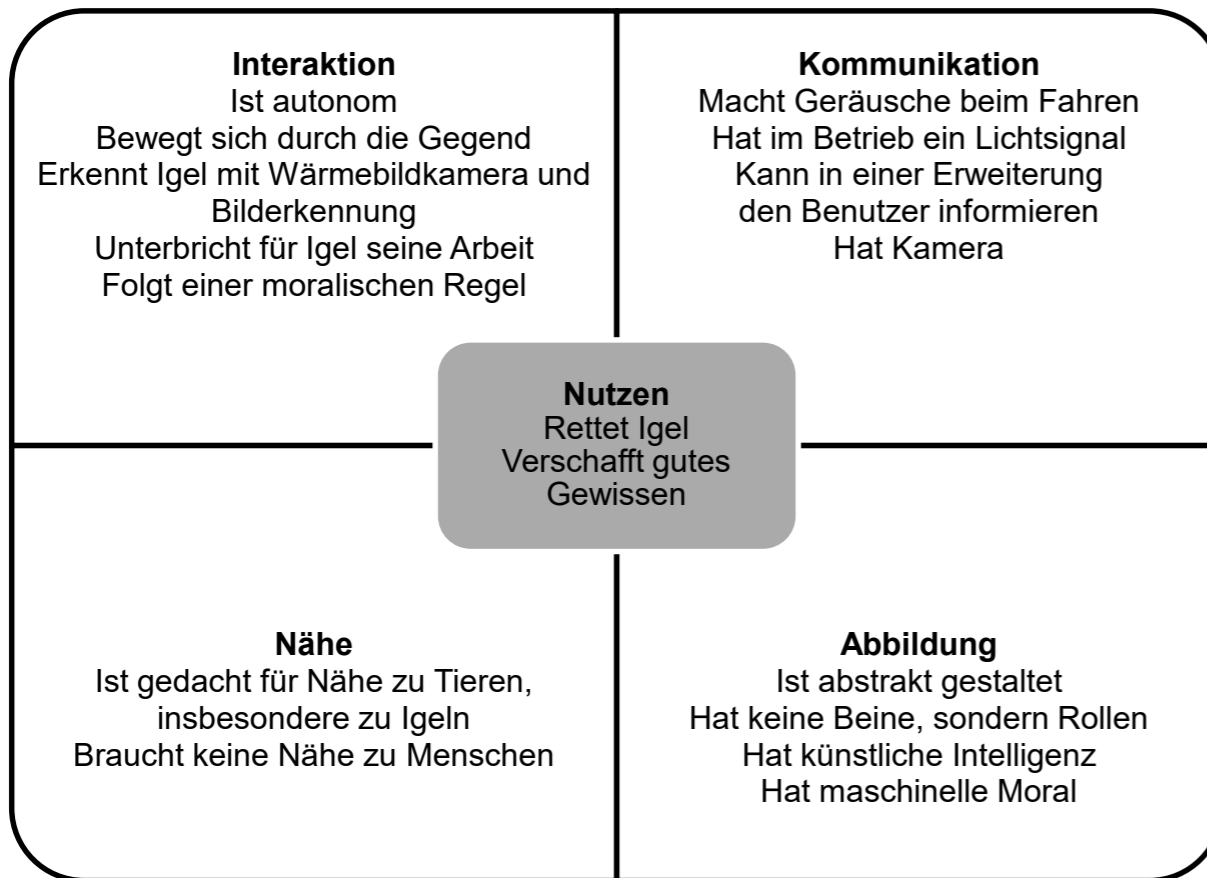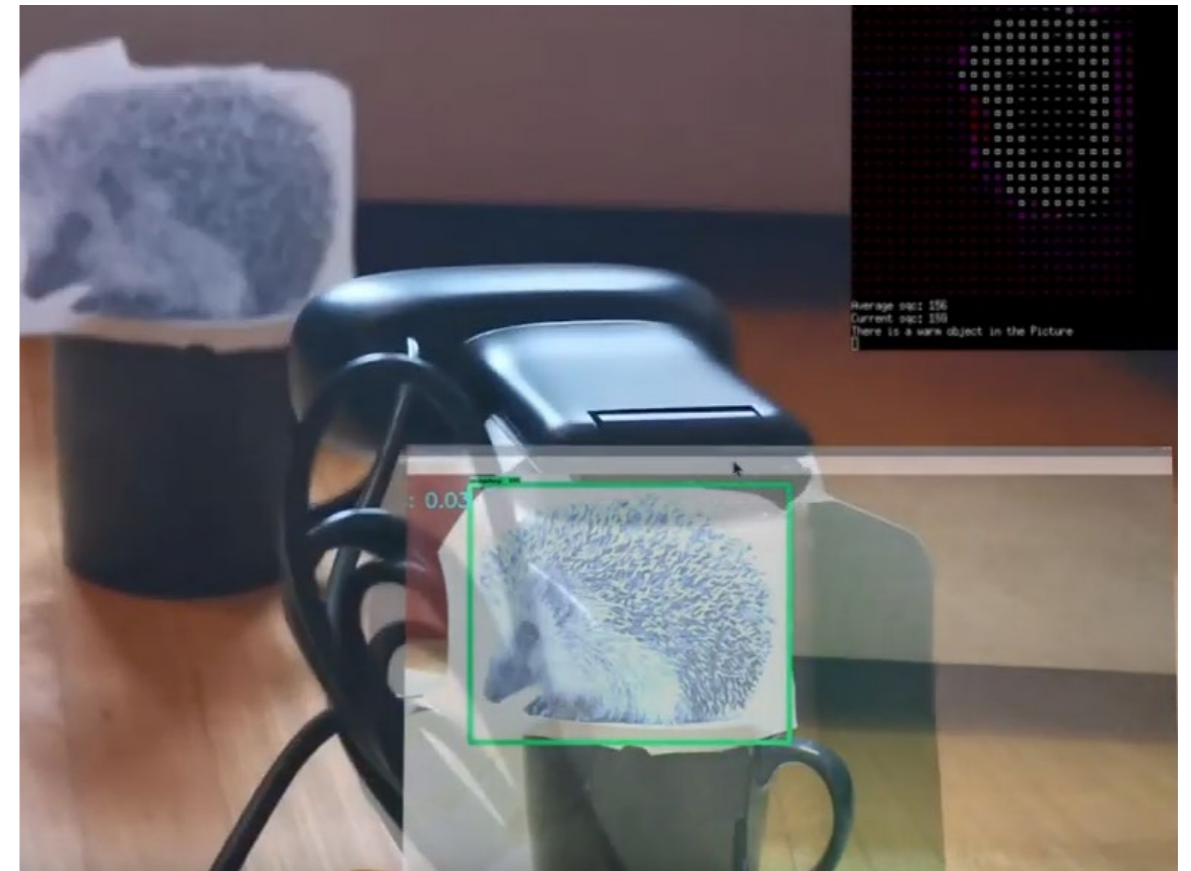

## Zusammenfassung

Soziale Roboter gibt es in allen möglichen Anwendungsbereichen und mit unterschiedlichen Aufgaben.

Sie können soziale Funktionen mit Blick auf Menschen, aber auch mit Blick auf Tiere aufweisen.

Sie haben unterschiedliche Möglichkeiten und Ausprägungen in Bezug auf Interaktion, Kommunikation, Nähe und Abbildung.

## Zusammenfassung

Ein paar Roboter können unsere Partner werden, wobei die Beziehungen einseitig bleiben.

Manche soziale Roboter zeigen Emotionen (die sie nicht haben), und wecken sie, was aus Sicht der Ethik problematisch sein kann.

Problematisch sind in moralischer Hinsicht auch die Möglichkeiten von Sprach- und Gesichtserkennung (Privat- und Intimsphäre).

## Kontakt

Prof. Dr. Oliver Bendel  
Hochschule für Wirtschaft FHNW  
Institut für Wirtschaftsinformatik  
Bahnhofstrasse 6  
CH-5210 Windisch

[oliver.bendel@fhnw.ch](mailto:oliver.bendel@fhnw.ch)

[oliverbendel.net](http://oliverbendel.net) [informationsethik.net](http://informationsethik.net)

[maschinenethik.net](http://maschinenethik.net) [robophilosophy.com](http://robophilosophy.com)

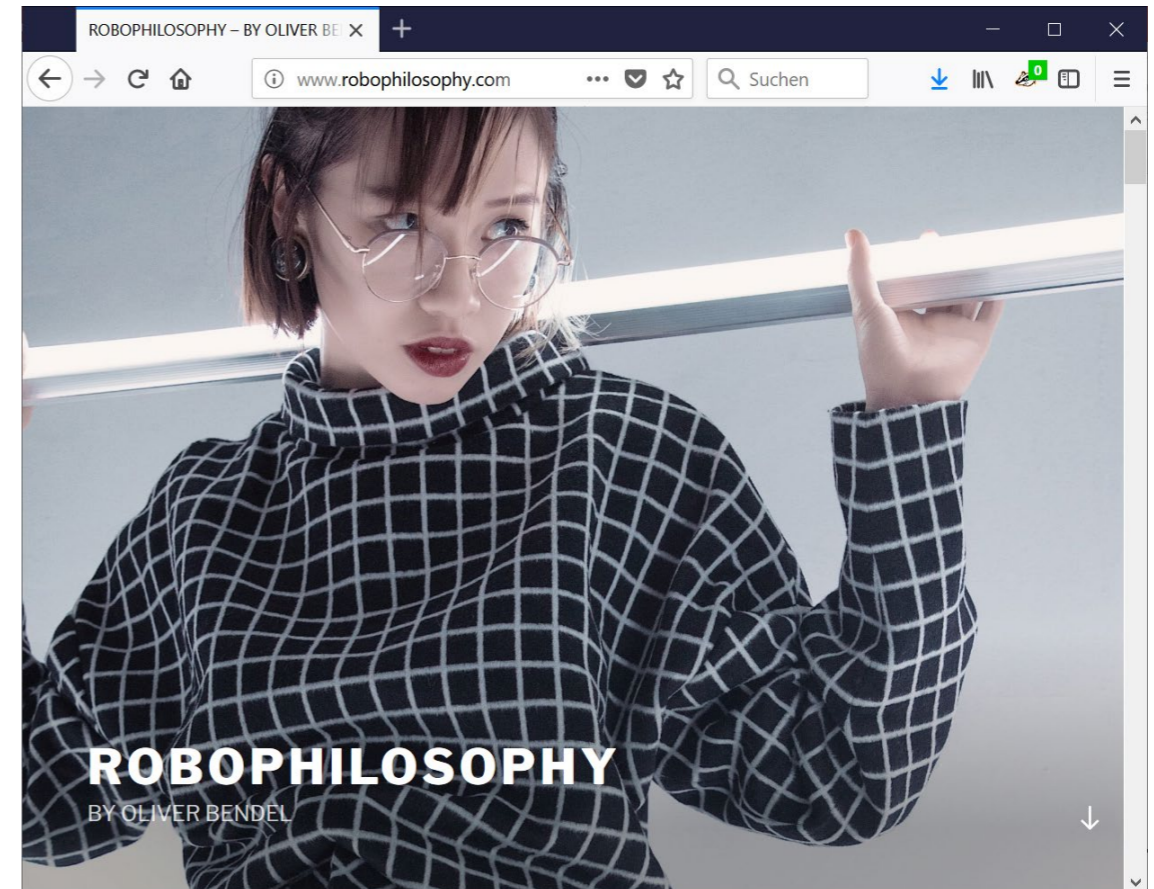

Supplement: jmir_v23i11e20046_app2.pdf [file jmir_v23i11e20046_app2.pdf]
